# Supplementary material
Source: publisher figshare collection journal article supplement (https://frontiersin.figshare.com/ndownloader/files/26612126)
Supplement: Supplementary file 1 [file 26612126]

## Sheet: note
Sessions	Samples	Analyses
20160409p1	IT-BOR1, IT-MU2, IT-PUB, IT-KKB1, MSZ-1	U-Pb age, chemistry
20160409p2	MSZ-1, NEMTI, TAR-3, TAR-Gh-1, SZIV	U-Pb age, chemistry
20191204	SZVG	U-Pb age, chemistry

## Sheet: data
Identifier	Comments2	Comments1	Integration length (seconds)	Pb206_CPS	Pb207_CPS	U238_CPS	Approx_U_PPM	FInal_U_Th_Ratio	FInal_U_Th_Ratio_Int2SE	Final207_235	Final207_235_Prop2SE	Final206_238	Final206_238_Prop2SE	ErrorCorrelation_6_38vs7_35	Final207_206	Final207_206_Prop2SE	Final208_232	Final208_232_Prop2SE	FinalAge207_235	FinalAge207_235_Int2SE	FinalAge207_235_Prop2SE	FinalAge206_238	FinalAge206_238_Int2SE	FinalAge206_238_Prop2SE	FinalAge208_232	FinalAge208_232_Int2SE	FinalAge208_232_Prop2SE	FinalAge207_206	FinalAge207_206_Int2SE	FinalAge207_206_Prop2SE	Dose	Dose_Int2SE	Identifier	Final206_238	FinalAge206_238	FinalAge206_238_Prop2SE	Dose Corrected_Age	Dose CorrectedAge_2SE	Th_Dose corrected_Age	Th_Dose corrected_Age_2SE
20160409p1
GJ-1 - 1			25.333	207800	12370	2360000	352	29.91	0.41	0.818	0.013	0.09801	0.00095	0.31231	0.06047	0.00082	0.0321	0.0033	606.8	7	7.5	602.7	5.6	6.6	638	64	96	618	30	30	742000000000000	36000000000000	GJ-1 - 1	0.09801	602.7	6.6	601.508	6.63832	601.665	6.63832
GJ-1 - 2			33.174	193400	11630	2150000	321	29.36	0.41	0.8188	0.0097	0.09861	0.00056	0.37976	0.05996	0.00063	0.0294	0.002	607.2	5.4	6	606.3	3.3	4.8	591	41	79	607	24	25	682000000000000	38000000000000	GJ-1 - 2	0.09861	606.3	4.8	605.585	4.86106	605.642	4.86106
GJ-1 - 3			34.983	179000	10730	2000000	299	29.74	0.53	0.8161	0.0093	0.09795	0.00051	0.40399	0.06044	0.0007	0.0331	0.0027	605.7	5.2	5.8	602.3	3	4.6	657	52	90	617	25	26	628000000000000	35000000000000	GJ-1 - 3	0.09795	602.3	4.6	602.062	4.66355	602.223	4.66355
GJ-1 - 4			33.482	187900	11390	2110000	323	29.45	0.44	0.8186	0.009	0.09815	0.00061	0.43268	0.06065	0.00056	0.0313	0.0027	607.1	5	5.6	603.6	3.6	5	623	53	87	625	20	21	680000000000000	37000000000000	GJ-1 - 4	0.09815	603.6	5	602.905	5.05764	602.962	5.05764
GJ-1 - 5			35.052	182400	10880	2040000	312	29.83	0.37	0.8144	0.0092	0.09839	0.00066	0.39087	0.05995	0.00065	0.0302	0.0025	604.8	5.2	5.8	604.9	3.8	5.2	601	49	83	604	23	24	658000000000000	37000000000000	GJ-1 - 5	0.09839	604.9	5.2	604.393	5.25558	604.549	5.25558
GJ-1 - 6			35.452	182200	10920	2020000	309	29.85	0.36	0.8078	0.0094	0.09783	0.00069	0.566	0.06032	0.00066	0.0286	0.0027	601	5.3	5.8	601.7	4.1	5.3	569	53	82	613	23	24	649000000000000	36000000000000	GJ-1 - 6	0.09783	601.7	5.3	601.274	5.35399	601.339	5.35399
GJ-1 - 7			35.223	176800	10440	2000000	315	29.81	0.5	0.8018	0.0096	0.09725	0.00056	0.084669	0.05976	0.00078	0.0289	0.0024	597.7	5.4	5.9	598.3	3.3	4.7	575	47	80	592	28	29	659000000000000	38000000000000	GJ-1 - 7	0.09725	598.3	4.7	597.79	4.76086	597.852	4.76086
GJ-1 - 8			34.734	173500	10430	1960000	308	29.83	0.5	0.808	0.01	0.09758	0.00056	0.22358	0.06014	0.00076	0.0287	0.0027	601.1	5.6	6.2	600.2	3.3	4.8	570	53	82	606	27	28	645000000000000	37000000000000	GJ-1 - 8	0.09758	600.2	4.8	599.81	4.86002	599.906	4.86002
GJ-1 - 9			29.198	184200	10890	2100000	332	29.47	0.44	0.8032	0.0086	0.09824	0.0006	0.38625	0.05939	0.00057	0.0309	0.0027	598.5	4.8	5.5	604.1	3.5	5	614	53	86	584	20	21	698000000000000	38000000000000	GJ-1 - 9	0.09824	604.1	5	603.255	5.05769	603.347	5.05769
GJ-1 - 10			23.478	181800	10840	2083000	337	29.86	0.41	0.814	0.01	0.09789	0.00079	0.27186	0.05995	0.00089	0.0268	0.0031	604.8	5.7	6.3	602	4.6	5.8	545	58	82	599	32	33	709000000000000	33000000000000	GJ-1 - 10	0.09789	602	5.8	601.069	5.84716	601.209	5.84716
GJ-1 - 11			35.217	168500	10080	1880000	305	29.83	0.45	0.8156	0.0095	0.09809	0.00059	0.33281	0.06008	0.00065	0.0324	0.0025	605.4	5.3	5.9	603.2	3.5	4.9	645	50	87	605	24	24	642000000000000	36000000000000	GJ-1 - 11	0.09809	603.2	4.9	602.835	4.95935	602.924	4.95935
GJ-1 - 12			21.13	184200	11050	2152000	349	29.37	0.6	0.8085	0.0088	0.09773	0.0007	0.14465	0.06026	0.00081	0.0344	0.0031	601.5	4.9	5.6	601.1	4.1	5.4	683	61	97	611	29	30	731000000000000	30000000000000	GJ-1 - 12	0.09773	601.1	5.4	599.996	5.45164	600.105	5.45164
GJ-1 - 13			35.309	163400	9830	1850000	308	29.75	0.52	0.81	0.011	0.09751	0.00063	0.11371	0.06024	0.00088	0.0317	0.0026	602.3	6.4	6.9	599.8	3.7	5	630	50	86	608	31	32	644000000000000	36000000000000	GJ-1 - 13	0.09751	599.8	5	599.42	5.05733	599.503	5.05733
GJ-1 - 14			34.959	165000	9820	1870000	312	29.27	0.49	0.8001	0.0086	0.09695	0.00058	0.16473	0.05994	0.00075	0.0284	0.0022	596.7	4.8	5.4	596.5	3.4	4.8	565	43	76	599	27	28	652000000000000	36000000000000	GJ-1 - 14	0.09695	596.5	4.8	596.052	4.85915	596.148	4.85915
GJ-1 - 15			18.179	180700	10780	2138000	357	29.81	0.49	0.812	0.011	0.09761	0.00069	0.21379	0.06034	0.00086	0.0258	0.0023	603.4	6.4	6.9	600.4	4.1	5.3	515	45	73	614	31	32	749000000000000	33000000000000	GJ-1 - 15	0.09761	600.4	5.3	599.159	5.35291	599.269	5.35291
GJ-1 - 16			35.127	159800	9590	1810000	310	29.77	0.41	0.812	0.012	0.09779	0.00064	0.38212	0.0602	0.00083	0.0313	0.0029	604.4	7.1	7.6	601.4	3.8	5.1	622	57	90	618	28	29	651000000000000	35000000000000	GJ-1 - 16	0.09779	601.4	5.1	600.957	5.15626	601.088	5.15626
GJ-1 - 17			34.737	160600	9640	1820000	312	30.14	0.45	0.811	0.011	0.09779	0.00054	0.34893	0.06034	0.00076	0.0308	0.0022	602.7	6.4	6.9	601.5	3.1	4.7	613	43	80	618	28	29	655000000000000	37000000000000	GJ-1 - 17	0.09779	601.5	4.7	601.022	4.76158	601.054	4.76158
GJ-1 - 18			26.931	154400	9230	1710000	294	29.95	0.59	0.812	0.01	0.09705	0.00065	0.38108	0.06058	0.00074	0.0284	0.0026	604.3	6	6.6	597.1	3.8	5.1	566	51	81	622	26	27	612000000000000	30000000000000	GJ-1 - 18	0.09705	597.1	5.1	597.01	5.15658	597.079	5.15658
GJ-1 - 19			35.023	156700	9390	1770000	314	29.74	0.45	0.814	0.0098	0.0973	0.00072	0.32807	0.06057	0.00073	0.0289	0.0024	604.5	5.5	6.1	598.5	4.3	5.5	576	48	80	622	26	27	656000000000000	39000000000000	GJ-1 - 19	0.0973	598.5	5.5	598.015	5.55096	598.17	5.55096
GJ-1 - 20			35.023	157100	9390	1770000	313	29.35	0.4	0.8168	0.0094	0.09823	0.00044	0.1027	0.06011	0.00068	0.0315	0.0029	606.9	5	5.6	604	2.6	4.3	626	57	90	605	25	26	662000000000000	38000000000000	GJ-1 - 20	0.09823	604	4.3	603.459	4.36851	603.578	4.36851
GJ-1 - 21			35.023	157500	9460	1790000	316	30.17	0.4	0.8106	0.0092	0.09732	0.0006	0.41105	0.06058	0.00064	0.0313	0.0028	602.7	5.2	5.7	598.7	3.5	4.9	623	55	88	622	23	24	660000000000000	39000000000000	GJ-1 - 21	0.09732	598.7	4.9	598.181	4.95815	598.255	4.95815
GJ-1 - 22			35.292	154700	9210	1740000	318	29.97	0.48	0.8181	0.0095	0.09851	0.00059	0.42329	0.06045	0.00072	0.0313	0.0029	606.8	5.3	5.9	605.6	3.5	4.9	621	58	90	621	25	26	672000000000000	40000000000000	GJ-1 - 22	0.09851	605.6	4.9	604.971	4.95948	605.137	4.95948
GJ-1 - 23			34.946	156400	9340	1760000	321	30.33	0.48	0.8115	0.0091	0.09807	0.00055	0.028191	0.06004	0.00066	0.0302	0.0028	603.2	5.1	5.7	603.1	3.2	4.7	600	55	86	603	24	25	677000000000000	39000000000000	GJ-1 - 23	0.09807	603.1	4.7	602.431	4.76185	602.517	4.76185
GJ-1 - 24			35.292	154800	9280	1740000	318	29.17	0.44	0.8151	0.0087	0.09799	0.00053	0.061113	0.06023	0.00071	0.028	0.0025	605.2	4.8	5.5	602.6	3.1	4.6	557	50	80	610	25	26	670000000000000	40000000000000	GJ-1 - 24	0.09799	602.6	4.6	601.991	4.66327	602.104	4.66327
GJ-1 - 25			34.775	153000	9050	1730000	325	29.97	0.47	0.809	0.011	0.09819	0.0006	0.47267	0.05952	0.00079	0.0323	0.0032	601.9	6.2	6.7	603.8	3.5	4.9	641	62	94	583	29	30	683000000000000	38000000000000	GJ-1 - 25	0.09819	603.8	4.9	603.08	4.95906	603.172	4.95906
GJ-1 - 26			35.233	150600	8960	1700000	321	29.61	0.4	0.8105	0.0097	0.0979	0.00066	0.43517	0.06018	0.00064	0.0281	0.0025	602.6	5.4	6	602.1	3.9	5.2	559	50	79	608	23	24	673000000000000	39000000000000	GJ-1 - 26	0.0979	602.1	5.2	601.466	5.25478	601.552	5.25478
GJ-1 - 27			35.233	153500	9210	1740000	328	29.45	0.52	0.813	0.011	0.0976	0.00062	0.34823	0.06047	0.00077	0.0322	0.0022	603.8	6.4	6.9	600.3	3.6	5	641	43	83	617	28	28	689000000000000	40000000000000	GJ-1 - 27	0.0976	600.3	5	599.534	5.0569	599.664	5.0569
GJ-1 - 28			35.207	147800	8850	1672000	325	29.82	0.35	0.815	0.011	0.09761	0.00058	0.46158	0.06039	0.00068	0.0317	0.0027	606.1	5.8	6.3	600.4	3.4	4.8	630	54	88	615	25	25	681000000000000	39000000000000	GJ-1 - 28	0.09761	600.4	4.8	599.701	4.85978	599.786	4.85978
GJ-1 - 29			35.207	150000	8840	1688000	328	29.5	0.5	0.805	0.011	0.09823	0.00059	0.34705	0.05965	0.00081	0.0309	0.0025	599.3	6.5	6.9	604	3.5	4.9	615	49	84	596	28	29	691000000000000	40000000000000	GJ-1 - 29	0.09823	604	4.9	603.213	4.9591	603.343	4.9591
GJ-1 - 30			35.207	148300	8790	1676000	326	29.3	0.54	0.814	0.011	0.0983	0.00057	0.37577	0.05995	0.00067	0.0285	0.0025	604.6	5.9	6.5	604.4	3.3	4.8	568	49	80	608	24	25	687000000000000	39000000000000	GJ-1 - 30	0.0983	604.4	4.8	603.646	4.86064	603.785	4.86064
NIST 610 - 1			35.061	468000	428000	2260000	337	0.9177	0.0069	28.18	0.47	0.2242	0.0038	0.89379	0.9094	0.0051	0.5232	0.0045	3424	16	17	1304	20	21	8504	59	780	5210	11	13	2030000000000000	170000000000000	NIST 610 - 1	0.2242	1304	21	1289.11	20.9935	1290.59	20.9935
NIST 610 - 2			35.043	477000	427000	2290000	342	0.9235	0.007	28.16	0.48	0.2253	0.0041	0.93018	0.9082	0.0051	0.5256	0.0044	3423	16	17	1310	22	23	8536	59	780	5207	12	13	2100000000000000	180000000000000	NIST 610 - 2	0.2253	1310	23	1294.63	22.953	1295.95	22.953
NIST 610 - 3			35.071	457000	413000	2230000	336	0.9239	0.0064	27.76	0.47	0.2221	0.004	0.93717	0.9084	0.0057	0.5229	0.0044	3409	17	17	1293	21	22	8501	59	780	5208	13	14	2000000000000000	170000000000000	NIST 610 - 3	0.2221	1293	22	1278.41	21.9675	1279.79	21.9675
NIST 610 - 4			35.043	451000	408000	2220000	341	0.9276	0.0067	27.75	0.47	0.2218	0.0041	0.92773	0.9096	0.0051	0.5166	0.0047	3409	17	17	1291	22	23	8416	63	780	5210	11	13	2030000000000000	170000000000000	NIST 610 - 4	0.2218	1291	23	1276.26	22.9463	1278.06	22.9463
NIST 610 - 5			35.034	423000	381000	2080000	328	0.9301	0.0053	27.77	0.48	0.2226	0.0042	0.95726	0.9071	0.0042	0.5209	0.0053	3409	17	18	1295	22	23	8473	70	780	5204.7	9.4	11	1980000000000000	170000000000000	NIST 610 - 5	0.2226	1295	23	1280.51	22.9475	1282.51	22.9475
NIST 610 - 6			35.054	411000	370000	1990000	323	0.92	0.0069	27.82	0.44	0.2227	0.0038	0.95277	0.9049	0.0045	0.5215	0.0048	3411	15	16	1296	20	21	8482	64	780	5200	10	12	1950000000000000	170000000000000	NIST 610 - 6	0.2227	1296	21	1281.68	20.9889	1283.2	20.9889
NIST 610 - 7			35.051	392000	353000	1920000	320	0.9305	0.0071	27.76	0.44	0.2214	0.0035	0.93112	0.9093	0.0052	0.5213	0.0048	3409	15	16	1289	19	20	8479	64	780	5210	12	13	1870000000000000	150000000000000	NIST 610 - 7	0.2214	1289	20	1275.26	20.0061	1276.86	20.0061
NIST 610 - 8			35.094	382000	341000	1890000	326	0.932	0.007	27.4	0.46	0.2181	0.0036	0.95671	0.9087	0.0047	0.5152	0.004	3396	16	17	1271	19	20	8398	53	780	5208	11	12	1910000000000000	150000000000000	NIST 610 - 8	0.2181	1271	20	1257.21	20.001	1259.35	20.001
NIST 610 - 9			35.034	379000	338000	1890000	336	0.9354	0.0054	27.54	0.49	0.2189	0.0037	0.95818	0.91	0.0043	0.5189	0.0049	3401	17	18	1276	20	21	8447	65	780	5211.2	9.7	11	1960000000000000	160000000000000	NIST 610 - 9	0.2189	1276	21	1261.84	20.9823	1263.26	20.9823
NIST 610 - 10			35.044	376000	338000	1850000	340	0.9408	0.0072	27.54	0.45	0.2198	0.0038	0.9532	0.9078	0.0043	0.5264	0.0051	3404	17	17	1280	20	21	8546	67	790	5206.2	9.7	12	2010000000000000	170000000000000	NIST 610 - 10	0.2198	1280	21	1265.5	20.9846	1267.71	20.9846
NIST 610 - 11			35.033	363000	327000	1780000	338	0.9342	0.0061	27.71	0.44	0.2193	0.0034	0.94527	0.9115	0.0047	0.5236	0.0048	3408	15	16	1278	18	19	8509	64	780	5215	11	12	1990000000000000	160000000000000	NIST 610 - 11	0.2193	1278	19	1263.64	19.0288	1265.2	19.0288
Plesovice - 2			35.097	172200	9090	3550000	558	10.146	0.095	0.3918	0.0053	0.05346	0.00034	0.3521	0.0532	0.00071	0.01777	0.00094	335.6	3.8	4.2	335.7	2.1	2.9	356	19	44	334	30	31	646000000000000	40000000000000	Plesovice - 2	0.05346	335.7	2.9	335.477	2.93082	335.581	2.93082
Plesovice - 3			34.948	119600	6300	2430000	392	10.58	0.11	0.3956	0.0063	0.05383	0.00032	0.24619	0.05285	0.00079	0.0178	0.0011	338.3	4.6	4.8	338	1.9	2.8	357	21	45	323	35	36	458000000000000	21000000000000	Plesovice - 3	0.05383	338	2.8	338.883	2.84066	338.923	2.84066
Plesovice - 6			28.61	171600	9110	3550000	627	9.82	0.12	0.3967	0.0057	0.05398	0.00036	0.42974	0.05356	0.00067	0.01675	0.00078	339.1	4.1	4.4	338.9	2.2	3	336	16	41	350	28	29	734000000000000	37000000000000	Plesovice - 6	0.05398	338.9	3	338.265	3.02971	338.361	3.02971
Plesovice - 7			35.452	262000	13920	5280000	961	6.379	0.051	0.4124	0.0045	0.05562	0.00036	0.35118	0.05362	0.00054	0.01839	0.0006	350.5	3.2	3.6	348.9	2.2	3	368	12	43	357	23	24	1173000000000000	78000000000000	Plesovice - 7	0.05562	348.9	3	346.703	3.04329	346.864	3.04329
Plesovice - 8			28.543	183400	9720	3750000	704	9.533	0.069	0.4035	0.0043	0.05485	0.00033	0.14505	0.05326	0.00061	0.01741	0.00078	344.8	2.9	3.3	344.2	2	2.9	349	15	42	338	26	27	837000000000000	43000000000000	Plesovice - 8	0.05485	344.2	2.9	343.127	2.93359	343.254	2.93359
Plesovice - 9			17.674	274000	14450	5990000	1161	7.08	0.094	0.3972	0.0064	0.05442	0.00072	0.58392	0.05402	0.00087	0.0181	0.0012	339.6	4.7	4.9	341.6	4.4	4.8	363	25	47	369	36	36	1381000000000000	49000000000000	Plesovice - 9	0.05442	341.6	4.8	338.926	4.80794	339.066	4.80794
91500 - 1			36.346	80300	5970	495000	75.6	2.466	0.031	1.827	0.02	0.1778	0.0011	0.28169	0.07447	0.00087	0.0563	0.0026	1057.2	7.3	8.1	1054.7	6.1	8.5	1107	49	130	1060	25	26	315000000000000	17000000000000	91500 - 1	0.1778	1054.7	8.5	1061.24	8.69823	1061.04	8.69823
91500 - 2			24.671	80400	5940	506000	79.5	2.523	0.033	1.814	0.026	0.1771	0.0018	0.35566	0.0747	0.001	0.0557	0.0025	1050.1	9.4	10	1051.1	9.9	11	1094	48	130	1058	28	29	330000000000000	15000000000000	91500 - 2	0.1771	1051.1	11	1057.15	11.1698	1056.75	11.1698
91500 - 3			15.773	88800	6580	585000	94.5	2.462	0.037	1.851	0.049	0.1778	0.0023	0.45427	0.0752	0.0015	0.0505	0.0027	1063	17	18	1055	13	14	995	52	120	1072	40	40	394000000000000	14000000000000	91500 - 3	0.1778	1055	14	1059.28	14.1282	1058.95	14.1282
91500 - 4			23.004	85800	6250	556000	92.5	2.475	0.031	1.791	0.043	0.175	0.0016	0.24538	0.0745	0.0016	0.0542	0.0026	1044	15	15	1039.6	8.8	11	1077	46	120	1058	47	47	381000000000000	17000000000000	91500 - 4	0.175	1039.6	11	1044.15	11.1387	1043.86	11.1387
91500 - 5			11.586	67100	5020	399000	68.5	2.423	0.047	1.827	0.059	0.1758	0.0019	0.60887	0.0759	0.0018	0.0577	0.0036	1060	19	19	1044	11	12	1133	68	140	1090	47	48	282000000000000	10000000000000	91500 - 5	0.1758	1044	12	1051.59	12.2026	1051.05	12.2026
91500 - 6			36.126	59700	4460	377000	66.6	2.498	0.033	1.822	0.026	0.1761	0.0012	0.046528	0.075	0.0012	0.055	0.0023	1052.9	9.3	9.9	1045.6	6.8	9	1081	44	130	1063	32	33	275000000000000	15000000000000	91500 - 6	0.1761	1045.6	9	1053.45	9.22609	1052.94	9.22609
91500 - 7			35.245	57200	4190	349000	63.6	2.526	0.032	1.838	0.037	0.1795	0.0016	0.45893	0.0741	0.0013	0.0563	0.0021	1058	13	14	1063.9	8.5	10	1107	40	130	1039	34	34	267000000000000	15000000000000	91500 - 7	0.1795	1063.9	10	1072.2	10.2313	1071.95	10.2313
91500 - 8			25.473	50700	3770	323000	60.6	2.852	0.044	1.846	0.038	0.1786	0.0014	0.221	0.0748	0.0015	0.0549	0.0034	1061	14	14	1059.5	7.6	9.6	1080	65	130	1058	41	42	251000000000000	12000000000000	91500 - 8	0.1786	1059.5	9.6	1068.39	9.85136	1067.58	9.85136
91500 - 9			29.911	53100	4010	328000	63.5	2.641	0.03	1.842	0.034	0.1775	0.0014	0.42875	0.0754	0.0013	0.0566	0.0025	1060	12	13	1053.3	7.9	9.8	1113	48	130	1076	35	35	262000000000000	15000000000000	91500 - 9	0.1775	1053.3	9.8	1061.71	10.0351	1061.11	10.0351
AUSZ7-1 - 1			30.984	3370	163	619000	94.7	2.905	0.034	0.0398	0.0035	0.00584	0.00011	-0.13667	0.0494	0.0045	0.00203	0.00036	39.5	3.4	3.4	37.52	0.69	0.73	41	7.3	8.7	140	170	170	12510000000000	690000000000	AUSZ7-1 - 1	0.00584	37.52	0.73	38.9551	0.794676	39.0417	0.794695
AUSZ7-1 - 2			28.808	3210	139	575000	90.4	2.879	0.039	0.0361	0.0027	0.00594	0.00014	0.037742	0.045	0.004	0.00197	0.00039	35.9	2.7	2.7	38.18	0.91	0.94	39.8	7.9	9.1	-20	160	160	12240000000000	630000000000	AUSZ7-1 - 2	0.00594	38.18	0.94	39.6489	1.00633	39.7155	1.00634
AUSZ7-1 - 3			35.042	2950	134	562000	90.8	3.012	0.028	0.0354	0.0032	0.00577	0.00012	-0.26052	0.0438	0.0044	0.00206	0.00035	35.8	3.1	3.1	37.1	0.74	0.77	41.6	7.1	8.5	-40	170	170	11920000000000	670000000000	AUSZ7-1 - 3	0.00577	37.1	0.77	38.5374	0.83488	38.5943	0.834898
AUSZ7-1 - 4			36.385	2650	122	511000	85.1	3.149	0.036	0.036	0.003	0.00567	0.00012	-0.05951	0.0455	0.0042	0.00204	0.00042	35.9	3	3	36.44	0.78	0.81	41.2	8.5	9.7	30	170	170	10960000000000	650000000000	AUSZ7-1 - 4	0.00567	36.44	0.81	37.8833	0.875749	37.96	0.875767
AUSZ7-1 - 5			35.763	2742	128	513000	87.9	3.059	0.03	0.0382	0.0041	0.00587	0.0001	0.18611	0.048	0.005	0.002	0.00041	38	4	4	37.73	0.65	0.69	40.4	8.2	9.4	80	190	190	11600000000000	610000000000	AUSZ7-1 - 5	0.00587	37.73	0.69	39.2024	0.757707	39.2704	0.757726
AUSZ7-1 - 6			35.015	2760	130	522000	92.3	3.022	0.03	0.038	0.0031	0.00585	0.00014	-0.0047984	0.048	0.0041	0.00199	0.00036	37.8	3	3	37.61	0.87	0.9	40.1	7.3	8.6	100	160	160	12270000000000	680000000000	AUSZ7-1 - 6	0.00585	37.61	0.9	39.056	0.965109	39.1157	0.965124
AUSZ7-1 - 7			25.631	2570	128	462000	84.1	3.02	0.044	0.0399	0.0032	0.00591	0.00014	-0.096129	0.0493	0.0042	0.00201	0.00056	39.7	3.2	3.2	37.98	0.88	0.91	41	11	12	150	160	160	11150000000000	640000000000	AUSZ7-1 - 7	0.00591	37.98	0.91	39.4776	0.978234	39.5521	0.978249
AUSZ7-1 - 8			34.83	2730	128	511000	96.1	2.998	0.035	0.0387	0.0039	0.00592	0.00012	0.014541	0.0482	0.0051	0.00169	0.0004	38.5	3.8	3.8	38.06	0.76	0.79	34	8.1	9	100	200	200	12950000000000	810000000000	AUSZ7-1 - 8	0.00592	38.06	0.79	39.5023	0.854344	39.5605	0.854361
AUSZ7-1 - 9			34.519	2460	115	462000	89.5	3.119	0.042	0.0395	0.004	0.00584	0.00012	0.091933	0.0485	0.0047	0.00172	0.00033	39.2	3.9	3.9	37.51	0.74	0.78	34.8	6.6	7.6	140	190	190	11950000000000	720000000000	AUSZ7-1 - 9	0.00584	37.51	0.78	38.9623	0.845523	39.0593	0.845541
AUSZ7-5 - 1			22.392	185	11.8	596000	91.1	1.596	0.022	0.0032	0.0015	0.000354	3.6e-05	0.20639	0.076	0.033	0.000144	8.7e-05	3.2	1.5	1.5	2.28	0.23	0.23	2.9	1.8	1.8	280	800	800	789000000000	84000000000	AUSZ7-5 - 1	0.000354	2.28	0.23	2.4336	0.246899	2.50844	0.262678
AUSZ7-5 - 2			35.452	167	9.2	517000	81.2	1.56	0.015	0.0027	0.0011	0.000346	3e-05	0.10154	0.057	0.027	0.000211	9.5e-05	2.7	1.2	1.2	2.23	0.2	0.2	4.3	1.9	2	-170	700	700	685000000000	68000000000	AUSZ7-5 - 2	0.000346	2.23	0.2	2.38365	0.215397	2.45684	0.234122
AUSZ7-5 - 3			35.979	151	7.9	500000	80.9	1.564	0.018	0.0026	0.0011	0.000332	3e-05	-0.11092	0.062	0.028	0.000155	6.6e-05	2.6	1.1	1.1	2.14	0.19	0.19	3.1	1.3	1.4	10	690	690	645000000000	60000000000	AUSZ7-5 - 3	0.000332	2.14	0.19	2.28885	0.204814	2.3618	0.226032
AUSZ7-5 - 4			36.385	164	10.1	491000	81.8	1.565	0.017	0.003	0.0015	0.000371	3.1e-05	-0.030923	0.067	0.037	0.000204	8.4e-05	3	1.6	1.6	2.39	0.2	0.2	4.1	1.7	1.8	-390	700	700	717000000000	76000000000	AUSZ7-5 - 4	0.000371	2.39	0.2	2.55349	0.21551	2.62785	0.231874
AUSZ7-5 - 5			36.281	148	7.3	485000	83.2	1.567	0.015	0.00228	0.00096	0.00034	2.5e-05	0.20708	0.051	0.022	0.000123	9.7e-05	2.31	0.98	0.98	2.19	0.16	0.16	2.5	2	2	-130	650	650	667000000000	56000000000	AUSZ7-5 - 5	0.00034	2.19	0.16	2.34153	0.173033	2.41614	0.196614
AUSZ7-5 - 6			36.126	163	8	478000	84.6	1.539	0.017	0.0025	0.0011	0.000375	2.9e-05	-0.14101	0.05	0.023	0.000113	6.9e-05	2.6	1.1	1.1	2.42	0.19	0.19	2.3	1.4	1.4	-250	590	590	776000000000	68000000000	AUSZ7-5 - 6	0.000375	2.42	0.19	2.58347	0.204756	2.65331	0.221564
AUSZ7-5 - 7			35.245	156	7.9	478000	87.2	1.558	0.018	0.0024	0.001	0.000367	3.3e-05	-0.1851	0.051	0.022	6.8e-05	5.9e-05	2.4	1	1	2.37	0.21	0.21	1.4	1.2	1.2	-40	630	630	759000000000	65000000000	AUSZ7-5 - 7	0.000367	2.37	0.21	2.53066	0.225917	2.59885	0.241909
AUSZ7-5 - 8			36.292	146	11.5	478000	89.9	1.56	0.016	0.0031	0.0015	0.00033	2.5e-05	0.02526	0.083	0.037	9.3e-05	7e-05	3.1	1.5	1.5	2.13	0.16	0.16	1.9	1.4	1.4	90	760	760	741000000000	69000000000	AUSZ7-5 - 8	0.00033	2.13	0.16	2.27495	0.172682	2.34481	0.197666
AUSZ7-5 - 9			35.1	147	7.4	443000	85.9	1.608	0.016	0.0023	0.0012	0.000365	2.9e-05	-0.07405	0.05	0.028	9.3e-05	8.2e-05	2.3	1.2	1.2	2.35	0.19	0.19	1.9	1.7	1.7	-370	740	740	771000000000	81000000000	AUSZ7-5 - 9	0.000365	2.35	0.19	2.50891	0.204664	2.58469	0.222375
synth Zircon blank - 1			35.04	2.5	-1	163	0.025	no value	NAN	no value	NAN	no value	NAN	NaN	no value	NAN	no value	NAN	no value	NAN	NAN	no value	NAN	NAN	no value	NAN	NAN	no value	NAN	NAN	no value	NAN	synth Zircon blank - 1
synth Zircon blank - 2			35.041	-1.2	-0.6	173	0.0272	no value	NAN	no value	NAN	no value	NAN	NaN	no value	NAN	no value	NAN	no value	NAN	NAN	no value	NAN	NAN	no value	NAN	NAN	no value	NAN	NAN	no value	NAN	synth Zircon blank - 2
synth Zircon blank - 3			35.073	-2	1.4	26	0.0042	no value	NAN	no value	NAN	no value	NAN	NaN	no value	NAN	no value	NAN	no value	NAN	NAN	no value	NAN	NAN	no value	NAN	NAN	no value	NAN	NAN	no value	NAN	synth Zircon blank - 3
synth Zircon blank - 4			35.035	-0.3	-2.5	117	0.0196	no value	NAN	no value	NAN	no value	NAN	NaN	no value	NAN	no value	NAN	no value	NAN	NAN	no value	NAN	NAN	no value	NAN	NAN	no value	NAN	NAN	no value	NAN	synth Zircon blank - 4
synth Zircon blank - 5			35.066	-4.6	-2.5	108	0.0185	no value	NAN	no value	NAN	no value	NAN	NaN	no value	NAN	no value	NAN	no value	NAN	NAN	no value	NAN	NAN	no value	NAN	NAN	no value	NAN	NAN	no value	NAN	synth Zircon blank - 5
IT-BOR1 - 1	rim		16.557	4910	232	1880000	312	2.138	0.026	0.0171	0.0015	0.0027	5.9e-05	0.011485	0.0463	0.004	0.0007	0.00012	17.2	1.5	1.5	17.38	0.38	0.39	14.2	2.4	2.9	40	160	160	19500000000000	1200000000000	IT-BOR1 - 1	0.0027	17.38	0.39	17.966	0.41472	18.0401	0.414887
IT-BOR1 - 2	rim		35.156	7310	327	2955000	489.4	1.917	0.014	0.01651	0.0009	0.002671	3.9e-05	0.10452	0.045	0.0026	0.000996	9.2e-05	16.63	0.9	0.91	17.2	0.25	0.27	20.1	1.9	2.9	-20	110	110	30810000000000	390000000000	IT-BOR1 - 2	0.002671	17.2	0.27	17.7004	0.289976	17.7679	0.290219
IT-BOR1 - 3	rim		5.2167	8590	364	3760000	623	2.56	0.12	0.0163	0.0028	0.002785	9.9e-05	0.3082	0.0428	0.0074	0.00108	0.00018	16.4	2.8	2.8	17.93	0.64	0.64	21.8	3.7	4.5	-110	300	300	40100000000000	3200000000000	IT-BOR1 - 3	0.002785	17.93	0.64	18.4042	0.661619	18.4747	0.661717
IT-BOR1 - 4	rim		19.733	13130	598	5030000	835	1.231	0.038	0.01732	0.00085	0.002639	4.9e-05	0.32595	0.0477	0.0023	0.000997	6.4e-05	17.43	0.85	0.85	16.99	0.31	0.33	20.1	1.3	2.6	89	98	98	56500000000000	2300000000000	IT-BOR1 - 4	0.002639	16.99	0.33	17.3811	0.343822	17.4533	0.344032
IT-BOR1 - 5	rim		34.929	13110	610	5480000	909	1.854	0.039	0.01756	0.00072	0.002647	2.7e-05	0.15666	0.0481	0.0019	0.000986	6.8e-05	17.67	0.72	0.73	17.04	0.18	0.2	19.9	1.4	2.6	107	82	83	56100000000000	3900000000000	IT-BOR1 - 5	0.002647	17.04	0.2	17.4335	0.21485	17.5071	0.215185
IT-BOR1 - 6	rim	disc.	35.156	9220	900	3557000	590	2.21	0.13	0.0402	0.0083	0.002847	9.9e-05	0.89806	0.097	0.016	0.00155	0.00028	39.7	7.9	8	18.32	0.63	0.64	31.2	5.7	6.7	1260	310	310	39300000000000	2000000000000	IT-BOR1 - 6	0.002847	18.32	0.64	18.8082	0.662027	18.8875	0.66212
IT-BOR1 - 7	rim	disc.	35.156	26300	1770	10440000	1730	0.761	0.02	0.0248	0.0016	0.002747	3.8e-05	0.47508	0.0659	0.0039	0.001068	5.8e-05	24.8	1.6	1.6	17.68	0.24	0.26	21.6	1.2	2.7	740	120	120	131000000000000	10000000000000	IT-BOR1 - 7	0.002747	17.68	0.26	17.9403	0.26767	18.0169	0.26792
IT-BOR1 - 8	rim		14.289	3647	159	1456000	242	1.834	0.028	0.0159	0.0021	0.002617	5.5e-05	-0.16269	0.0445	0.0061	0.00094	0.0002	16	2.1	2.1	16.85	0.35	0.37	18.9	4.1	4.6	20	260	260	15110000000000	440000000000	IT-BOR1 - 8	0.002617	16.85	0.37	17.4619	0.396702	17.5322	0.396887
IT-BOR1 - 9	rim		20.186	12340	544	5310000	887	2.242	0.051	0.01627	0.00089	0.002646	4.2e-05	-0.22302	0.0443	0.0026	0.00088	0.00012	16.38	0.89	0.89	17.03	0.27	0.29	17.8	2.3	3.1	-50	110	110	52800000000000	3800000000000	IT-BOR1 - 9	0.002646	17.03	0.29	17.4335	0.304366	17.5108	0.304602
IT-BOR1 - 10	rim		29.259	8090	369	3375000	564	1.242	0.058	0.01684	0.00095	0.002616	2.5e-05	0.1345	0.047	0.0025	0.000922	9.2e-05	16.95	0.95	0.95	16.84	0.16	0.19	18.6	1.9	2.8	70	110	110	37560000000000	920000000000	IT-BOR1 - 10	0.002616	16.84	0.19	17.2964	0.209316	17.3706	0.209668
IT-BOR1 - 11	rim	disc.	35.156	5240	300	2070000	347	1.929	0.02	0.022	0.0022	0.002794	3.9e-05	0.3644	0.0572	0.0055	0.00116	0.00014	22.1	2.2	2.2	17.99	0.25	0.27	23.5	2.8	3.8	400	190	190	22900000000000	1300000000000	IT-BOR1 - 11	0.002794	17.99	0.27	18.5673	0.294658	18.6354	0.294877
IT-BOR1 - 12	rim		35.156	16270	734	6690000	1121	1.706	0.079	0.01704	0.00071	0.00267	3.4e-05	0.19462	0.0461	0.0019	0.000929	6e-05	17.15	0.71	0.72	17.19	0.22	0.24	18.8	1.2	2.4	24	79	79	72500000000000	3700000000000	IT-BOR1 - 12	0.00267	17.19	0.24	17.5432	0.25197	17.6146	0.252251
IT-BOR1 - 13	rim		34.929	9660	450	3930000	658	2.461	0.025	0.01733	0.00085	0.002688	4.1e-05	0.086056	0.0467	0.0024	0.00096	0.00011	17.44	0.85	0.85	17.31	0.26	0.28	19.4	2.2	3.1	50	100	100	40800000000000	2100000000000	IT-BOR1 - 13	0.002688	17.31	0.28	17.7648	0.297099	17.8317	0.297333
IT-BOR1 - 14	rim		31.074	17670	815	7120000	1193	1.034	0.015	0.01712	0.00064	0.002648	4.1e-05	0.20026	0.0465	0.0016	0.000916	4.4e-05	17.23	0.64	0.64	17.05	0.26	0.28	18.51	0.9	2.3	40	70	70	81900000000000	2000000000000	IT-BOR1 - 14	0.002648	17.05	0.28	17.3798	0.290752	17.4498	0.290999
IT-BOR1 - 15	rim	disc.	34.929	4260	830	1510000	253	1.479	0.045	0.114	0.033	0.00333	0.00025	0.97335	0.208	0.048	0.0038	0.001	109	30	30	21.4	1.6	1.6	76	20	22	2070	480	480	19300000000000	1000000000000	IT-BOR1 - 15	0.00333	21.4	1.6	22.1238	1.65848	22.2274	1.6585
IT-BOR1 - 16	rim	disc.	35.043	10470	1119	3920000	658	1.532	0.018	0.043	0.0024	0.002849	4.2e-05	0.54561	0.1089	0.0053	0.00169	0.00015	42.7	2.4	2.4	18.34	0.27	0.29	34.1	3.1	4.9	1779	91	91	46900000000000	2900000000000	IT-BOR1 - 16	0.002849	18.34	0.29	18.7963	0.306726	18.8683	0.306928
IT-BOR1 - 17	rim	disc.	35.045	4170	670	1450000	244	1.746	0.041	0.081	0.01	0.003283	9.7e-05	0.76915	0.177	0.02	0.00328	0.00059	78.2	9.6	9.6	21.13	0.62	0.63	66	12	14	2580	190	190	18700000000000	1700000000000	IT-BOR1 - 17	0.003283	21.13	0.63	21.8515	0.662431	21.9221	0.662502
IT-BOR1 - 18	rim	disc.	35.074	8330	516	3470000	583	1.462	0.031	0.0221	0.0019	0.002638	5e-05	0.56045	0.0635	0.0049	0.0011	0.00012	22.1	1.9	1.9	16.98	0.32	0.34	22.2	2.5	3.5	640	160	160	37430000000000	840000000000	IT-BOR1 - 18	0.002638	16.98	0.34	17.4408	0.357491	17.5164	0.357693
IT-BOR1 - 19	rim		29.486	8650	407	3670000	616	2.016	0.032	0.01693	0.00083	0.00259	3.4e-05	-0.27408	0.048	0.0027	0.00099	0.0001	17.22	0.88	0.89	16.67	0.22	0.24	20.1	2.1	3.1	100	110	110	36900000000000	1600000000000	IT-BOR1 - 19	0.00259	16.67	0.24	17.1247	0.257825	17.2019	0.258116
IT-BOR1 - 20	rim		27.671	3190	132	1330000	223	1.736	0.088	0.0158	0.0019	0.002644	6.3e-05	0.060998	0.0434	0.0054	0.00089	0.00013	15.9	1.9	1.9	17.02	0.41	0.42	18	2.7	3.3	-80	210	210	14600000000000	1700000000000	IT-BOR1 - 20	0.002644	17.02	0.42	17.6441	0.447595	17.7181	0.447756
IT-BOR1 - 21	rim		21.094	7950	387	3498000	589	1.556	0.021	0.0176	0.0013	0.002602	4.4e-05	-0.068919	0.0492	0.0038	0.000763	8.2e-05	17.7	1.3	1.3	16.75	0.28	0.3	15.4	1.7	2.4	180	160	160	37320000000000	790000000000	IT-BOR1 - 21	0.002602	16.75	0.3	17.205	0.317257	17.2792	0.317491
IT-BOR1 - 22	rim		26.991	9430	425	4020000	677	1.675	0.033	0.01605	0.00086	0.002626	3.5e-05	-0.21573	0.0444	0.0026	0.000879	9e-05	16.16	0.86	0.87	16.91	0.22	0.24	17.8	1.8	2.7	-40	110	110	42800000000000	2200000000000	IT-BOR1 - 22	0.002626	16.91	0.24	17.3462	0.256614	17.4145	0.256898
IT-BOR1 - 23	rim	disc.	34.929	10900	6800	1250000	211	1.8	0.24	14.1	4.1	0.125	0.036	0.99745	0.552	0.095	0.303	0.08	1840	440	440	720	200	200	4900	1300	1400	3680	550	550	49400000000000	4500000000000	IT-BOR1 - 23	0.125	720	200	737.539	204.893	776.768	204.893
IT-BOR1 - 24	rim		16.557	16210	801	7123000	1200	0.965	0.024	0.0178	0.00097	0.002577	3.3e-05	0.34397	0.0507	0.0022	0.000843	8.1e-05	17.91	0.97	0.97	16.59	0.22	0.24	17	1.6	2.5	218	94	95	81300000000000	1000000000000	IT-BOR1 - 24	0.002577	16.59	0.24	16.9121	0.250578	16.9857	0.250881
IT-BOR1 - 25	rim of 26		35.156	5240	250	2188000	369	1.959	0.033	0.01687	0.00098	0.002618	3.7e-05	-0.12295	0.0473	0.003	0.00085	0.00011	16.98	0.97	0.98	16.85	0.24	0.26	17.2	2.2	3	100	130	130	22300000000000	1000000000000	IT-BOR1 - 25	0.002618	16.85	0.26	17.3952	0.283243	17.4723	0.283503
IT-BOR1 - 26	rim of 25		23.135	4000	175	1586000	267	2.045	0.037	0.0162	0.0015	0.002634	5.2e-05	0.012655	0.0446	0.0042	0.00079	0.00013	16.3	1.5	1.5	16.96	0.34	0.35	15.9	2.6	3.2	-60	180	180	16700000000000	1000000000000	IT-BOR1 - 26	0.002634	16.96	0.35	17.5586	0.375753	17.6282	0.375947
IT-BOR1 - 27	rim		18.145	6790	291	2830000	478	1.833	0.055	0.0165	0.0011	0.002715	5.8e-05	-0.044222	0.0449	0.0031	0.000889	8.4e-05	16.6	1.1	1.1	17.48	0.38	0.39	18	1.7	2.6	-20	130	130	31500000000000	4600000000000	IT-BOR1 - 27	0.002715	17.48	0.39	17.9846	0.409889	18.0551	0.410056
IT-BOR1 - 28	rim		17.465	22430	1039	9830000	1661	0.998	0.039	0.0171	0.00066	0.002629	3.3e-05	0.15795	0.0472	0.0021	0.000819	3.9e-05	17.22	0.66	0.67	16.92	0.21	0.24	16.55	0.79	2	67	90	90	114900000000000	1600000000000	IT-BOR1 - 28	0.002629	16.92	0.24	17.1908	0.248225	17.2689	0.248519
IT-BOR1 - 29	rim	?young	32.661	11700	511	5100000	863	0.801	0.059	0.01588	0.00067	0.002512	2.9e-05	-0.048664	0.0457	0.0021	0.000823	5.1e-05	16	0.67	0.67	16.18	0.19	0.21	16.6	1	2.1	9	87	87	61100000000000	7800000000000	IT-BOR1 - 29	0.002512	16.18	0.21	16.5399	0.222901	16.6053	0.223259
IT-BOR1 - 30	rim		25.63	10700	528	4530000	766	1.36	0.014	0.01747	0.00087	0.002545	4e-05	0.082609	0.0489	0.0024	0.000816	5.4e-05	17.58	0.87	0.88	16.38	0.26	0.27	16.5	1.1	2.2	140	100	100	48700000000000	2600000000000	IT-BOR1 - 30	0.002545	16.38	0.27	16.7814	0.284542	16.8592	0.284815
IT-BOR1 - 31	rim of 32		19.96	8350	383	3240000	548	1.815	0.081	0.01736	0.00085	0.002699	5.1e-05	0.069853	0.0457	0.0031	0.001	0.00012	17.47	0.85	0.86	17.37	0.33	0.35	20.1	2.5	3.4	0	130	130	34900000000000	1200000000000	IT-BOR1 - 31	0.002699	17.37	0.35	17.8536	0.368572	17.9314	0.368759
IT-BOR1 - 32	rim of 31	disc.	33.115	6980	389	2977000	504	1.946	0.037	0.0193	0.0012	0.002557	5.1e-05	0.38673	0.0564	0.0035	0.00106	0.00011	19.4	1.2	1.2	16.46	0.33	0.34	21.3	2.2	3.2	460	130	130	30400000000000	1100000000000	IT-BOR1 - 32	0.002557	16.46	0.34	16.9411	0.358912	17.0159	0.359127
IT-BOR1 - 33	rim		27.218	4260	198	1617000	274	2.011	0.033	0.0183	0.0018	0.00281	4.5e-05	0.10824	0.0472	0.0045	0.00098	0.00014	18.4	1.7	1.7	18.09	0.29	0.31	19.9	2.9	3.7	80	180	180	18120000000000	980000000000	IT-BOR1 - 33	0.00281	18.09	0.31	18.7135	0.336982	18.7845	0.337171
IT-BOR1 - 34	rim	disc.	35.057	6960	1770	2119000	359.1	1.576	0.017	0.128	0.028	0.00361	0.00026	0.97628	0.233	0.038	0.00433	0.00081	122	25	25	23.2	1.6	1.6	87	16	19	2650	340	340	31400000000000	2600000000000	IT-BOR1 - 34	0.00361	23.2	1.6	23.8705	1.64999	23.9727	1.65001
IT-BOR1 - 35	rim		12.928	17700	807	7730000	1310	1.347	0.016	0.0173	0.0012	0.002705	5.5e-05	-0.15248	0.0466	0.0034	0.000852	4.4e-05	17.4	1.2	1.2	17.41	0.36	0.37	17.22	0.88	2.1	80	150	150	88000000000000	7000000000000	IT-BOR1 - 35	0.002705	17.41	0.37	17.7344	0.380844	17.811	0.381025
IT-BOR1 - 36	rim		35.156	15870	740	6490000	1101	1.549	0.047	0.01729	0.00054	0.002661	2.5e-05	-0.094171	0.0472	0.0016	0.000877	5e-05	17.4	0.54	0.55	17.13	0.16	0.19	17.7	1	2.2	68	68	68	72100000000000	4700000000000	IT-BOR1 - 36	0.002661	17.13	0.19	17.4829	0.202716	17.5565	0.203066
IT-BOR1 - 37	rim		27.671	14510	682	6160000	1045	0.8863	0.0086	0.01714	0.00077	0.002585	2.6e-05	0.27195	0.0478	0.002	0.000887	6.2e-05	17.26	0.77	0.77	16.64	0.17	0.2	17.9	1.3	2.4	93	86	86	72000000000000	2500000000000	IT-BOR1 - 37	0.002585	16.64	0.2	16.983	0.212048	17.0581	0.212403
IT-BOR1 - 38	rim		25.403	9630	444	3790000	644	1.295	0.094	0.01724	0.00095	0.002691	3.7e-05	0.19381	0.0465	0.0026	0.000932	8.2e-05	17.35	0.95	0.96	17.32	0.24	0.26	18.8	1.6	2.7	40	110	110	43800000000000	3800000000000	IT-BOR1 - 38	0.002691	17.32	0.26	17.7627	0.27659	17.8392	0.276841
IT-BOR1 - 39	rim of 40		22.001	7750	366	3290000	559	1.766	0.059	0.01739	0.00098	0.002676	5.5e-05	0.21442	0.0473	0.0027	0.000856	9.3e-05	17.51	0.97	0.98	17.23	0.35	0.37	17.3	1.9	2.7	80	110	110	35800000000000	1800000000000	IT-BOR1 - 39	0.002676	17.23	0.37	17.7053	0.388289	17.7751	0.38847
IT-BOR1 - 40	rim of 39		35.156	8810	417	3597000	611	2.216	0.049	0.01756	0.00076	0.002697	3.3e-05	0.049442	0.0474	0.0019	0.00088	7.7e-05	17.67	0.75	0.76	17.36	0.21	0.24	17.8	1.5	2.5	65	84	84	38220000000000	800000000000	IT-BOR1 - 40	0.002697	17.36	0.24	17.8274	0.258371	17.9024	0.258639
IT-BOR1 - 41	rim		35.156	14070	653	5680000	966	0.841	0.014	0.01755	0.0006	0.002722	2.3e-05	0.19459	0.0471	0.0017	0.000869	4.7e-05	17.66	0.6	0.61	17.52	0.15	0.18	17.55	0.96	2.2	66	71	71	71000000000000	3400000000000	IT-BOR1 - 41	0.002722	17.52	0.18	17.8836	0.193549	17.9594	0.1939
IT-BOR1 - 42	rim of 43		35.837	8000	405	3397000	578.2	1.381	0.012	0.01798	0.00085	0.002586	5.3e-05	0.14803	0.0514	0.0025	0.000914	5.6e-05	18.09	0.85	0.86	16.65	0.34	0.35	18.5	1.1	2.4	240	100	100	36740000000000	680000000000	IT-BOR1 - 42	0.002586	16.65	0.35	17.1049	0.367394	17.1762	0.367599
IT-BOR1 - 43	rim of 42		24.496	5970	292	2440000	416	1.748	0.033	0.0173	0.0011	0.002586	3.4e-05	0.17206	0.0485	0.0032	0.00091	0.00012	17.4	1.1	1.1	16.65	0.22	0.24	18.4	2.4	3.2	170	140	140	25700000000000	1200000000000	IT-BOR1 - 43	0.002586	16.65	0.24	17.1648	0.261736	17.236	0.262024
IT-BOR1 - 44	rim of 44		32.434	14400	712	6080000	1040	2.601	0.033	0.01778	0.00058	0.002605	2.7e-05	-0.22136	0.049	0.0017	0.000954	7.7e-05	17.89	0.58	0.58	16.77	0.17	0.2	19.3	1.6	2.7	140	71	72	62300000000000	7000000000000	IT-BOR1 - 44	0.002605	16.77	0.2	17.1398	0.213514	17.2134	0.213862
IT-BOR1 - 45	rim of 43		30.62	9900	438	4180000	712	2.128	0.036	0.01635	0.00093	0.002653	3.5e-05	0.079391	0.0454	0.0025	0.00087	0.00011	16.47	0.93	0.93	17.08	0.22	0.25	17.6	2.1	2.9	-20	110	110	44500000000000	5400000000000	IT-BOR1 - 45	0.002653	17.08	0.25	17.5139	0.266281	17.5859	0.266549
IT-BOR1 - 46	rim		17.918	4880	213	1930000	330	1.895	0.048	0.0164	0.0014	0.002613	5.7e-05	0.17219	0.0435	0.0041	0.00104	0.00015	16.5	1.4	1.4	16.83	0.37	0.38	20.9	3	3.8	-80	170	170	20500000000000	2000000000000	IT-BOR1 - 46	0.002613	16.83	0.38	17.3889	0.403429	17.4534	0.403611
IT-BOR1 - 47	rim		31.527	25450	1178	10370000	1770	0.763	0.012	0.01723	0.00052	0.002683	2.8e-05	0.15785	0.0467	0.0013	0.00094	3.4e-05	17.34	0.52	0.53	17.27	0.18	0.21	18.98	0.69	2.2	49	57	57	130200000000000	3300000000000	IT-BOR1 - 47	0.002683	17.27	0.21	17.5253	0.217659	17.6005	0.21798
IT-BOR1 - 48	rim		30.393	7620	354	3170000	541	1.59	0.14	0.0167	0.0011	0.002593	4.3e-05	0.18919	0.0467	0.0031	0.000963	9.1e-05	17	1.1	1.1	16.7	0.28	0.29	19.4	1.8	2.9	60	130	130	34200000000000	1600000000000	IT-BOR1 - 48	0.002593	16.7	0.29	17.1683	0.308079	17.2344	0.308322
IT-BOR1 - 49	rim		35.837	4430	200	1880000	322	1.852	0.018	0.01591	0.00084	0.002586	4.7e-05	0.20336	0.0446	0.0026	0.000751	9.4e-05	16.02	0.84	0.84	16.65	0.3	0.32	15.2	1.9	2.6	-40	110	110	20000000000000	2100000000000	IT-BOR1 - 49	0.002586	16.65	0.32	17.2071	0.343392	17.2782	0.343611
IT-BOR1 - 50	rim		35.156	7040	322	2960000	507	1.388	0.048	0.01678	0.0009	0.002583	3.7e-05	-0.0054428	0.0472	0.0027	0.000842	8.2e-05	16.89	0.9	0.91	16.63	0.24	0.26	17	1.7	2.5	70	110	110	32500000000000	2400000000000	IT-BOR1 - 50	0.002583	16.63	0.26	17.1049	0.278774	17.1768	0.279044
IT-BOR1 - 51	rim		5.6703	7560	366	2865000	490.2	1.292	0.028	0.0179	0.0016	0.002614	7.3e-05	-0.0012823	0.0498	0.0049	0.00093	0.0002	18	1.6	1.6	16.83	0.47	0.48	18.9	4	4.5	180	210	210	32380000000000	460000000000	IT-BOR1 - 51	0.002614	16.83	0.48	17.3112	0.500129	17.3824	0.500276
IT-BOR1 - 52	rim		14.743	4280	196	1707000	292.1	1.897	0.023	0.0163	0.0021	0.002545	6.1e-05	-0.0052753	0.0465	0.0059	0.00073	0.00014	16.4	2.1	2.1	16.39	0.39	0.4	14.8	2.7	3.2	40	230	230	17740000000000	420000000000	IT-BOR1 - 52	0.002545	16.39	0.4	16.9584	0.424502	17.0258	0.424685
IT-BOR1 - 53	rim	old	23.362	7790	357	2688000	460	1.418	0.039	0.0194	0.0016	0.003027	6.1e-05	0.16385	0.0454	0.0036	0.00121	0.00011	19.5	1.6	1.6	19.49	0.39	0.41	24.4	2.1	3.5	60	160	160	34600000000000	1300000000000	IT-BOR1 - 53	0.003027	19.49	0.41	20.0343	0.431004	20.1	0.431132
IT-BOR1 - 54	rim		34.929	6640	288	2740000	472	1.497	0.028	0.01649	0.00096	0.002658	3.2e-05	0.010098	0.0457	0.0029	0.000964	8.8e-05	16.8	1	1	17.11	0.21	0.23	19.5	1.8	2.8	30	120	120	30900000000000	2200000000000	IT-BOR1 - 54	0.002658	17.11	0.23	17.6073	0.250632	17.6814	0.250917
IT-BOR1 - 55	rim		28.125	6420	300	2662000	458	1.211	0.032	0.0174	0.0011	0.002704	4.1e-05	0.082557	0.0469	0.0027	0.000918	8.3e-05	17.5	1.1	1.1	17.41	0.26	0.28	18.5	1.7	2.7	60	110	110	31220000000000	890000000000	IT-BOR1 - 55	0.002704	17.41	0.28	17.9142	0.29999	17.9839	0.30022
IT-MU2 - 1	rim		34.249	10470	484	4230000	730	1.636	0.052	0.01776	0.00088	0.002706	3.2e-05	0.0095163	0.0471	0.0023	0.000944	7.3e-05	17.87	0.88	0.88	17.42	0.21	0.23	19.1	1.5	2.6	81	99	99	47600000000000	1700000000000	IT-MU2 - 1	0.002706	17.42	0.23	17.8508	0.246315	17.9236	0.246594
IT-MU2 - 2	rim		33.342	9280	402	3870000	667	1.944	0.043	0.01688	0.0009	0.002631	4e-05	0.32926	0.0458	0.0021	0.000887	7.9e-05	17	0.89	0.9	16.94	0.26	0.28	17.9	1.6	2.6	13	89	89	41900000000000	4000000000000	IT-MU2 - 2	0.002631	16.94	0.28	17.3805	0.296438	17.4511	0.296684
IT-MU2 - 3	core		24.269	4870	239	2050000	353	1.714	0.018	0.0184	0.0015	0.00273	5.1e-05	0.15541	0.0481	0.0037	0.00087	0.00011	18.5	1.5	1.5	17.57	0.33	0.35	17.5	2.3	3	110	150	150	23300000000000	2100000000000	IT-MU2 - 3	0.00273	17.57	0.35	18.1307	0.372952	18.2078	0.373134
IT-MU2 - 4	rim	disc.	25.63	8300	423	3270000	565	1.691	0.022	0.0195	0.0013	0.002696	4.4e-05	0.19047	0.0522	0.0035	0.000971	8.9e-05	19.6	1.3	1.3	17.36	0.28	0.3	19.6	1.8	2.8	270	140	140	36300000000000	2300000000000	IT-MU2 - 4	0.002696	17.36	0.3	17.8364	0.318199	17.9048	0.318416
IT-MU2 - 5	rim		13.155	9900	465	3891000	672.5	1.003	0.018	0.01689	0.00075	0.002552	5.1e-05	-0.016066	0.0486	0.0028	0.000903	7e-05	17	0.74	0.75	16.43	0.33	0.35	18.2	1.4	2.5	120	120	120	45300000000000	1100000000000	IT-MU2 - 5	0.002552	16.43	0.35	16.8445	0.365369	16.9172	0.365581
IT-MU2 - 6	rim		34.929	11080	521	4420000	765	1.676	0.033	0.01795	0.00068	0.002744	2.8e-05	-0.095768	0.0466	0.0019	0.000881	7.1e-05	18.06	0.68	0.68	17.67	0.18	0.21	17.8	1.4	2.5	44	79	79	50800000000000	3500000000000	IT-MU2 - 6	0.002744	17.67	0.21	18.0955	0.226394	18.1625	0.226689
IT-MU2 - 7	rim		19.96	16600	783	6690000	1157	0.835	0.016	0.01678	0.00077	0.002617	3.2e-05	0.35303	0.0471	0.0021	0.000949	5.7e-05	16.89	0.77	0.77	16.85	0.21	0.23	19.2	1.2	2.4	59	90	91	80700000000000	6400000000000	IT-MU2 - 7	0.002617	16.85	0.23	17.1783	0.240887	17.2491	0.241193
IT-MU2 - 8	rim of 9		35.156	15760	737	6550000	1133	1.07	0.02	0.01705	0.00056	0.002632	3.1e-05	0.074106	0.047	0.0017	0.000831	3.7e-05	17.17	0.56	0.56	16.95	0.2	0.22	16.79	0.74	2	59	71	71	77100000000000	4100000000000	IT-MU2 - 8	0.002632	16.95	0.22	17.2879	0.231439	17.355	0.231753
IT-MU2 - 9	rim of 8	disc.	35.046	11050	811	4490000	777	1.385	0.029	0.0284	0.0019	0.002719	3.2e-05	0.074646	0.0738	0.0047	0.001193	8.8e-05	28.4	1.9	1.9	17.5	0.21	0.23	24.1	1.8	3.2	1070	130	130	52700000000000	3900000000000	IT-MU2 - 9	0.002719	17.5	0.23	17.915	0.245365	17.9915	0.245643
IT-MU2 - 10	rim		14.743	16160	780	7240000	1255	1.117	0.034	0.0174	0.001	0.002616	3.6e-05	0.26398	0.0482	0.0028	0.000773	6.7e-05	17.5	1	1	16.84	0.23	0.26	15.6	1.4	2.2	120	120	120	84000000000000	1200000000000	IT-MU2 - 10	0.002616	16.84	0.26	17.1615	0.270433	17.2359	0.270705
IT-MU2 - 11	rim		35.156	9590	457	3960000	686	1.469	0.012	0.01752	0.00081	0.002659	2.9e-05	0.042	0.0484	0.0025	0.000894	7.2e-05	17.63	0.81	0.81	17.12	0.18	0.21	18.1	1.4	2.5	120	100	100	44700000000000	2200000000000	IT-MU2 - 11	0.002659	17.12	0.21	17.5541	0.22707	17.6247	0.227384
IT-MU2 - 12	rim		33.115	9830	453	3980000	690	2.012	0.051	0.01793	0.00092	0.002708	4.1e-05	0.013968	0.0479	0.0025	0.000873	5.8e-05	18.04	0.92	0.92	17.43	0.26	0.28	17.6	1.2	2.3	100	100	100	43900000000000	4400000000000	IT-MU2 - 12	0.002708	17.43	0.28	17.8751	0.296508	17.9509	0.296739
IT-MU2 - 13	rim		20.867	16640	785	6560000	1138	0.682	0.051	0.01739	0.0008	0.002628	5.8e-05	0.29629	0.0479	0.0021	0.000991	6.5e-05	17.5	0.8	0.81	16.92	0.37	0.39	20	1.3	2.6	101	90	90	86500000000000	2600000000000	IT-MU2 - 13	0.002628	16.92	0.39	17.2381	0.400933	17.3096	0.401115
IT-MU2 - 14	rim		22.681	10030	465	4140000	719	1.893	0.066	0.0174	0.001	0.002725	3.9e-05	-0.060151	0.0458	0.0026	0.00094	0.0001	17.5	1	1	17.54	0.25	0.27	18.9	2.1	3	10	110	110	46800000000000	2600000000000	IT-MU2 - 14	0.002725	17.54	0.27	17.9767	0.286074	18.0517	0.286311
IT-MU2 - 15	rim of 16	disc.	34.997	7920	1335	2340000	407	2.08	0.13	0.096	0.013	0.00372	0.0001	0.88407	0.183	0.022	0.00493	0.00079	93	12	12	23.96	0.66	0.68	99	16	19	2660	220	220	36400000000000	4700000000000	IT-MU2 - 15	0.00372	23.96	0.68	24.6169	0.707086	24.664	0.707137
IT-MU2 - 16	rim of 15	disc.	35.044	18800	1329	7390000	1280	1.267	0.041	0.0267	0.0011	0.002858	4.6e-05	0.64642	0.0681	0.0023	0.001195	8.1e-05	26.8	1	1.1	18.4	0.3	0.32	24.1	1.6	3.2	870	67	67	91300000000000	7800000000000	IT-MU2 - 16	0.002858	18.4	0.32	18.7361	0.330759	18.8061	0.330945
IT-MU2 - 17	rim		15.423	8440	414	3330000	580	1.497	0.063	0.0183	0.0017	0.002603	5.1e-05	0.33752	0.052	0.0042	0.001	0.00013	18.4	1.7	1.7	16.76	0.33	0.34	20.2	2.5	3.4	260	170	170	37100000000000	3200000000000	IT-MU2 - 17	0.002603	16.76	0.34	17.2163	0.357361	17.2868	0.357569
IT-MU2 - 18	rim of 19		12.248	14880	712	6470000	1126	1.246	0.042	0.0181	0.0011	0.002752	7.6e-05	0.14559	0.0471	0.0028	0.000876	8.8e-05	18.2	1.1	1.1	17.72	0.49	0.5	17.7	1.8	2.7	70	120	120	77700000000000	3300000000000	IT-MU2 - 18	0.002752	17.72	0.5	18.0719	0.51334	18.1405	0.513469
IT-MU2 - 19	rim of 18		30.62	9270	439	3730000	650	1.148	0.031	0.0175	0.0011	0.002647	6.2e-05	0.38244	0.0479	0.0028	0.00102	8.2e-05	17.7	1.1	1.1	17.04	0.4	0.41	20.6	1.7	2.8	100	110	110	45100000000000	4800000000000	IT-MU2 - 19	0.002647	17.04	0.41	17.4706	0.426398	17.5441	0.426566
IT-MU2 - 20	rim		22.001	11290	519	4730000	824	1.067	0.083	0.0178	0.0011	0.002684	4e-05	-0.16134	0.049	0.0034	0.000853	4.9e-05	17.9	1.1	1.1	17.28	0.26	0.28	17.2	1	2.2	140	140	140	57800000000000	3700000000000	IT-MU2 - 20	0.002684	17.28	0.28	17.6739	0.293803	17.7453	0.294041
IT-MU2 - 21	rim		34.929	8790	412	3450000	602	1.39	0.06	0.018	0.001	0.002735	3.7e-05	0.17986	0.0478	0.0028	0.00096	9.6e-05	18.1	1	1	17.6	0.24	0.26	19.4	1.9	2.9	100	120	120	41100000000000	5400000000000	IT-MU2 - 21	0.002735	17.6	0.26	18.0611	0.277566	18.1405	0.277808
IT-MU2 - 22	inner part of 23		18.826	2760	127	1238000	216	3.112	0.041	0.0171	0.0023	0.002607	5.9e-05	0.060251	0.0475	0.0064	0.001	0.00024	17.2	2.3	2.3	16.79	0.38	0.39	20.2	4.8	5.3	60	250	250	12670000000000	720000000000	IT-MU2 - 22	0.002607	16.79	0.39	17.43	0.418646	17.4958	0.418823
IT-MU2 - 23	inner part of 22		31.3	2230	99	871000	152	3.07	0.13	0.0168	0.0018	0.00273	6.7e-05	2.1083e-06	0.0462	0.0053	0.00069	0.00018	16.9	1.8	1.8	17.58	0.43	0.45	13.9	3.7	4	20	200	200	9550000000000	750000000000	IT-MU2 - 23	0.00273	17.58	0.45	18.3012	0.483663	18.3676	0.483803
IT-MU2 - 24	rim		25.176	6590	329	2650000	463	2.23	0.051	0.0178	0.0012	0.002628	3.7e-05	0.077977	0.0496	0.0034	0.00092	0.00013	17.9	1.2	1.2	16.92	0.24	0.26	18.5	2.6	3.3	170	140	140	28400000000000	1300000000000	IT-MU2 - 24	0.002628	16.92	0.26	17.4261	0.280618	17.4973	0.280878
IT-MU2 - 25	rim		11.341	7060	348	2617000	457.4	1.559	0.023	0.0188	0.0017	0.002722	5.5e-05	-0.00049282	0.0502	0.0046	0.00113	0.00015	19	1.7	1.7	17.53	0.36	0.37	22.8	2.9	3.9	190	190	190	30530000000000	810000000000	IT-MU2 - 25	0.002722	17.53	0.37	18.0416	0.39013	18.1069	0.390305
IT-MU2 - 26	rim		16.331	55600	2600	20300000	3560	0.838	0.031	0.01813	0.00071	0.002781	3.6e-05	0.32154	0.0474	0.0016	0.000956	4e-05	18.24	0.71	0.72	17.91	0.23	0.26	19.31	0.8	2.3	60	75	75	271000000000000	20000000000000	IT-MU2 - 26	0.002781	17.91	0.26	18.0471	0.263638	18.1124	0.263885
IT-MU2 - 27	rim		34.703	11510	533	4570000	799	1.42	0.018	0.01748	0.00053	0.002714	3.1e-05	0.41231	0.0468	0.0013	0.000934	5.5e-05	17.59	0.53	0.54	17.47	0.2	0.22	18.9	1.1	2.4	51	57	57	55200000000000	5300000000000	IT-MU2 - 27	0.002714	17.47	0.22	17.8762	0.235051	17.9505	0.235342
IT-MU2 - 28	rim of 29		35.61	10560	492	4330000	758	1.749	0.03	0.01752	0.00086	0.00271	3.3e-05	0.16761	0.0462	0.0022	0.000921	8e-05	17.64	0.86	0.86	17.45	0.21	0.24	18.6	1.6	2.6	44	93	93	49400000000000	5400000000000	IT-MU2 - 28	0.00271	17.45	0.24	17.8751	0.255796	17.9435	0.256064
IT-MU2 - 29	rim of 28		27.218	5340	231	2130000	373	1.59	0.015	0.0163	0.0013	0.002664	4.2e-05	0.25224	0.0443	0.0034	0.00095	0.00011	16.4	1.3	1.3	17.15	0.27	0.29	19.2	2.3	3.2	-40	140	140	24000000000000	1700000000000	IT-MU2 - 29	0.002664	17.15	0.29	17.6922	0.31239	17.7648	0.312617
IT-MU2 - 30	rim	disc.	9.5262	6960	361	3230000	566	1.346	0.042	0.019	0.0022	0.002671	8.7e-05	0.13778	0.0519	0.0061	0.00071	0.00013	19.1	2.2	2.2	17.19	0.56	0.57	14.4	2.7	3.1	260	240	240	37000000000000	1700000000000	IT-MU2 - 30	0.002671	17.19	0.57	17.6585	0.590666	17.7363	0.590786
IT-MU2 - 31	rim		30.62	13700	650	5720000	1000	1.059	0.086	0.0176	0.00099	0.002607	4.3e-05	0.16142	0.0489	0.0028	0.000835	6.5e-05	17.71	0.98	0.99	16.79	0.27	0.29	16.9	1.3	2.3	140	110	110	70000000000000	12000000000000	IT-MU2 - 31	0.002607	16.79	0.29	17.1408	0.301819	17.2071	0.302065
IT-MU2 - 32	rim		29.486	7110	350	2990000	525	1.426	0.021	0.01802	0.00095	0.002679	4.3e-05	0.040125	0.0485	0.0025	0.000883	9e-05	18.13	0.94	0.95	17.25	0.28	0.3	17.8	1.8	2.7	130	100	100	34500000000000	2600000000000	IT-MU2 - 32	0.002679	17.25	0.3	17.7322	0.318584	17.8013	0.318804
IT-MU2 - 33	rim	old	12.248	13840	598	4530000	796	1.282	0.017	0.0189	0.0015	0.003092	5.8e-05	0.077407	0.0441	0.0036	0.001192	8.4e-05	19	1.5	1.5	19.9	0.37	0.39	24.1	1.7	3.2	-60	150	150	61800000000000	4200000000000	IT-MU2 - 33	0.003092	19.9	0.39	20.3404	0.405341	20.4142	0.405471
IT-MU2 - 34	rim		35.156	13430	616	5520000	969	1.196	0.041	0.01684	0.0007	0.002616	3e-05	0.33927	0.0465	0.0018	0.000926	4.5e-05	16.95	0.7	0.7	16.84	0.19	0.22	18.71	0.9	2.3	40	77	77	65100000000000	2300000000000	IT-MU2 - 34	0.002616	16.84	0.22	17.204	0.232827	17.2783	0.233143
IT-MU2 - 35	rim		25.403	34080	1573	12620000	2219	1.273	0.024	0.01839	0.00077	0.002816	4.2e-05	0.17721	0.0468	0.0019	0.001113	7e-05	18.5	0.77	0.77	18.13	0.27	0.29	22.5	1.4	2.9	52	82	82	157200000000000	3200000000000	IT-MU2 - 35	0.002816	18.13	0.29	18.3646	0.296704	18.4348	0.296918
IT-MU2 - 36	rim		22.001	17750	822	7750000	1362	1.804	0.025	0.01714	0.00056	0.002651	3.5e-05	0.32945	0.0471	0.0017	0.000905	8.2e-05	17.25	0.55	0.56	17.07	0.22	0.25	18.3	1.7	2.6	52	75	75	86500000000000	5600000000000	IT-MU2 - 36	0.002651	17.07	0.25	17.3909	0.26038	17.4602	0.260655
IT-MU2 - 37	rim		34.929	13240	602	5520000	971	1.362	0.013	0.01682	0.00077	0.002636	2.5e-05	0.093823	0.0461	0.0021	0.000887	5.4e-05	16.94	0.77	0.78	16.97	0.16	0.19	17.9	1.1	2.3	27	89	89	63800000000000	4100000000000	IT-MU2 - 37	0.002636	16.97	0.19	17.3402	0.203738	17.4131	0.204094
IT-MU2 - 38	rim of 39		25.857	28900	1341	11740000	2067	1.285	0.033	0.01792	0.00059	0.002751	2.6e-05	0.25824	0.0474	0.0015	0.000938	4.5e-05	18.03	0.58	0.59	17.71	0.17	0.2	18.95	0.91	2.3	76	66	66	142200000000000	1700000000000	IT-MU2 - 38	0.002751	17.71	0.2	17.9565	0.207339	18.0288	0.20766
IT-MU2 - 39	rim of 38		31.074	11230	515	4600000	810	1.666	0.016	0.01697	0.00091	0.002651	3.3e-05	-0.096194	0.0462	0.0026	0.000904	7e-05	17.08	0.91	0.92	17.06	0.21	0.24	18.3	1.4	2.5	50	110	110	51800000000000	3300000000000	IT-MU2 - 39	0.002651	17.06	0.24	17.4675	0.254906	17.5469	0.255187
IT-MU2 - 40	core of 38		36.063	9840	475	4100000	722	1.816	0.046	0.0178	0.00085	0.002653	2.9e-05	0.094664	0.0482	0.0024	0.001019	7.4e-05	17.92	0.84	0.85	17.08	0.19	0.21	20.6	1.5	2.8	110	100	100	45800000000000	3700000000000	IT-MU2 - 40	0.002653	17.08	0.21	17.509	0.226756	17.581	0.227071
IT-MU2 - 41	rim of 42		35.156	6300	289	2590000	457	1.944	0.025	0.018	0.0011	0.002722	4.1e-05	0.24349	0.0479	0.0029	0.00105	9.8e-05	18.1	1.1	1.1	17.52	0.26	0.28	21.2	2	3.1	100	120	120	29200000000000	2300000000000	IT-MU2 - 41	0.002722	17.52	0.28	18.0392	0.300873	18.1148	0.301099
IT-MU2 - 42	inner part of 41		35.383	3370	150	1380000	244	2.445	0.091	0.0179	0.0014	0.002693	5.1e-05	-0.034749	0.0484	0.004	0.00087	0.00015	18	1.4	1.4	17.34	0.33	0.35	17.6	3	3.6	110	160	160	15700000000000	2400000000000	IT-MU2 - 42	0.002693	17.34	0.35	17.963	0.377066	18.0318	0.37725
IT-MU2 - 43	rim	disc.	34.703	10050	629	3990000	705	2.128	0.024	0.0247	0.0019	0.002816	4.2e-05	0.61236	0.0635	0.0043	0.0013	0.00016	24.7	1.9	1.9	18.13	0.27	0.29	26.4	3.1	4.3	720	140	140	46100000000000	3100000000000	IT-MU2 - 43	0.002816	18.13	0.29	18.5842	0.306685	18.654	0.306892
IT-MU2 - 44	rim		35.156	10580	479	4420000	783	1.729	0.022	0.01666	0.00092	0.002622	3.4e-05	0.31442	0.0459	0.0024	0.00085	6.5e-05	16.77	0.92	0.92	16.88	0.22	0.24	17.2	1.3	2.3	20	100	100	48800000000000	3700000000000	IT-MU2 - 44	0.002622	16.88	0.24	17.2933	0.255286	17.3661	0.255573
IT-MU2 - 45	rim		35.837	11900	537	5050000	897	1.491	0.051	0.01716	0.00066	0.002596	3.6e-05	0.062413	0.0471	0.002	0.000842	6.3e-05	17.27	0.66	0.66	16.71	0.23	0.25	17	1.3	2.3	63	83	83	58100000000000	6300000000000	IT-MU2 - 45	0.002596	16.71	0.25	17.0901	0.263408	17.1658	0.263691
IT-MU2 - 46	rim of 47		28.805	4030	191	1580000	281	1.717	0.021	0.0181	0.0014	0.002712	6.1e-05	-0.049364	0.0483	0.0039	0.00094	0.00013	18.2	1.4	1.4	17.46	0.39	0.41	19	2.6	3.3	130	160	160	18500000000000	1400000000000	IT-MU2 - 46	0.002712	17.46	0.41	18.0581	0.435516	18.1292	0.435673
IT-MU2 - 47	core of 46		12.702	12390	555	5480000	974	0.987	0.049	0.0166	0.0013	0.002656	5.4e-05	0.49064	0.0453	0.0033	0.000832	5.7e-05	16.7	1.3	1.3	17.1	0.35	0.36	16.8	1.1	2.2	-10	140	140	67800000000000	1800000000000	IT-MU2 - 47	0.002656	17.1	0.36	17.4627	0.3726	17.5341	0.372792
IT-MU2 - 48	rim		35.156	10510	495	4310000	766	1.771	0.014	0.01765	0.00078	0.002653	3.5e-05	0.25014	0.0472	0.0021	0.00084	5.9e-05	17.77	0.78	0.79	17.08	0.23	0.25	17	1.2	2.2	71	88	88	49100000000000	2000000000000	IT-MU2 - 48	0.002653	17.08	0.25	17.4971	0.26532	17.5692	0.26559
IT-MU2 - 49	rim of 50		35.156	10190	467	4290000	764	1.538	0.024	0.01669	0.00084	0.002601	3.4e-05	-0.091902	0.047	0.0026	0.000858	6.6e-05	16.81	0.84	0.85	16.75	0.22	0.24	17.3	1.3	2.4	80	110	110	48200000000000	2300000000000	IT-MU2 - 49	0.002601	16.75	0.24	17.1621	0.255262	17.2298	0.255554
IT-MU2 - 50	rim of 49		28.579	7380	345	2980000	530	1.482	0.019	0.01761	0.00075	0.002662	3.2e-05	0.25822	0.0485	0.0021	0.000856	8.6e-05	17.72	0.75	0.76	17.14	0.2	0.23	17.3	1.7	2.6	122	89	90	34400000000000	1800000000000	IT-MU2 - 50	0.002662	17.14	0.23	17.6196	0.249455	17.6894	0.249739
IT-MU2 - 51	rim		35.156	7470	344	3080000	550	1.715	0.026	0.01755	0.00094	0.002696	4.1e-05	0.20652	0.0473	0.0024	0.00095	0.00011	17.66	0.94	0.95	17.35	0.26	0.28	19.2	2.1	3	70	100	100	35700000000000	3700000000000	IT-MU2 - 51	0.002696	17.35	0.28	17.8291	0.298497	17.9077	0.298729
IT-PUB - 1	rim		34.929	7360	337	3010000	537	2.355	0.034	0.01693	0.00098	0.002662	4.4e-05	0.081396	0.0458	0.0027	0.00085	0.00012	17.04	0.98	0.98	17.14	0.28	0.3	17.1	2.4	3.1	0	110	110	33200000000000	1900000000000	IT-PUB - 1	0.002662	17.14	0.3	17.6258	0.318843	17.6955	0.319065
IT-PUB - 2	rim		9.753	13600	628	6130000	1094	1.012	0.023	0.0166	0.0015	0.002667	7.4e-05	-0.10984	0.0469	0.0048	0.000853	5.8e-05	16.7	1.5	1.5	17.17	0.47	0.48	17.2	1.2	2.3	50	200	200	75300000000000	2900000000000	IT-PUB - 2	0.002667	17.17	0.48	17.5163	0.493113	17.5885	0.493256
IT-PUB - 3	inner part		23.815	13100	624	5590000	1000	1.25	0.11	0.01755	0.00078	0.002635	5.3e-05	-0.0054459	0.0484	0.0026	0.000909	5.3e-05	17.67	0.78	0.78	16.96	0.34	0.35	18.4	1.1	2.3	120	110	110	67400000000000	8400000000000	IT-PUB - 3	0.002635	16.96	0.35	17.3207	0.362492	17.3973	0.362692
IT-PUB - 4	rim		33.795	17570	785	7310000	1305	0.898	0.023	0.01632	0.00062	0.002602	3e-05	0.26697	0.0453	0.0017	0.000861	3.7e-05	16.43	0.62	0.63	16.75	0.19	0.22	17.39	0.75	2.1	-8	73	73	90400000000000	4200000000000	IT-PUB - 4	0.002602	16.75	0.22	17.0576	0.229986	17.132	0.230309
IT-PUB - 5	rim	disc.	8.1653	7320	378	3180000	568	0.953	0.019	0.0198	0.0016	0.00276	0.0001	-0.085713	0.0526	0.0051	0.00095	0.00011	19.9	1.6	1.6	17.75	0.64	0.65	19.2	2.3	3.1	290	210	210	41300000000000	2500000000000	IT-PUB - 5	0.00276	17.75	0.65	18.2142	0.67143	18.3045	0.671529
IT-PUB - 6	rim		35.156	15050	692	6320000	1130	1.185	0.014	0.01693	0.00052	0.002634	3.2e-05	0.3458	0.0465	0.0012	0.000855	5.1e-05	17.05	0.52	0.53	16.96	0.21	0.23	17.3	1	2.2	30	53	53	75100000000000	3800000000000	IT-PUB - 6	0.002634	16.96	0.23	17.3026	0.24157	17.3725	0.24187
IT-PUB - 7	rim		34.929	28350	1391	12250000	2191	0.9114	0.0083	0.01738	0.00062	0.002526	3e-05	0.37363	0.0494	0.0016	0.00087	2.7e-05	17.49	0.62	0.63	16.26	0.19	0.22	17.58	0.55	2.1	183	74	74	147900000000000	4100000000000	IT-PUB - 7	0.002526	16.26	0.22	16.4801	0.226328	16.5559	0.226677
IT-PUB - 8	inner part		20.867	4175	195	1615000	289.1	1.804	0.078	0.0176	0.0019	0.002693	6.1e-05	0.036211	0.0473	0.0053	0.001	0.0002	17.7	1.9	1.9	17.34	0.39	0.41	20.2	4	4.6	110	220	220	18620000000000	380000000000	IT-PUB - 8	0.002693	17.34	0.41	17.9328	0.435291	18.0017	0.435451
IT-PUB - 9	rim		19.506	8020	381	3220000	577	1.931	0.041	0.0187	0.0012	0.00279	4.3e-05	0.050234	0.0493	0.0034	0.00092	0.0001	18.8	1.2	1.2	17.96	0.28	0.3	18.5	2	2.9	150	140	140	39600000000000	4200000000000	IT-PUB - 9	0.00279	17.96	0.3	18.4372	0.317985	18.5099	0.318188
IT-PUB - 10	rim		19.733	14410	662	6190000	1109	1.297	0.058	0.01717	0.00099	0.002693	4.7e-05	0.1218	0.0472	0.0028	0.000847	6.1e-05	17.29	0.98	0.99	17.34	0.3	0.32	17.1	1.2	2.3	70	120	120	73300000000000	1400000000000	IT-PUB - 10	0.002693	17.34	0.32	17.6944	0.331892	17.7637	0.332101
IT-PUB - 11	rim		25.857	8270	370	3440000	617	1.623	0.028	0.0171	0.0011	0.002702	3.8e-05	0.33886	0.0464	0.003	0.000814	9.8e-05	17.2	1.1	1.1	17.39	0.24	0.27	16.4	2	2.7	40	120	120	40500000000000	2800000000000	IT-PUB - 11	0.002702	17.39	0.27	17.8482	0.287351	17.9253	0.287591
IT-PUB - 12	rim		35.156	7190	337	2836000	509	1.578	0.054	0.0181	0.0011	0.00276	3.8e-05	0.21636	0.0478	0.0029	0.000909	7.4e-05	18.2	1.1	1.1	17.77	0.24	0.27	18.4	1.5	2.5	110	110	110	34100000000000	1100000000000	IT-PUB - 12	0.00276	17.77	0.27	18.2688	0.289641	18.3386	0.289869
IT-PUB - 13	rim		35.156	6560	299	2581000	463.3	1.735	0.075	0.0175	0.0012	0.002754	4e-05	-0.0044932	0.0459	0.0032	0.000953	8.4e-05	17.6	1.2	1.2	17.73	0.26	0.28	19.2	1.7	2.7	40	130	130	30540000000000	740000000000	IT-PUB - 13	0.002754	17.73	0.28	18.2474	0.300666	18.3186	0.300887
IT-PUB - 14	inner part		35.156	4370	206	1787000	321	1.378	0.032	0.0179	0.0014	0.002655	4.8e-05	0.096539	0.0487	0.0038	0.00091	8.2e-05	18	1.4	1.4	17.09	0.31	0.32	18.4	1.6	2.6	150	150	150	21110000000000	720000000000	IT-PUB - 14	0.002655	17.09	0.32	17.6525	0.343458	17.7273	0.343666
IT-PUB - 15	inner part		34.929	9090	433	3470000	623	1.53	0.056	0.01862	0.00085	0.002837	3.5e-05	0.23978	0.047	0.002	0.000998	8.1e-05	18.73	0.85	0.86	18.26	0.22	0.25	20.2	1.6	2.8	62	83	83	43300000000000	2800000000000	IT-PUB - 15	0.002837	18.26	0.25	18.7289	0.26797	18.8038	0.268204
IT-PUB - 16	rim		26.991	11420	544	4490000	808	1.57	0.1	0.01751	0.00071	0.002683	3.5e-05	0.29023	0.0472	0.0018	0.000897	7.3e-05	17.62	0.71	0.72	17.27	0.23	0.25	18.1	1.5	2.5	70	77	77	52500000000000	1500000000000	IT-PUB - 16	0.002683	17.27	0.25	17.6802	0.264876	17.7552	0.265141
IT-PUB - 17	rim		35.156	6960	325	2780000	500	1.307	0.012	0.0177	0.001	0.002751	5.4e-05	0.093878	0.0465	0.0027	0.000887	6e-05	17.8	1	1.1	17.71	0.34	0.36	17.9	1.2	2.3	40	110	110	34500000000000	2100000000000	IT-PUB - 17	0.002751	17.71	0.36	18.2051	0.37906	18.2771	0.379235
IT-PUB - 18	rim of 19		30.393	4470	191	1700000	305	2.9	0.095	0.0171	0.0014	0.002862	4.5e-05	0.12718	0.0437	0.0035	0.00099	0.00014	17.2	1.4	1.4	18.42	0.29	0.31	20	2.7	3.5	-60	140	140	19400000000000	2400000000000	IT-PUB - 18	0.002862	18.42	0.31	19.0421	0.336694	19.1175	0.336877
IT-PUB - 19	rim of 18		22.455	6130	291	2488000	448	1.991	0.023	0.0184	0.0015	0.002762	4.7e-05	-0.078558	0.0485	0.0045	0.00086	0.00012	18.5	1.5	1.5	17.78	0.3	0.32	17.5	2.4	3.1	120	180	180	29400000000000	1100000000000	IT-PUB - 19	0.002762	17.78	0.32	18.3057	0.340792	18.3783	0.340986
IT-PUB - 20	rim		30.62	4600	207	1860000	335	2.101	0.019	0.0165	0.0013	0.002664	5.2e-05	0.22294	0.046	0.0039	0.00081	0.00011	16.6	1.3	1.3	17.15	0.34	0.35	16.3	2.2	2.9	20	150	150	21000000000000	1700000000000	IT-PUB - 20	0.002664	17.15	0.35	17.7154	0.373512	17.788	0.373702
IT-PUB - 21	inner part		31.3	5570	259	2232000	402	1.993	0.099	0.0174	0.0011	0.0027	4.1e-05	-0.086822	0.0468	0.0029	0.00101	0.00013	17.5	1	1.1	17.38	0.26	0.28	20.5	2.6	3.5	50	120	120	25540000000000	820000000000	IT-PUB - 21	0.0027	17.38	0.28	17.9185	0.302173	17.9926	0.302401
IT-PUB - 22	rim of 23	disc.	22.908	1840	93	760000	138	2.34	0.19	0.0198	0.0027	0.002752	7.4e-05	0.23971	0.0525	0.0074	0.00064	0.00017	19.9	2.7	2.7	17.72	0.48	0.49	12.9	3.3	3.6	370	260	260	9000000000000	1300000000000	IT-PUB - 22	0.002752	17.72	0.49	18.4578	0.525046	18.5257	0.525172
IT-PUB - 23	rim of 22		35.156	1740	87	690000	125	2.12	0.12	0.0191	0.0017	0.002762	6.6e-05	-0.078697	0.051	0.0048	0.00069	0.00015	19.2	1.7	1.7	17.78	0.42	0.43	13.9	3	3.4	220	180	180	8050000000000	930000000000	IT-PUB - 23	0.002762	17.78	0.43	18.5408	0.466064	18.6131	0.466206
IT-PUB - 24	rim of 25		29.032	21900	1031	9210000	1660	1.116	0.043	0.01739	0.00069	0.002672	3.5e-05	0.56592	0.0469	0.0017	0.000859	4e-05	17.51	0.68	0.69	17.2	0.22	0.24	17.35	0.8	2.1	58	74	74	112800000000000	6800000000000	IT-PUB - 24	0.002672	17.2	0.24	17.4784	0.248502	17.5529	0.248785
IT-PUB - 25	rim of 24	disc.	33.115	10000	565	4220000	762	1.187	0.021	0.0206	0.0011	0.002639	3.7e-05	-0.020459	0.0566	0.0033	0.001015	6.5e-05	20.7	1.1	1.1	16.99	0.24	0.26	20.5	1.3	2.7	450	130	130	50400000000000	2400000000000	IT-PUB - 25	0.002639	16.99	0.26	17.4005	0.274886	17.4726	0.275149
IT-PUB - 26	rim		35.156	11720	546	4850000	877	1.662	0.029	0.01698	0.00065	0.002632	3.5e-05	0.074093	0.047	0.0018	0.00087	6.2e-05	17.1	0.65	0.65	16.94	0.23	0.25	17.6	1.2	2.3	59	78	78	56100000000000	3300000000000	IT-PUB - 26	0.002632	16.94	0.25	17.3312	0.263935	17.4084	0.26421
IT-PUB - 27	rim		23.135	13430	634	5310000	961	1.2726	0.0089	0.01747	0.00086	0.00266	3.1e-05	0.12995	0.0481	0.0022	0.000876	7.9e-05	17.58	0.86	0.86	17.13	0.2	0.23	17.7	1.6	2.6	89	99	99	63900000000000	3200000000000	IT-PUB - 27	0.00266	17.13	0.23	17.5034	0.243137	17.5704	0.24343
IT-PUB - 28	rim	old	25.63	16320	750	3250000	588	1.602	0.035	0.0361	0.0017	0.0057	7.2e-05	0.30793	0.0464	0.0021	0.00203	0.00013	36	1.6	1.6	36.64	0.46	0.51	41	2.7	5.3	39	91	91	80700000000000	4100000000000	IT-PUB - 28	0.0057	36.64	0.51	37.354	0.533604	37.4249	0.533633
IT-PUB - 29	rim of 30	disc.	36.728	7080	2540	1750000	316	1.569	0.044	0.323	0.062	0.00542	0.00055	0.98659	0.372	0.048	0.0105	0.002	269	48	48	34.8	3.6	3.6	216	40	47	3600	260	260	34300000000000	1100000000000	IT-PUB - 29	0.00542	34.8	3.6	35.7748	3.70437	35.8914	3.70438
IT-PUB - 30	core of 29		24.723	5150	226	2086000	378	1.473	0.077	0.017	0.0011	0.002741	5.9e-05	0.26058	0.0452	0.003	0.00093	0.0001	17.1	1.1	1.1	17.65	0.38	0.39	18.9	2	2.9	-10	120	120	25500000000000	1100000000000	IT-PUB - 30	0.002741	17.65	0.39	18.1972	0.412201	18.2647	0.412363
IT-PUB - 31	rim of 32		23.815	11120	519	4680000	849	2.002	0.032	0.01715	0.00082	0.002664	4.2e-05	0.13042	0.0467	0.0023	0.000871	9.1e-05	17.27	0.82	0.83	17.15	0.27	0.29	17.6	1.8	2.7	52	98	99	53600000000000	2600000000000	IT-PUB - 31	0.002664	17.15	0.29	17.5538	0.304337	17.6267	0.30457
IT-PUB - 32	core of 31		9.753	7970	349	3510000	638	2.298	0.074	0.0172	0.0015	0.002614	6.8e-05	0.24388	0.0463	0.0034	0.00097	0.00013	17.3	1.5	1.5	16.83	0.43	0.45	19.6	2.6	3.4	30	150	150	40200000000000	1600000000000	IT-PUB - 32	0.002614	16.83	0.45	17.2747	0.467744	17.3459	0.467902
IT-PUB - 33	rim		9.0726	4060	204	1810000	329	1.769	0.086	0.0193	0.0029	0.00274	5.1e-05	-0.060074	0.0509	0.0076	0.00094	0.00019	19.4	2.8	2.8	17.64	0.33	0.34	19	3.8	4.4	190	290	290	21000000000000	2200000000000	IT-PUB - 33	0.00274	17.64	0.34	18.2215	0.364224	18.2927	0.364408
IT-PUB - 34	rim		35.156	9300	436	3654000	663.7	1.763	0.046	0.0181	0.001	0.002717	3e-05	0.31585	0.0479	0.0026	0.000944	7.9e-05	18.2	1	1	17.49	0.19	0.22	19.1	1.6	2.7	100	110	110	43010000000000	780000000000	IT-PUB - 34	0.002717	17.49	0.22	17.9403	0.237718	18.0138	0.238005
IT-PUB - 35	rim of 37		22.001	8500	365	3540000	643	1.793	0.015	0.016	0.0013	0.002659	4.2e-05	0.14168	0.0443	0.0034	0.0009	0.00012	16.1	1.3	1.3	17.12	0.27	0.29	18.1	2.4	3.2	-70	140	140	40800000000000	2900000000000	IT-PUB - 35	0.002659	17.12	0.29	17.5698	0.306834	17.6403	0.307066
IT-PUB - 36	rim		35.156	21000	923	8170000	1490	2.35	0.18	0.01827	0.0005	0.002856	2.4e-05	0.2436	0.0462	0.0012	0.000877	5.5e-05	18.38	0.5	0.51	18.38	0.15	0.19	17.7	1.1	2.3	24	54	54	97200000000000	9200000000000	IT-PUB - 36	0.002856	18.38	0.19	18.7044	0.201024	18.7817	0.201331
IT-PUB - 37	rim of 35		34.929	4640	216	1810000	330	1.643	0.049	0.018	0.0015	0.002732	4.8e-05	0.14403	0.0468	0.0038	0.000966	9.4e-05	18.1	1.5	1.5	17.59	0.31	0.33	19.5	1.9	2.9	90	160	160	22300000000000	1700000000000	IT-PUB - 37	0.002732	17.59	0.33	18.1592	0.353521	18.2288	0.353712
IT-PUB - 38	inner part		35.156	3540	159	1409000	257	1.836	0.043	0.0166	0.0015	0.002708	5.4e-05	0.10572	0.0445	0.0041	0.00093	0.00012	16.7	1.5	1.5	17.43	0.35	0.36	18.8	2.4	3.2	-40	160	160	16600000000000	940000000000	IT-PUB - 38	0.002708	17.43	0.36	18.0463	0.386536	18.1218	0.386713
IT-PUB - 39	inner part		23.135	9960	436	4240000	776	3.22	0.04	0.0163	0.0011	0.002665	3.3e-05	-0.10661	0.0445	0.0033	0.00088	0.0001	16.4	1.1	1.1	17.16	0.21	0.24	17.7	2.1	2.9	-40	140	140	46400000000000	1700000000000	IT-PUB - 39	0.002665	17.16	0.24	17.5888	0.256096	17.6579	0.256373
IT-PUB - 40	rim		35.156	12420	559	5180000	948	1.434	0.077	0.01638	0.00076	0.002605	4.7e-05	0.45769	0.0462	0.002	0.000908	5.2e-05	16.49	0.76	0.76	16.77	0.3	0.32	18.3	1	2.3	28	86	86	60900000000000	2200000000000	IT-PUB - 40	0.002605	16.77	0.32	17.1436	0.333005	17.2171	0.333228
IT-PUB - 41	inner part		26.764	5470	256	2272000	416	1.431	0.04	0.01775	0.00092	0.002731	5.4e-05	0.20808	0.0478	0.0026	0.0008	0.0001	17.86	0.92	0.93	17.58	0.35	0.36	16.1	2.1	2.7	100	110	110	27970000000000	720000000000	IT-PUB - 41	0.002731	17.58	0.36	18.1086	0.38104	18.182	0.381217
IT-PUB - 42	inner part		22.681	5500	269	2230000	409	1.792	0.029	0.0178	0.0012	0.002657	4.8e-05	0.28409	0.05	0.0035	0.00097	0.00013	17.9	1.2	1.2	17.1	0.31	0.32	19.6	2.7	3.4	180	140	140	25890000000000	820000000000	IT-PUB - 42	0.002657	17.1	0.32	17.6275	0.341271	17.7053	0.34148
IT-PUB - 43	inner part		27.671	4680	233	1900000	348	2.273	0.046	0.0183	0.0012	0.002764	3.9e-05	0.32416	0.0474	0.0028	0.00104	0.00016	18.7	1.3	1.3	17.79	0.25	0.27	21	3.2	3.9	80	120	120	22200000000000	1600000000000	IT-PUB - 43	0.002764	17.79	0.27	18.3665	0.294697	18.442	0.294921
IT-PUB - 44	inner part	disc.	34.997	10880	567	4380000	804	1.3	0.11	0.0226	0.0033	0.002667	4.6e-05	0.70936	0.0575	0.0068	0.00105	0.0001	22.7	3.3	3.3	17.17	0.3	0.31	21.1	2.1	3.2	410	210	210	54200000000000	3100000000000	IT-PUB - 44	0.002667	17.17	0.31	17.5724	0.324254	17.6445	0.324472
IT-PUB - 45	rim		29.032	5790	263	2310000	425	2.339	0.028	0.0172	0.0018	0.002832	4.4e-05	0.0642	0.0441	0.0045	0.0009	0.00016	17.3	1.8	1.8	18.23	0.28	0.3	18.1	3.2	3.8	-50	180	180	27600000000000	1600000000000	IT-PUB - 45	0.002832	18.23	0.3	18.7806	0.32226	18.8532	0.322455
IT-PUB - 46	rim of 47		35.156	5640	261	2321000	426.5	1.613	0.087	0.01719	0.00085	0.00263	4.7e-05	-0.10199	0.0471	0.0025	0.000937	7.9e-05	17.3	0.85	0.85	16.93	0.3	0.32	18.9	1.6	2.7	70	100	100	27480000000000	530000000000	IT-PUB - 46	0.00263	16.93	0.32	17.4421	0.340435	17.5162	0.340649
IT-PUB - 47	rim of 46	disc.	35.071	9730	920	3540000	652	1.692	0.016	0.0383	0.0038	0.002928	4.8e-05	0.71302	0.0932	0.0083	0.00161	0.00015	38.1	3.7	3.7	18.85	0.31	0.33	32.5	3	4.7	1380	190	190	47500000000000	4300000000000	IT-PUB - 47	0.002928	18.85	0.33	19.3166	0.346937	19.3863	0.347106
IT-PUB - 48	inner part		22.455	12900	581	5650000	1040	1.255	0.032	0.0172	0.001	0.002608	4.5e-05	0.55048	0.0473	0.0026	0.000842	6.7e-05	17.3	1	1	16.79	0.29	0.31	17	1.4	2.3	80	110	110	66000000000000	11000000000000	IT-PUB - 48	0.002608	16.79	0.31	17.1506	0.322335	17.2235	0.322565
IT-PUB - 49	rim		14.97	6580	322	2695000	496	1.657	0.036	0.0195	0.0018	0.002864	5.6e-05	-0.065973	0.0497	0.0048	0.00087	0.00012	19.6	1.8	1.8	18.43	0.36	0.37	17.6	2.5	3.2	170	190	190	34200000000000	1100000000000	IT-PUB - 49	0.002864	18.43	0.37	18.9468	0.38991	19.0253	0.390067
IT-PUB - 50	inner part		15.197	3870	189	1680000	310	1.415	0.033	0.0183	0.0029	0.002722	5.7e-05	0.24884	0.0492	0.0076	0.00076	0.00013	18.4	2.9	2.9	17.52	0.37	0.38	15.3	2.6	3.1	130	290	290	20600000000000	1700000000000	IT-PUB - 50	0.002722	17.52	0.38	18.101	0.404267	18.1765	0.404435
IT-PUB - 51	inner part		35.156	9230	423	3830000	705	2.434	0.03	0.01696	0.00082	0.002665	4e-05	0.25293	0.0467	0.0024	0.000897	9.9e-05	17.07	0.82	0.83	17.16	0.26	0.28	18.1	2	2.9	60	100	100	43100000000000	2100000000000	IT-PUB - 51	0.002665	17.16	0.28	17.6014	0.296401	17.6705	0.29664
IT-PUB - 52	rim		34.929	11620	570	4600000	849	1.637	0.013	0.01894	0.00065	0.002755	2.6e-05	0.058019	0.0496	0.0017	0.000905	7e-05	19.05	0.65	0.66	17.74	0.16	0.2	18.3	1.4	2.5	191	76	76	57300000000000	3200000000000	IT-PUB - 52	0.002755	17.74	0.2	18.1459	0.215458	18.2137	0.215765
IT-PUB - 53	rim		35.156	11720	552	4740000	874	1.352	0.023	0.01783	0.0006	0.00273	2.9e-05	0.19302	0.0484	0.0018	0.000891	5.5e-05	17.95	0.59	0.6	17.57	0.19	0.22	18	1.1	2.3	120	74	75	58900000000000	2900000000000	IT-PUB - 53	0.00273	17.57	0.22	17.9672	0.234508	18.0445	0.234796
IT-KKB1 - 1	rim of 2	disc.	33.795	7020	1920	1900000	350	2.3	0.18	5.8	2.7	0.054	0.024	0.98889	0.37	0.1	0.154	0.072	1070	400	400	320	140	140	2700	1200	1200	2510	630	630	34400000000000	3400000000000	IT-KKB1 - 1	0.054	320	140	328.955	143.925	348.338	143.925
IT-KKB1 - 2	inner part of 1	disc.	34.703	6600	920	2000000	369	3.22	0.61	1.64	0.8	0.0205	0.0088	0.96374	0.268	0.077	0.183	0.098	600	250	250	128	55	55	2400	1200	1200	2100	600	600	30900000000000	4900000000000	IT-KKB1 - 2	0.0205	128	55	131.72	56.6018	134.649	56.6018
IT-KKB1 - 3	rim		35.156	5310	235	2260000	417	2	0.016	0.0159	0.0012	0.002597	4e-05	-0.028038	0.0446	0.0034	0.000866	9e-05	16	1.2	1.2	16.72	0.25	0.27	17.5	1.8	2.7	-40	130	130	25200000000000	1200000000000	IT-KKB1 - 3	0.002597	16.72	0.27	17.2403	0.291468	17.3122	0.291724
IT-KKB1 - 4	rim		34.929	9630	457	3927000	726	2.572	0.03	0.01767	0.00099	0.002692	2.7e-05	0.014152	0.0469	0.0024	0.000982	8.7e-05	17.78	0.98	0.99	17.33	0.18	0.2	19.8	1.8	2.8	70	110	110	45220000000000	710000000000	IT-KKB1 - 4	0.002692	17.33	0.2	17.7675	0.217535	17.8403	0.217855
IT-KKB1 - 5	rim		34.929	5670	273	2420000	448	1.7	0.021	0.0176	0.0011	0.002585	4.2e-05	0.36562	0.0492	0.0028	0.00089	0.00011	17.7	1.1	1.1	16.64	0.27	0.29	18	2.3	3.1	160	110	110	27500000000000	1600000000000	IT-KKB1 - 5	0.002585	16.64	0.29	17.1432	0.310198	17.218	0.310441
IT-KKB1 - 6	rim of 7	disc.	35.156	13470	886	5420000	1003	1.412	0.011	0.0242	0.0024	0.00276	8.9e-05	0.68111	0.064	0.0052	0.00109	0.0001	24.3	2.4	2.4	17.77	0.57	0.58	22.1	2	3.2	690	180	180	66800000000000	2800000000000	IT-KKB1 - 6	0.00276	17.77	0.58	18.1495	0.595772	18.2195	0.595883
IT-KKB1 - 7	rim of 6	disc.	34.703	4480	247	1796000	332.6	1.726	0.024	0.0206	0.0015	0.002714	5.1e-05	0.13956	0.054	0.0038	0.00104	8.6e-05	20.7	1.5	1.5	17.47	0.33	0.35	21	1.7	2.9	400	150	150	21650000000000	840000000000	IT-KKB1 - 7	0.002714	17.47	0.35	18.0405	0.37362	18.1146	0.373803
IT-KKB1 - 8	rim		35.156	7020	315	3010000	558	1.594	0.086	0.0166	0.00098	0.002633	3.9e-05	-0.090876	0.0463	0.0029	0.000876	9.8e-05	16.71	0.98	0.98	16.95	0.25	0.27	17.7	2	2.8	40	120	120	36000000000000	5200000000000	IT-KKB1 - 8	0.002633	16.95	0.27	17.4166	0.288021	17.49	0.288273
IT-KKB1 - 9	rim		25.857	8430	384	3490000	647.1	1.909	0.054	0.0168	0.0012	0.002678	3.6e-05	-0.076527	0.045	0.0031	0.000902	9.5e-05	16.9	1.2	1.2	17.24	0.23	0.26	18.2	1.9	2.8	10	130	130	41020000000000	700000000000	IT-KKB1 - 9	0.002678	17.24	0.26	17.692	0.277158	17.7648	0.277411
IT-KKB1 - 10	rim of 11		20.64	41200	1879	17900000	3320	0.642	0.013	0.01653	0.00048	0.002623	2.8e-05	0.31235	0.0458	0.0012	0.000855	2.2e-05	16.65	0.48	0.49	16.89	0.18	0.2	17.27	0.45	2	4	55	55	250800000000000	5700000000000	IT-KKB1 - 10	0.002623	16.89	0.2	17.0319	0.203773	17.1015	0.204132
IT-KKB1 - 11	core of 10		35.156	11000	523	4540000	842	1.499	0.032	0.01749	0.00085	0.002685	3.6e-05	0.29605	0.0474	0.0022	0.000926	7.4e-05	17.6	0.85	0.85	17.29	0.23	0.25	18.7	1.5	2.6	81	91	91	54200000000000	2000000000000	IT-KKB1 - 11	0.002685	17.29	0.25	17.6952	0.264594	17.7629	0.264858
IT-KKB1 - 12	rim		12.702	8530	390	3810000	708	1.784	0.035	0.0168	0.0014	0.00264	7.3e-05	0.20078	0.0463	0.0037	0.000844	9e-05	16.9	1.4	1.4	17	0.47	0.48	17.1	1.8	2.6	40	150	150	44700000000000	2700000000000	IT-KKB1 - 12	0.00264	17	0.48	17.4311	0.49735	17.4995	0.497495
IT-KKB1 - 13	rim of 14		35.156	6250	278	2680000	498	1.921	0.067	0.0168	0.0011	0.002643	3.8e-05	-0.21393	0.0479	0.0036	0.00101	0.00014	17	1.1	1.1	17.02	0.24	0.26	20.4	2.8	3.6	90	140	140	31100000000000	3700000000000	IT-KKB1 - 13	0.002643	17.02	0.26	17.5135	0.279773	17.5811	0.280031
IT-KKB1 - 14	rim of 13	disc.	33.115	9440	646	3710000	690	1.926	0.064	0.0283	0.0026	0.002821	5.6e-05	-0.094437	0.0727	0.0062	0.00145	0.00016	28.3	2.5	2.5	18.16	0.36	0.38	29.2	3.3	4.7	960	180	180	46000000000000	4100000000000	IT-KKB1 - 14	0.002821	18.16	0.38	18.6153	0.396799	18.6873	0.396958
IT-KKB1 - 15	rim		29.032	23800	1109	9570000	1780	1.182	0.015	0.0177	0.00058	0.00268	3e-05	-0.038311	0.0475	0.0014	0.000899	5.1e-05	17.81	0.58	0.59	17.25	0.19	0.22	18.2	1	2.3	81	61	62	121000000000000	11000000000000	IT-KKB1 - 15	0.00268	17.25	0.22	17.5174	0.228108	17.5933	0.228415
IT-KKB1 - 16	inner part		25.403	6940	303	2690000	502	1.487	0.018	0.01728	0.00095	0.002825	4e-05	0.31985	0.0445	0.0023	0.00101	0.00011	17.4	0.95	0.95	18.19	0.26	0.28	20.5	2.1	3.1	-40	97	97	34500000000000	3200000000000	IT-KKB1 - 16	0.002825	18.19	0.28	18.6985	0.299923	18.766	0.300134
IT-KKB1 - 17	rim of 18		35.156	7650	365	3110000	580	1.857	0.035	0.0177	0.001	0.002701	3.9e-05	0.41803	0.0474	0.0026	0.00088	0.00011	17.8	1	1	17.39	0.25	0.27	17.7	2.2	3	80	110	110	37300000000000	2100000000000	IT-KKB1 - 17	0.002701	17.39	0.27	17.8625	0.288196	17.9331	0.288436
IT-KKB1 - 18	rim of 17		9.0726	13330	645	5110000	953	1.574	0.076	0.01782	0.00077	0.002687	8.2e-05	0.18851	0.048	0.002	0.00108	0.00013	17.93	0.76	0.77	17.3	0.52	0.53	21.8	2.6	3.6	100	93	93	62100000000000	4600000000000	IT-KKB1 - 18	0.002687	17.3	0.53	17.682	0.545439	17.7527	0.545566
IT-KKB1 - 19	rim		18.599	6410	307	2695000	502.5	1.485	0.016	0.0171	0.0012	0.002648	5e-05	0.4359	0.0475	0.0032	0.00088	0.00012	17.2	1.2	1.2	17.04	0.32	0.34	17.9	2.4	3.2	80	130	130	32810000000000	710000000000	IT-KKB1 - 19	0.002648	17.04	0.34	17.5249	0.358802	17.605	0.359002
IT-KKB1 - 20	rim of 21		34.929	15600	725	6560000	1225	1.075	0.027	0.01677	0.00066	0.002582	3.4e-05	0.23673	0.0469	0.0017	0.000856	5.1e-05	16.88	0.65	0.66	16.63	0.22	0.24	17.3	1	2.2	56	73	73	82200000000000	5600000000000	IT-KKB1 - 20	0.002582	16.63	0.24	16.951	0.25052	17.0166	0.250822
IT-KKB1 - 21	rim of 20		34.929	6120	269	2420000	451	1.727	0.041	0.01696	0.00099	0.002729	4.3e-05	0.083279	0.0449	0.0027	0.000893	9.9e-05	17.07	0.99	1	17.57	0.27	0.29	18	2	2.9	-20	110	110	29400000000000	1700000000000	IT-KKB1 - 21	0.002729	17.57	0.29	18.0894	0.310746	18.1599	0.310964
IT-KKB1 - 22	core		25.63	4660	214	1930000	360	1.84	0.13	0.0167	0.0015	0.002602	5.5e-05	0.42105	0.047	0.0035	0.00093	0.00011	16.8	1.5	1.5	16.75	0.35	0.37	18.8	2.3	3.1	90	150	150	22200000000000	2700000000000	IT-KKB1 - 22	0.002602	16.75	0.37	17.2928	0.392458	17.3668	0.392647
IT-KKB1 - 23	rim of 24		34.929	11500	539	4790000	890	2.05	0.18	0.01736	0.00082	0.002678	3.9e-05	0.0093193	0.0474	0.0024	0.00092	8.1e-05	17.48	0.82	0.82	17.24	0.25	0.27	18.6	1.6	2.7	83	98	98	55500000000000	7300000000000	IT-KKB1 - 23	0.002678	17.24	0.27	17.64	0.284173	17.7128	0.28442
IT-KKB1 - 24	rim of 23		34.929	9540	459	4030000	753	1.766	0.015	0.0172	0.00086	0.002618	2.9e-05	0.095452	0.0477	0.0024	0.000907	7e-05	17.31	0.86	0.87	16.86	0.19	0.21	18.3	1.4	2.5	90	100	100	46800000000000	3000000000000	IT-KKB1 - 24	0.002618	16.86	0.21	17.2798	0.226243	17.3467	0.226568
IT-KKB1 - 25	inner part		19.733	7470	357	2990000	560	1.598	0.014	0.01789	0.00087	0.002679	4.8e-05	0.049278	0.049	0.0028	0.000865	9.8e-05	18	0.87	0.88	17.25	0.31	0.33	17.5	2	2.8	140	120	120	36300000000000	1800000000000	IT-KKB1 - 25	0.002679	17.25	0.33	17.7234	0.348027	17.7925	0.348229
IT-KKB1 - 26	rim		35.156	8870	415	3770000	707	0.598	0.026	0.01684	0.00081	0.002581	4e-05	0.14929	0.0481	0.0023	0.000829	4.5e-05	16.95	0.81	0.81	16.61	0.25	0.27	16.75	0.92	2.1	108	96	97	53500000000000	2400000000000	IT-KKB1 - 26	0.002581	16.61	0.27	17.0014	0.283931	17.0808	0.284197
IT-KKB1 - 27	inner part		21.094	12830	593	5000000	937	2.228	0.06	0.018	0.0012	0.00269	3.6e-05	0.12642	0.0478	0.0032	0.00102	0.00011	18.1	1.2	1.2	17.32	0.23	0.25	20.7	2.2	3.2	100	130	130	58800000000000	2900000000000	IT-KKB1 - 27	0.00269	17.32	0.25	17.7119	0.263862	17.7818	0.264126
IT-KKB1 - 28	rim		24.95	13410	615	5700000	1068	1.067	0.019	0.01708	0.00086	0.002642	3.5e-05	-0.081966	0.0464	0.0024	0.000874	6.6e-05	17.2	0.85	0.86	17.01	0.22	0.25	17.7	1.3	2.4	40	100	100	72800000000000	4900000000000	IT-KKB1 - 28	0.002642	17.01	0.25	17.3588	0.261728	17.4302	0.262004
IT-KKB1 - 29	inner part	disc.	33.795	9100	478	3750000	704	2.226	0.025	0.0193	0.001	0.002656	3.6e-05	0.001758	0.0527	0.0031	0.001131	8.8e-05	19.6	1.1	1.1	17.1	0.23	0.25	22.9	1.8	3.1	330	120	120	44100000000000	2800000000000	IT-KKB1 - 29	0.002656	17.1	0.25	17.5359	0.266393	17.6073	0.266661
IT-KKB1 - 30	rim		27.898	13950	623	5760000	1085	1.07	0.022	0.01707	0.00072	0.002686	3.1e-05	0.17139	0.0457	0.0019	0.000851	4.7e-05	17.18	0.72	0.72	17.29	0.2	0.23	17.19	0.94	2.2	7	79	80	76000000000000	3000000000000	IT-KKB1 - 30	0.002686	17.29	0.23	17.6372	0.241735	17.7116	0.242023
IT-KKB1 - 31	rim of 32		35.156	20670	962	8830000	1660	1.55	0.042	0.01711	0.00057	0.002608	2.8e-05	0.30463	0.0475	0.0014	0.000869	4.6e-05	17.22	0.57	0.58	16.79	0.18	0.21	17.56	0.93	2.2	71	62	62	104800000000000	6000000000000	IT-KKB1 - 31	0.002608	16.79	0.21	17.0739	0.218958	17.1469	0.219296
IT-KKB1 - 32	rim of 31		35.156	9190	397	3788000	715	1.454	0.017	0.01631	0.00092	0.002656	3e-05	0.12246	0.0447	0.0025	0.000909	4.8e-05	16.43	0.92	0.92	17.1	0.19	0.22	18.36	0.96	2.3	-30	100	100	46500000000000	1100000000000	IT-KKB1 - 32	0.002656	17.1	0.22	17.5269	0.236377	17.5982	0.236679
IT-KKB1 - 33	rim of 34		36.29	7050	356	3020000	571	1.676	0.042	0.018	0.00089	0.002569	3.3e-05	0.049493	0.0506	0.0025	0.000928	8.3e-05	18.11	0.88	0.89	16.54	0.21	0.23	18.7	1.7	2.7	230	100	100	35300000000000	1800000000000	IT-KKB1 - 33	0.002569	16.54	0.23	16.9986	0.248307	17.0705	0.248614
IT-KKB1 - 34	rim of 33		12.021	7100	326	3195000	604	1.686	0.027	0.0169	0.0011	0.002668	6.4e-05	0.36332	0.0478	0.0028	0.00074	0.00016	17	1.1	1.1	17.17	0.41	0.42	14.9	3.3	3.7	60	140	140	38000000000000	1400000000000	IT-KKB1 - 34	0.002668	17.17	0.42	17.6333	0.438126	17.7119	0.438288
IT-KKB1 - 35	rim of 36		34.929	5530	252	2260000	427	1.804	0.02	0.0172	0.0011	0.002722	3.4e-05	-0.10335	0.0454	0.003	0.00086	0.0001	17.3	1.1	1.1	17.52	0.22	0.24	17.5	2	2.8	20	120	120	27600000000000	2100000000000	IT-KKB1 - 35	0.002722	17.52	0.24	18.0491	0.262352	18.1247	0.262611
IT-KKB1 - 36	core of 35, 37		34.929	3570	179	1452000	275	1.396	0.03	0.0182	0.0013	0.002662	4.8e-05	0.059551	0.0503	0.0038	0.00094	0.0001	18.3	1.3	1.3	17.13	0.31	0.32	19.1	2.1	3	190	150	150	18000000000000	880000000000	IT-KKB1 - 36	0.002662	17.13	0.32	17.7216	0.345317	17.8015	0.345523
IT-KKB1 - 37	rim of 36		22.228	4930	218	2140000	405	2.051	0.033	0.0164	0.0014	0.00264	4.6e-05	-0.21242	0.0455	0.0041	0.00084	0.00012	16.5	1.4	1.4	16.99	0.3	0.32	17.1	2.5	3.2	0	160	160	25000000000000	1500000000000	IT-KKB1 - 37	0.00264	16.99	0.32	17.5201	0.341493	17.5986	0.341705
IT-KKB1 - 38	rim of 39		34.929	14630	677	6050000	1146	1.341	0.028	0.01727	0.00057	0.002629	3.1e-05	0.048572	0.0477	0.0016	0.000792	5.3e-05	17.38	0.57	0.58	16.92	0.2	0.22	16	1.1	2.1	65	68	68	74200000000000	4100000000000	IT-KKB1 - 38	0.002629	16.92	0.22	17.2638	0.231743	17.3418	0.232058
IT-KKB1 - 39	inner part of 38	disc.	35.086	2540	990	601000	114	2.429	0.028	0.264	0.073	0.00491	0.00062	0.98406	0.349	0.061	0.0147	0.0039	239	59	59	31.6	4	4	294	77	84	3380	360	360	12300000000000	1200000000000	IT-KKB1 - 39	0.00491	31.6	4	32.8142	4.15861	32.8573	4.15861
IT-KKB1 - 40	inner part	disc.	35.055	16300	1120	6880000	1310	0.908	0.035	0.0246	0.0018	0.00261	3.2e-05	0.42302	0.0682	0.0047	0.000983	5.6e-05	24.7	1.8	1.8	16.8	0.21	0.23	19.9	1.1	2.5	820	150	150	92000000000000	10000000000000	IT-KKB1 - 40	0.00261	16.8	0.23	17.1056	0.239815	17.1815	0.240124
IT-KKB1 - 41	rim of 42		35.156	11610	534	4885000	927	1.12	0.032	0.01636	0.0007	0.002585	3.3e-05	-0.0069599	0.0465	0.0021	0.000859	5e-05	16.47	0.7	0.71	16.65	0.21	0.24	17.4	1	2.2	44	89	89	61000000000000	1100000000000	IT-KKB1 - 41	0.002585	16.65	0.24	17.0206	0.253006	17.0854	0.253303
IT-KKB1 - 42	core of 41, 43		35.156	6230	293	2540000	483	1.85	0.13	0.01692	0.00085	0.002693	3.5e-05	0.23851	0.0459	0.0023	0.000812	8.9e-05	17.03	0.85	0.85	17.34	0.22	0.25	16.4	1.8	2.6	16	94	94	30400000000000	2200000000000	IT-KKB1 - 42	0.002693	17.34	0.25	17.8468	0.270679	17.9158	0.270935
IT-KKB1 - 43	rim of 42		18.145	10760	479	4760000	905	1.537	0.019	0.01637	0.00097	0.00258	3.6e-05	0.13179	0.0451	0.0025	0.000854	7.7e-05	16.48	0.97	0.98	16.61	0.23	0.25	17.3	1.6	2.5	-20	110	110	57100000000000	1900000000000	IT-KKB1 - 43	0.00258	16.61	0.25	16.9906	0.263469	17.0635	0.263756
IT-KKB1 - 44	rim of 45		23.589	23810	1082	10300000	1958	0.84	0.013	0.01657	0.00056	0.002612	2.9e-05	-0.0053035	0.0463	0.0017	0.000834	4.2e-05	16.69	0.55	0.56	16.82	0.19	0.21	16.84	0.86	2.1	34	74	75	138000000000000	6300000000000	IT-KKB1 - 44	0.002612	16.82	0.21	17.059	0.217039	17.1277	0.217379
IT-KKB1 - 45	rim of 44		35.156	18970	845	8090000	1540	1.223	0.01	0.01666	0.00072	0.002633	2.9e-05	0.16147	0.0457	0.002	0.000875	4e-05	16.78	0.72	0.72	16.95	0.19	0.21	17.68	0.82	2.1	24	86	86	99200000000000	5500000000000	IT-KKB1 - 45	0.002633	16.95	0.21	17.2458	0.219484	17.3195	0.219815
IT-KKB1 - 46	rim	disc.	32.661	14690	746	6090000	1159	1.119	0.013	0.01971	0.00079	0.002688	2.8e-05	-0.039297	0.0531	0.0022	0.000925	4.1e-05	19.81	0.79	0.8	17.31	0.18	0.21	18.68	0.83	2.3	315	92	92	79500000000000	6300000000000	IT-KKB1 - 46	0.002688	17.31	0.21	17.6499	0.221602	17.717	0.221917
IT-KKB1 - 47	rim		17.238	14270	647	5480000	1043	0.945	0.04	0.01707	0.00077	0.002727	4.2e-05	0.1697	0.0458	0.002	0.000867	6.5e-05	17.19	0.77	0.78	17.56	0.27	0.29	17.5	1.3	2.4	12	86	86	73900000000000	1900000000000	IT-KKB1 - 47	0.002727	17.56	0.29	17.9175	0.301904	17.9853	0.302129
IT-KKB1 - 48	rim	old	35.156	31100	1440	11150000	2120	1.291	0.012	0.01967	0.00051	0.00308	2.8e-05	0.28869	0.0462	0.0011	0.001063	4.2e-05	19.78	0.51	0.52	19.83	0.18	0.21	21.48	0.84	2.6	24	50	50	159800000000000	9900000000000	IT-KKB1 - 48	0.00308	19.83	0.21	20.0834	0.217438	20.1503	0.217682
IT-KKB1 - 49	inner part		36.063	5300	233	2175000	414.7	1.366	0.026	0.01664	0.00089	0.002683	4.3e-05	0.16153	0.0453	0.0025	0.00082	9.3e-05	16.76	0.89	0.89	17.27	0.28	0.3	16.6	1.9	2.6	-10	100	100	27510000000000	610000000000	IT-KKB1 - 49	0.002683	17.27	0.3	17.7921	0.320967	17.867	0.321185
IT-KKB1 - 50	inner part		33.795	13840	639	5780000	1103	1.895	0.076	0.01698	0.00071	0.002642	3e-05	0.22183	0.0459	0.0017	0.000846	6.1e-05	17.09	0.71	0.71	17.01	0.19	0.22	17.1	1.2	2.3	18	73	73	68900000000000	3500000000000	IT-KKB1 - 50	0.002642	17.01	0.22	17.3681	0.232474	17.4395	0.232784
LR_11_MSZ-1 - 1	rim	disc.	35.61	24000	1750	9900000	1890	1.442	0.019	0.027	0.0011	0.002657	4.4e-05	0.2923	0.074	0.0032	0.00115	5e-05	27	1.1	1.1	17.11	0.28	0.3	23.2	1	2.8	1026	87	87	125000000000000	18000000000000	LR_11_MSC-1 - 1	0.002657	17.11	0.3	17.3697	0.307843	17.4377	0.308075
LR_11_MSZ-1 - 2	rim	disc.	35.156	4400	363	1695000	324	1.747	0.023	0.0329	0.0041	0.002858	5.5e-05	0.48488	0.0819	0.009	0.00158	0.00018	32.8	4	4	18.4	0.35	0.37	31.9	3.7	5.2	1230	220	220	22000000000000	1100000000000	LR_11_MSC-1 - 2	0.002858	18.4	0.37	18.9979	0.394691	19.0675	0.394848
LR_11_MSZ-1 - 3	inner part		17.011	11060	502	4795000	916	2.3	0.034	0.0172	0.001	0.002664	5e-05	0.019295	0.046	0.0027	0.000817	8.3e-05	17.3	1	1	17.15	0.32	0.34	16.5	1.7	2.5	30	110	110	57090000000000	610000000000	LR_11_MSC-1 - 3	0.002664	17.15	0.34	17.5431	0.353898	17.6159	0.354099
LR_11_MSZ-1 - 4	rim		35.156	17310	807	7330000	1401	1.493	0.017	0.01715	0.00061	0.002619	2.6e-05	-0.065422	0.0475	0.0017	0.000907	4.1e-05	17.27	0.61	0.61	16.86	0.17	0.19	18.31	0.82	2.2	79	72	73	89700000000000	6200000000000	LR_11_MSC-1 - 4	0.002619	16.86	0.19	17.1709	0.200498	17.2446	0.200864
LR_11_MSZ-1 - 5	inner part		35.156	2420	105	1002000	192	1.8	0.022	0.0159	0.0018	0.002592	6.4e-05	0.040215	0.0456	0.0052	0.00101	0.00016	16	1.8	1.8	16.69	0.41	0.42	20.3	3.2	3.9	40	200	200	11890000000000	740000000000	LR_11_MSC-1 - 5	0.002592	16.69	0.42	17.3371	0.449393	17.4066	0.44956
LR_11_MSZ-1 - 6	rim	disc.	30.166	3750	1200	1010000	193	1.903	0.016	0.222	0.063	0.00457	0.00055	0.98428	0.292	0.062	0.0093	0.0026	190	50	50	29.4	3.5	3.5	187	52	56	2990	440	440	18810000000000	680000000000	LR_11_MSC-1 - 6	0.00457	29.4	3.5	30.4021	3.62312	30.4653	3.62313
LR_11_MSZ-1 - 7	inner part		17.691	6530	311	2630000	505	1.161	0.059	0.0173	0.0011	0.002596	4.5e-05	0.25058	0.0488	0.0031	0.00088	0.00011	17.5	1.1	1.1	16.71	0.29	0.31	17.8	2.1	2.9	140	140	140	33100000000000	2800000000000	LR_11_MSC-1 - 7	0.002596	16.71	0.31	17.1841	0.328343	17.2597	0.32857
LR_11_MSZ-1 - 8	rim		9.5262	3540	158	1575000	302	1.957	0.042	0.0166	0.0029	0.002647	6.9e-05	0.2938	0.0451	0.0075	0.00081	0.00022	16.7	2.9	2.9	17.04	0.44	0.45	16.3	4.4	4.8	-20	300	300	19100000000000	1100000000000	LR_11_MSC-1 - 8	0.002647	17.04	0.45	17.6182	0.475065	17.6915	0.475216
LR_11_MSZ-1 - 9	inner part	disc.	35.156	5730	743	2272000	436	1.006	0.07	0.0517	0.0064	0.002791	6e-05	0.62244	0.131	0.015	0.00143	0.00016	50.9	6.2	6.2	17.96	0.39	0.4	28.8	3.3	4.6	1950	250	250	31480000000000	810000000000	LR_11_MSC-1 - 9	0.002791	17.96	0.4	18.4786	0.420436	18.5579	0.42059
LR_11_MSZ-1 - 10	inner part		10.66	2800	138	1213000	233	2.041	0.033	0.0182	0.002	0.00271	8.3e-05	0.24807	0.0472	0.0041	0.00096	0.00023	18.3	2	2	17.45	0.53	0.54	19.3	4.7	5.2	190	230	230	15030000000000	740000000000	LR_11_MSC-1 - 10	0.00271	17.45	0.54	18.0847	0.5695	18.1528	0.56962
LR_11_MSZ-1 - 11	inner part	disc.	6.3508	2420	125	791000	151.9	1.6	0.1	0.0222	0.0041	0.00309	0.00017	0.52575	0.0519	0.0087	0.00108	0.00044	22.2	4	4	19.9	1.1	1.1	21.8	8.9	9.2	260	350	350	11360000000000	710000000000	LR_11_MSC-1 - 11	0.00309	19.9	1.1	20.6808	1.15054	20.7408	1.15058
LR_11_MSZ-1 - 12	inner part	disc.	34.476	7590	454	3110000	597	1.269	0.087	0.022	0.0016	0.002665	4.7e-05	0.12121	0.0607	0.0044	0.001003	8.7e-05	22.1	1.6	1.6	17.16	0.3	0.32	20.3	1.7	2.9	550	150	150	40100000000000	3000000000000	LR_11_MSC-1 - 12	0.002665	17.16	0.32	17.6138	0.336981	17.6829	0.337192
LR_11_MSZ-1 - 13	inner part	disc.	35.61	5610	297	2480000	476	1.275	0.037	0.0195	0.0014	0.00255	4.3e-05	0.3978	0.0553	0.0038	0.00092	0.00011	19.6	1.4	1.4	16.42	0.28	0.29	18.5	2.2	3	410	150	150	29900000000000	1800000000000	LR_11_MSC-1 - 13	0.00255	16.42	0.29	16.9027	0.309063	16.9723	0.309314
LR_11_MSZ-1 - 14	inner part		14.743	3420	164	1486000	286	2.148	0.067	0.0178	0.0016	0.002658	6.3e-05	0.19075	0.0485	0.0043	0.00107	0.00022	18	1.6	1.6	17.11	0.4	0.42	21.7	4.4	5	120	180	180	17900000000000	1000000000000	LR_11_MSC-1 - 14	0.002658	17.11	0.42	17.7018	0.445504	17.7759	0.445664
LR_11_MSZ-1 - 15	inner part		34.929	2520	110	980000	189	2.128	0.049	0.0167	0.0014	0.002675	6.9e-05	-0.13306	0.0456	0.0052	0.00099	0.00016	16.9	1.4	1.4	17.22	0.45	0.46	20.1	3.3	4	60	180	180	12700000000000	1400000000000	LR_11_MSC-1 - 15	0.002675	17.22	0.46	17.876	0.489846	17.9492	0.48999
LR_11_MSZ-1 - 16	rim		17.465	8600	395	3854000	742	1.252	0.026	0.0164	0.001	0.002593	6.1e-05	-0.017939	0.0455	0.0028	0.000862	7.7e-05	16.6	1	1	16.69	0.39	0.4	17.4	1.6	2.5	0	120	120	48100000000000	1300000000000	LR_11_MSC-1 - 16	0.002593	16.69	0.4	17.101	0.415501	17.1774	0.415681
LR_11_MSZ-1 - 17	inner part	disc.	34.929	16200	3900	2340000	450	1.445	0.078	0.52	0.17	0.009	0.0023	0.45195	0.396	0.058	0.016	0.0055	365	96	96	58	15	15	320	110	110	3780	250	250	86000000000000	31000000000000	LR_11_MSC-1 - 17	0.009	58	15	59.0938	15.284	58.915	15.284
LR_11_MSZ-1 - 18	rim		4.7631	4090	173	1858000	358	1.928	0.042	0.0159	0.0053	0.0027	0.00017	0.2438	0.043	0.014	0.00081	0.00023	16	5.3	5.3	17.4	1.1	1.1	16.5	4.6	5	-80	570	570	22800000000000	1300000000000	LR_11_MSC-1 - 18	0.0027	17.4	1.1	17.9591	1.13913	18.0126	1.13919
LR_11_MSZ-1 - 19	inner part		11.341	5200	270	2160000	417	1.351	0.029	0.0181	0.0028	0.002656	7.6e-05	-0.13948	0.0498	0.0081	0.00076	0.00013	18.2	2.8	2.8	17.1	0.49	0.5	15.4	2.6	3.1	140	270	270	29800000000000	6500000000000	LR_11_MSC-1 - 19	0.002656	17.1	0.5	17.6032	0.521432	17.6744	0.521569
LR_11_MSZ-1 - 20	rim		29.032	3650	174	1450000	281	2.084	0.041	0.0185	0.0018	0.002703	4.6e-05	-0.04233	0.0499	0.005	0.00102	0.00017	18.6	1.8	1.8	17.4	0.29	0.31	20.5	3.4	4.1	170	190	190	17800000000000	1700000000000	LR_11_MSC-1 - 20	0.002703	17.4	0.31	18.0029	0.336002	18.0762	0.336207
LR_11_MSZ-1 - 21	inner part		35.156	3890	185	1630000	315	1.577	0.021	0.0172	0.0012	0.002587	5.6e-05	0.018498	0.0485	0.0037	0.000776	9.8e-05	17.3	1.2	1.2	16.65	0.36	0.38	15.7	2	2.6	120	150	150	20200000000000	1600000000000	LR_11_MSC-1 - 21	0.002587	16.65	0.38	17.2055	0.403353	17.2832	0.403539
LR_11_MSZ-1 - 22	inner part		27.218	4350	207	1810000	350	1.964	0.064	0.0174	0.0014	0.002644	6e-05	0.26563	0.0475	0.0041	0.00084	0.00011	17.5	1.4	1.4	17.02	0.39	0.4	17	2.2	2.9	80	160	160	21800000000000	2400000000000	LR_11_MSC-1 - 22	0.002644	17.02	0.4	17.5746	0.423161	17.6487	0.423332
LR_11_MSZ-1 - 23	rim		34.929	27600	1295	11580000	2240	0.578	0.015	0.01711	0.00054	0.002658	2.4e-05	0.14576	0.0466	0.0014	0.000901	3.5e-05	17.22	0.54	0.55	17.11	0.15	0.18	18.2	0.71	2.2	34	62	62	176000000000000	15000000000000	LR_11_MSC-1 - 23	0.002658	17.11	0.18	17.3126	0.185816	17.3871	0.186199
LR_11_MSZ-1 - 24	rim		35.156	9660	440	3900000	755	1.536	0.055	0.01675	0.0008	0.002719	2.7e-05	-0.044763	0.0453	0.0023	0.000946	7.5e-05	16.86	0.8	0.8	17.51	0.18	0.21	19.1	1.5	2.6	-23	96	96	50100000000000	2600000000000	LR_11_MSC-1 - 24	0.002719	17.51	0.21	17.9341	0.226344	18.0003	0.226644
LR_11_MSZ-1 - 25A	inner part	disc.	17.465	1770	93	713000	138.7	2.186	0.037	0.0207	0.003	0.00281	0.00012	0.28212	0.0569	0.0084	0.00094	0.00026	20.8	2.9	2.9	18.11	0.79	0.8	19.1	5.3	5.8	440	290	290	9310000000000	770000000000	LR_11_MSC-1 - 25	0.00281	18.11	0.8	18.8577	0.842319	18.9077	0.842395
20160409p21
Plesovice - 9			20.523	266800	14190	5600000	1074	6.96	0.11	0.4037	0.0058	0.0549	0.00057	0.54794	0.05386	0.00068	0.01929	0.00088	344.3	4.1	5.2	344.6	3.5	4.1	386	18	47	370	30	30	1298000000000000	51000000000000	Plesovice - 9	0.0549	344.6	4.1	342.809	4.12185	342.861	4.12185
Plesovice - 10			23.901	113000	5810	2330000	452	10.99	0.13	0.3917	0.0068	0.05408	0.00042	0.34618	0.05259	0.00086	0.01741	0.00082	335.5	4.9	5.8	339.5	2.6	3.4	349	16	42	308	37	37	529000000000000	30000000000000	Plesovice - 10	0.05408	339.5	3.4	339.699	3.42523	339.785	3.42523
Plesovice - 11			32.399	231400	12240	4640000	908	5.718	0.037	0.4033	0.0043	0.05488	0.00043	0.47138	0.05345	0.00059	0.01801	0.00068	344	3.2	4.5	344.4	2.7	3.4	361	13	43	346	25	25	1109000000000000	66000000000000	Plesovice - 11	0.05488	344.4	3.4	342.958	3.42887	343.077	3.42887
Plesovice - 12			14.464	117000	6170	2597000	514	11.08	0.18	0.3916	0.0084	0.05345	0.00037	0.21065	0.0534	0.0011	0.0186	0.0017	335.4	6.2	6.9	335.7	2.3	3.1	372	34	54	342	47	47	593000000000000	22000000000000	Plesovice - 12	0.05345	335.7	3.1	335.648	3.12499	335.687	3.12499
Plesovice - 13			34.311	42900	2265	888000	177.4	10.65	0.18	0.3913	0.0091	0.05365	0.00036	0.54371	0.0534	0.0011	0.0157	0.0015	335.1	6.6	7.3	336.9	2.2	3.1	315	31	47	339	47	47	206000000000000	11000000000000	Plesovice - 13	0.05365	336.9	3.1	339.169	3.1778	339.171	3.1778
Plesovice - 14			30.26	144200	7550	2957000	598	9.86	0.15	0.3908	0.0056	0.05381	0.00034	0.037539	0.05303	0.00086	0.01682	0.00098	334.8	4.1	5.2	337.9	2.1	3	337	19	42	326	37	37	698000000000000	11000000000000	Plesovice - 14	0.05381	337.9	3	337.492	3.02556	337.543	3.02556
Plesovice - 15			36.828	183600	9720	3800000	777	8.824	0.086	0.3944	0.0049	0.0542	0.00043	0.30285	0.05302	0.00064	0.01666	0.00064	337.5	3.6	4.8	340.2	2.6	3.4	334	13	39	327	28	28	914000000000000	59000000000000	Plesovice - 15	0.0542	340.2	3.4	339.198	3.42371	339.349	3.42371
Plesovice - 16			24.306	198500	10530	4190000	868	8.693	0.084	0.3933	0.0059	0.05378	0.00064	0.66661	0.05355	0.00055	0.01619	0.00074	336.7	4.3	5.4	337.7	3.9	4.5	325	15	39	351	23	23	1017000000000000	49000000000000	Plesovice - 16	0.05378	337.7	4.5	336.474	4.51204	336.562	4.51204
Plesovice - 17			30.153	193700	10190	3980000	840	8.703	0.069	0.3968	0.0045	0.0543	0.00041	0.55681	0.05343	0.0005	0.01764	0.00067	339.3	3.3	4.6	340.8	2.5	3.3	356	14	43	346	21	21	990000000000000	57000000000000	Plesovice - 17	0.0543	340.8	3.3	339.621	3.3267	339.788	3.3267
Plesovice - 18			36.828	189900	9820	3880000	836	8.643	0.072	0.3946	0.0064	0.05409	0.00032	-0.018192	0.05282	0.00084	0.01737	0.00062	337.6	4.6	5.6	339.6	2	2.9	348	12	41	317	36	36	984000000000000	59000000000000	Plesovice - 18	0.05409	339.6	2.9	338.439	2.93279	338.521	2.93279
Plesovice - 19			34.373	213300	11280	4260000	939	5.732	0.041	0.3998	0.0056	0.0547	0.00042	0.5033	0.05315	0.00057	0.01708	0.00057	341.4	4.1	5.2	343.3	2.5	3.4	342	11	40	337	25	25	1133000000000000	72000000000000	Plesovice - 19	0.0547	343.3	3.4	341.815	3.42922	341.936	3.42922
Plesovice - 20			36.46	129300	6780	2620000	587	9.88	0.1	0.3966	0.0059	0.054	0.00035	0.33141	0.05316	0.00062	0.01727	0.00087	340.3	4	5	339	2.1	3	346	17	42	333	26	26	692000000000000	30000000000000	Plesovice - 20	0.054	339	3	338.61	3.02573	338.722	3.02573
91500 - 9			18.324	49300	3720	294000	56.5	2.633	0.038	1.834	0.052	0.1758	0.002	0.62856	0.0756	0.0018	0.0538	0.0031	1057	19	20	1044	11	13	1059	60	130	1090	50	50	232000000000000	11000000000000	91500 - 9	0.1758	1044	13	1050.22	13.1907	1049.79	13.1907
91500 - 10			34.373	50200	3700	313000	60.7	2.755	0.032	1.798	0.041	0.1753	0.0017	0.35887	0.0745	0.0016	0.0584	0.0026	1046	14	16	1041.1	9.2	11	1146	51	140	1048	44	44	250000000000000	15000000000000	91500 - 10	0.1753	1041.1	11	1046.79	11.1815	1046.56	11.1815
91500 - 11			32.715	52100	3870	323000	63.2	2.654	0.039	1.805	0.035	0.1782	0.0016	0.20719	0.0737	0.0016	0.0563	0.0032	1047	13	15	1057.3	8.6	11	1105	61	140	1041	42	42	264000000000000	14000000000000	91500 - 11	0.1782	1057.3	11	1062.7	11.1734	1062.18	11.1734
91500 - 12			36.46	55000	4000	341000	67.4	2.514	0.033	1.823	0.034	0.1785	0.0016	0.18897	0.0743	0.0014	0.0546	0.0026	1054	12	14	1059	8.5	11	1073	50	130	1044	37	37	283000000000000	16000000000000	91500 - 12	0.1785	1059	11	1063.93	11.1596	1063.38	11.1596
91500 - 13			22.097	56900	4170	357000	71.4	2.537	0.032	1.83	0.03	0.1789	0.0016	0.23669	0.0746	0.0011	0.0531	0.0027	1058	10	12	1061.1	8.7	11	1045	51	130	1063	31	31	302000000000000	13000000000000	91500 - 13	0.1789	1061.1	11	1065.59	11.1476	1065.16	11.1476
91500 - 14			31.488	51900	3810	322000	65.1	2.51	0.031	1.821	0.024	0.1786	0.0016	0.22003	0.0742	0.0013	0.0534	0.0026	1052.8	8.6	11	1059.3	8.7	11	1051	50	130	1050	33	33	271000000000000	14000000000000	91500 - 14	0.1786	1059.3	11	1064.53	11.1684	1064.21	11.1684
91500 - 15			34.802	54400	4060	337000	68.9	2.46	0.031	1.829	0.027	0.1782	0.0011	0.16477	0.0754	0.0011	0.0524	0.0019	1055.4	9.9	12	1057.1	5.9	8.7	1040	40	130	1075	30	30	288000000000000	16000000000000	91500 - 15	0.1782	1057.1	8.7	1061.9	8.87292	1061.62	8.87292
91500 - 16			27.068	63300	4740	403000	83.6	2.546	0.032	1.833	0.025	0.1773	0.0014	0.36757	0.0753	0.0011	0.053	0.0024	1057	9	12	1052.3	7.6	9.9	1042	46	120	1086	30	30	347000000000000	17000000000000	91500 - 16	0.1773	1052.3	9.9	1055.8	10.0283	1055.5	10.0283
91500 - 17			28.48	61800	4560	387000	81.7	2.461	0.031	1.816	0.026	0.1784	0.0015	0.3184	0.0743	0.0011	0.0527	0.0025	1050.7	9.3	12	1057.9	8.2	10	1038	48	120	1046	30	30	341000000000000	18000000000000	91500 - 17	0.1784	1057.9	10	1061.54	10.1315	1061.65	10.1315
91500 - 18			32.143	43800	3170	276000	59.4	2.701	0.032	1.791	0.027	0.1771	0.0018	0.36476	0.0736	0.0011	0.0514	0.0027	1041.6	9.9	12	1051.2	9.9	12	1013	52	120	1033	28	28	247000000000000	13000000000000	91500 - 18	0.1771	1051.2	12	1057.03	12.1817	1056.55	12.1817
91500 - 19			27.372	48500	3650	299000	65.9	2.508	0.041	1.863	0.042	0.1786	0.0016	0.01969	0.076	0.0016	0.0551	0.0027	1073	13	15	1059.1	8.9	11	1083	51	130	1105	42	42	273000000000000	13000000000000	91500 - 19	0.1786	1059.1	11	1064.28	11.1668	1064.16	11.1668
91500 - 20			26.362	49800	3660	306000	68.7	2.452	0.032	1.797	0.033	0.1751	0.0016	0.27893	0.0743	0.0014	0.0542	0.0026	1046	12	13	1040	8.8	11	1067	51	130	1044	37	37	281000000000000	14000000000000	91500 - 20	0.1751	1040	11	1044.89	11.1571	1044.73	11.1571
AUSZ7-1 - 9			34.413	2470	119	464000	89	3.127	0.043	0.0395	0.004	0.00583	0.00012	0.075757	0.0485	0.0048	0.00168	0.00032	39.3	3.9	3.9	37.48	0.75	0.79	34	6.6	7.6	140	190	190	11880000000000	710000000000	AUSZ7-1 - 9	0.00583	37.48	0.79	38.4471	0.838488	38.5103	0.838506
AUSZ7-1 - 10			35.109	2460	118	456000	88.4	3.145	0.048	0.0399	0.0046	0.00598	0.00011	0.062987	0.0491	0.0058	0.00186	0.00042	39.6	4.5	4.5	38.43	0.7	0.74	37.5	8.4	9.4	120	210	210	11930000000000	730000000000	AUSZ7-1 - 10	0.00598	38.43	0.74	39.4205	0.790444	39.4951	0.790462
AUSZ7-1 - 11			30.736	2690	131	487000	95.3	2.882	0.037	0.0415	0.0039	0.00601	0.00014	0.014314	0.0488	0.0049	0.0022	0.00048	41.2	3.8	3.9	38.65	0.92	0.95	44.4	9.6	11	150	190	190	13130000000000	800000000000	AUSZ7-1 - 11	0.00601	38.65	0.95	39.621	0.997553	39.6671	0.997567
AUSZ7-1 - 12			33.513	2430	119	449000	88.9	3.135	0.037	0.0408	0.004	0.00597	0.00014	-0.11345	0.0503	0.0053	0.00181	0.00043	40.5	3.9	3.9	38.35	0.92	0.96	36.5	8.7	9.6	190	200	200	12010000000000	690000000000	AUSZ7-1 - 12	0.00597	38.35	0.96	39.3367	1.0089	39.4276	1.00891
AUSZ7-1 - 13			34.986	2340	106.5	430000	86.1	3.126	0.045	0.0382	0.0034	0.00603	0.00014	0.21489	0.0466	0.0041	0.00149	0.00037	38	3.3	3.3	38.73	0.87	0.91	30	7.4	8.2	40	160	160	11760000000000	740000000000	AUSZ7-1 - 13	0.00603	38.73	0.91	39.732	0.95982	39.8275	0.959834
AUSZ7-1 - 14			34.392	2360	111	438000	88.5	3.055	0.038	0.0374	0.0037	0.00584	0.00015	0.12241	0.0489	0.005	0.00195	0.0004	37.2	3.6	3.6	37.54	0.96	1	39.4	8.1	9.3	120	190	190	11850000000000	770000000000	AUSZ7-1 - 14	0.00584	37.54	1	38.5093	1.04826	38.5766	1.04828
AUSZ7-1 - 15			34.373	2335	116	441000	90.2	3.045	0.03	0.0392	0.0039	0.00588	0.00011	-0.16876	0.0482	0.0049	0.00189	0.00039	38.9	3.8	3.8	37.79	0.67	0.72	38.2	7.9	9	120	190	190	12040000000000	720000000000	AUSZ7-1 - 15	0.00588	37.79	0.72	38.7617	0.76953	38.8355	0.769549
AUSZ7-1 - 16			30.444	2304	117	434000	90	3.128	0.038	0.0416	0.0044	0.00594	0.00015	0.083264	0.0512	0.0054	0.00173	0.00043	41.3	4.3	4.3	38.18	0.98	1	34.8	8.8	9.6	200	200	200	11990000000000	650000000000	AUSZ7-1 - 16	0.00594	38.18	1	39.1628	1.04881	39.2309	1.04882
AUSZ7-1 - 17			31.426	2563	129	477000	100.7	2.921	0.038	0.0417	0.0044	0.00593	0.00011	-0.033425	0.0522	0.006	0.00205	0.00042	41.4	4.3	4.3	38.13	0.69	0.73	41.3	8.4	9.6	220	220	220	13530000000000	770000000000	AUSZ7-1 - 17	0.00593	38.13	0.73	39.0801	0.777495	39.1339	0.777514
AUSZ7-1 - 18			27.13	2519	129	485000	104.5	2.898	0.038	0.041	0.0037	0.00591	0.00014	0.1598	0.0503	0.0041	0.0016	0.00037	40.8	3.6	3.7	37.98	0.91	0.95	32.3	7.5	8.4	250	170	170	13830000000000	700000000000	AUSZ7-1 - 18	0.00591	37.98	0.95	38.9207	0.995786	38.9969	0.995801
AUSZ7-1 - 19			26.516	2900	142	558000	123	2.723	0.038	0.04	0.0036	0.00585	0.00012	0.099819	0.0493	0.0043	0.00219	0.00041	39.8	3.5	3.5	37.59	0.74	0.78	44.1	8.3	9.7	150	170	170	16600000000000	870000000000	AUSZ7-1 - 19	0.00585	37.59	0.78	38.4745	0.822258	38.5565	0.822276
AUSZ7-1 - 20			16.415	2120	106	374000	83.9	2.849	0.042	0.0397	0.0057	0.00586	0.0002	-0.35626	0.0503	0.0081	0.00195	0.00067	39.5	5.6	5.6	37.7	1.3	1.3	39	13	14	150	300	300	11110000000000	640000000000	AUSZ7-1 - 20	0.00586	37.7	1.3	38.69	1.35222	38.7246	1.35223
AUSZ7-5 - 9			34.373	147	8.8	437000	83.8	1.609	0.016	0.0028	0.0012	0.000367	2.9e-05	-0.062703	0.06	0.028	9e-05	7.9e-05	2.9	1.3	1.3	2.36	0.19	0.19	1.8	1.6	1.6	-90	710	710	756000000000	80000000000	AUSZ7-5 - 9	0.000367	2.36	0.19	2.46599	0.199972	2.54475	0.217876
AUSZ7-5 - 10			36.951	139	8.7	413000	80.1	1.632	0.014	0.0032	0.0011	0.000365	3e-05	0.080811	0.065	0.023	0.000114	6.9e-05	3.3	1.1	1.1	2.35	0.19	0.19	2.3	1.4	1.4	140	600	600	717000000000	72000000000	AUSZ7-5 - 10	0.000365	2.35	0.19	2.45642	0.200055	2.53216	0.218141
AUSZ7-5 - 11			34.802	135	7.4	402000	78.7	1.656	0.018	0.0028	0.0013	0.00038	3.6e-05	0.010417	0.052	0.026	0.00012	8e-05	2.8	1.3	1.3	2.45	0.23	0.23	2.4	1.6	1.6	-430	680	680	707000000000	87000000000	AUSZ7-5 - 11	0.00038	2.45	0.23	2.5612	0.241749	2.63344	0.255774
AUSZ7-5 - 12			19.692	136	9	435000	86.1	1.667	0.019	0.0037	0.0015	0.000353	3.4e-05	-0.077874	0.067	0.026	0.00014	0.00011	3.7	1.5	1.5	2.27	0.22	0.22	2.9	2.3	2.3	570	780	780	752000000000	84000000000	AUSZ7-5 - 12	0.000353	2.27	0.22	2.37204	0.231042	2.45057	0.247925
AUSZ7-5 - 13			33.428	110	7.8	358000	71.6	1.666	0.018	0.0032	0.0012	0.000339	3.5e-05	0.037393	0.067	0.028	6.6e-05	5.1e-05	3.2	1.2	1.2	2.19	0.23	0.23	1.3	1	1	210	700	700	585000000000	71000000000	AUSZ7-5 - 13	0.000339	2.19	0.23	2.29233	0.241859	2.36018	0.259352
AUSZ7-5 - 14			34.802	123	6.2	364000	73.6	1.613	0.018	0.0024	0.0017	0.000379	4e-05	0.012247	0.067	0.055	9e-05	7.1e-05	2.4	1.7	1.7	2.44	0.26	0.26	1.8	1.4	1.5	-810	780	780	667000000000	79000000000	AUSZ7-5 - 14	0.000379	2.44	0.26	2.55175	0.273079	2.62771	0.285634
AUSZ7-5 - 15			31.304	127	8.3	357000	73	1.573	0.017	0.0037	0.0015	0.000393	4.2e-05	0.055357	0.07	0.03	0.0001	6.5e-05	3.8	1.5	1.5	2.53	0.27	0.27	2	1.3	1.3	170	710	710	675000000000	76000000000	AUSZ7-5 - 15	0.000393	2.53	0.27	2.64566	0.283551	2.72184	0.294831
AUSZ7-5 - 16			33.145	119	8.1	365000	75.7	1.556	0.017	0.0033	0.0016	0.000369	3.8e-05	-0.068177	0.066	0.037	0.00019	0.0001	3.3	1.6	1.6	2.38	0.25	0.25	3.8	2.1	2.1	-420	660	660	650000000000	73000000000	AUSZ7-5 - 16	0.000369	2.38	0.25	2.48944	0.262664	2.56075	0.276392
AUSZ7-5 - 17			35.232	127	8.5	375000	79.1	1.571	0.02	0.0035	0.0023	0.000372	3.9e-05	0.16661	0.082	0.05	0.00012	7.9e-05	3.6	2.3	2.3	2.39	0.25	0.25	2.4	1.6	1.6	-490	800	800	715000000000	85000000000	AUSZ7-5 - 17	0.000372	2.39	0.25	2.49828	0.26247	2.57936	0.275992
AUSZ7-5 - 18			35.293	120	7.3	381000	82.7	1.554	0.017	0.0028	0.0012	0.000345	3.1e-05	0.048588	0.054	0.026	5.4e-05	8.2e-05	2.8	1.2	1.2	2.22	0.2	0.2	1.1	1.7	1.7	-130	690	690	691000000000	78000000000	AUSZ7-5 - 18	0.000345	2.22	0.2	2.32112	0.210355	2.39803	0.229597
AUSZ7-5 - 19			34.802	130	5.1	375000	82.7	1.529	0.015	0.0024	0.0013	0.000371	4e-05	0.22872	0.051	0.028	0.000113	8.3e-05	2.4	1.3	1.3	2.44	0.27	0.27	2.3	1.7	1.7	-220	760	760	800000000000	100000000000	AUSZ7-5 - 19	0.000371	2.44	0.27	2.54861	0.283083	2.57073	0.295731
AUSZ7-5 - 20			34.373	123	8	380000	85.3	1.563	0.02	0.0034	0.0011	0.000354	3.3e-05	-0.17506	0.086	0.034	0.000121	6.6e-05	3.4	1.2	1.2	2.28	0.21	0.21	2.4	1.3	1.4	340	670	670	721000000000	73000000000	AUSZ7-5 - 20	0.000354	2.28	0.21	2.38316	0.220736	2.45798	0.238255
GJ-1 - 28			35.066	147800	8850	1672000	321	29.88	0.36	0.813	0.011	0.0973	0.00055	0.42431	0.06028	0.00068	0.031	0.0026	603.9	6	7.8	598.6	3.2	5	616	50	85	611	25	25	671000000000000	39000000000000	GJ-1 - 28	0.0973	598.6	5	598.03	5.04866	598.089	5.04866
GJ-1 - 29			35.039	150000	8840	1688000	324	29.55	0.5	0.804	0.011	0.09791	0.00059	0.37289	0.05966	0.00079	0.0306	0.0026	600	6.4	8.2	602.2	3.5	5.1	609	52	85	592	28	28	681000000000000	40000000000000	GJ-1 - 29	0.09791	602.2	5.1	601.569	5.1482	601.613	5.1482
GJ-1 - 30			35.038	147600	8760	1662000	319	29.27	0.52	0.813	0.011	0.09803	0.00056	0.36591	0.05998	0.00071	0.0287	0.0028	603.8	6	7.8	602.9	3.3	5	571	55	84	609	25	25	672000000000000	38000000000000	GJ-1 - 30	0.09803	602.9	5	602.32	5.04943	602.367	5.04943
GJ-1 - 31			34.95	147000	8800	1652000	320	30.46	0.49	0.818	0.01	0.09819	0.00057	0.2789	0.0604	0.00074	0.0339	0.0037	606.5	5.8	7.7	603.8	3.3	5	672	73	100	615	27	27	673000000000000	39000000000000	GJ-1 - 31	0.09819	603.8	5	603.213	5.0496	603.299	5.0496
GJ-1 - 32			35.052	146700	8800	1655000	321	29.61	0.49	0.8201	0.0074	0.09805	0.00066	0.32592	0.06031	0.00059	0.0285	0.0027	608	4.1	6.5	602.9	3.9	5.4	568	53	83	613	21	21	675000000000000	39000000000000	GJ-1 - 32	0.09805	602.9	5.4	602.303	5.44506	602.467	5.44506
GJ-1 - 33			35.053	147800	8850	1664000	323	29.23	0.4	0.8178	0.0086	0.09844	0.00055	0.29021	0.06017	0.00057	0.0296	0.0027	606.7	4.8	6.9	605.2	3.2	5	589	54	85	608	21	21	683000000000000	41000000000000	GJ-1 - 33	0.09844	605.2	5	604.554	5.04992	604.71	5.04992
GJ-1 - 34			35.036	143600	8610	1627000	319	29.95	0.48	0.818	0.013	0.0977	0.00064	0.3103	0.06059	0.00092	0.028	0.0028	606.9	7.5	9	600.9	3.8	5.3	558	56	83	626	34	34	669000000000000	39000000000000	GJ-1 - 34	0.0977	600.9	5.3	600.339	5.34577	600.447	5.34577
GJ-1 - 35			35.044	144800	8670	1648000	323	29.47	0.5	0.8154	0.0091	0.09724	0.00066	0.55295	0.06091	0.00064	0.0331	0.0032	605.4	5.1	7.1	598.2	3.9	5.4	657	62	96	638	23	23	675000000000000	40000000000000	GJ-1 - 35	0.09724	598.2	5.4	597.607	5.44428	597.715	5.44428
GJ-1 - 36			35.041	146400	8590	1639000	321	29.84	0.55	0.8039	0.0095	0.09797	0.00066	0.11676	0.0596	0.00081	0.0308	0.003	599.8	5.5	7.5	602.5	3.8	5.4	613	58	89	595	29	29	682000000000000	39000000000000	GJ-1 - 36	0.09797	602.5	5.4	601.863	5.44499	601.96	5.44499
GJ-1 - 37			35.05	141200	8520	1599000	317	29.41	0.56	0.8162	0.0095	0.09765	0.00053	0.30254	0.06065	0.00075	0.0268	0.0026	605.7	5.3	7.3	600.6	3.1	4.9	534	51	78	624	27	27	663000000000000	38000000000000	GJ-1 - 37	0.09765	600.6	4.9	600.075	4.95016	600.187	4.95016
GJ-1 - 38			35.039	142800	8540	1604000	318	29.96	0.57	0.811	0.011	0.09781	0.00054	0.45599	0.06015	0.00073	0.0298	0.0024	602.5	6.4	8.1	601.6	3.2	4.9	594	47	81	610	27	27	672000000000000	38000000000000	GJ-1 - 38	0.09781	601.6	4.9	601.021	4.95039	601.076	4.95039
GJ-1 - 39			35.07	143900	8610	1637000	324	29.23	0.46	0.803	0.0087	0.09779	0.00053	0.27216	0.05981	0.00063	0.029	0.0029	598.4	4.9	7	601.5	3.1	4.9	576	58	86	595	23	23	679000000000000	39000000000000	GJ-1 - 39	0.09779	601.5	4.9	600.881	4.95043	600.92	4.95043
GJ-1 - 40			35.064	141100	8420	1594000	319	30.05	0.44	0.807	0.01	0.09751	0.00061	0.22469	0.05989	0.00079	0.0346	0.0027	600.6	5.9	7.7	599.8	3.6	5.2	688	52	92	597	29	29	670000000000000	39000000000000	GJ-1 - 40	0.09751	599.8	5.2	599.235	5.24664	599.327	5.24664
GJ-1 - 41			35.042	140000	8380	1570000	314	29.88	0.43	0.8146	0.0085	0.09846	0.00062	0.28992	0.06022	0.00065	0.0311	0.0022	604.9	4.7	6.9	605.3	3.6	5.3	619	43	81	613	23	23	663000000000000	38000000000000	GJ-1 - 41	0.09846	605.3	5.3	604.77	5.34653	604.939	5.34653
GJ-1 - 42			35.071	140500	8270	1582000	317	29.64	0.38	0.817	0.01	0.09857	0.00061	0.47893	0.06006	0.00063	0.0311	0.003	606.3	5.8	7.7	606	3.6	5.2	617	58	90	604	23	23	671000000000000	39000000000000	GJ-1 - 42	0.09857	606	5.2	605.423	5.24771	605.539	5.24771
GJ-1 - 43			35.049	137200	8170	1565000	317	30.22	0.56	0.81	0.011	0.09723	0.00091	0.4192	0.05991	0.00081	0.0278	0.0028	602	5.9	7.8	598.2	5.4	6.5	553	55	83	597	30	30	662000000000000	38000000000000	GJ-1 - 43	0.09723	598.2	6.5	597.682	6.53515	597.728	6.53515
GJ-1 - 44			35.045	136800	8160	1552000	314	29.88	0.48	0.802	0.01	0.09753	0.00074	-0.061263	0.06017	0.00086	0.0289	0.003	597.9	5.7	7.6	599.9	4.3	5.7	575	59	87	612	32	32	654000000000000	39000000000000	GJ-1 - 44	0.09753	599.9	5.7	599.428	5.74189	599.534	5.74189
GJ-1 - 45			35.051	137700	8150	1554000	314	29.84	0.48	0.8024	0.0098	0.09773	0.00082	0.54653	0.06014	0.00065	0.03	0.0022	598	5.5	7.4	601.1	4.8	6.1	597	44	79	606	23	23	661000000000000	37000000000000	GJ-1 - 45	0.09773	601.1	6.1	600.586	6.13859	600.668	6.13859
GJ-1 - 46			35.061	138800	8350	1563000	320	29.48	0.44	0.8184	0.0087	0.09819	0.00063	0.39921	0.06083	0.00069	0.0283	0.0029	607	4.8	7	603.8	3.7	5.3	564	58	85	635	24	24	676000000000000	39000000000000	GJ-1 - 46	0.09819	603.8	5.3	603.196	5.34626	603.283	5.34626
GJ-1 - 47			35.043	140700	8340	1606000	329	30.16	0.5	0.8024	0.0091	0.09746	0.00065	0.283	0.05997	0.00066	0.0309	0.0024	598	5.1	7.1	599.5	3.8	5.4	614	47	83	600	24	24	679000000000000	38000000000000	GJ-1 - 47	0.09746	599.5	5.4	598.883	5.44449	598.984	5.44449
GJ-1 - 48			35.035	140300	8380	1595000	326	29.7	0.48	0.8108	0.0078	0.09806	0.00064	0.48182	0.06038	0.00058	0.0311	0.0032	602.8	4.4	6.7	603	3.8	5.3	617	63	93	616	21	21	686000000000000	39000000000000	GJ-1 - 48	0.09806	603	5.3	602.34	5.34614	602.466	5.34614
GJ-1 - 49			35.044	136900	8150	1531000	318	29.87	0.54	0.8081	0.0099	0.09753	0.00064	0.11777	0.06044	0.00084	0.03	0.0028	601.2	5.5	7.5	599.9	3.7	5.3	596	55	86	616	30	30	671000000000000	39000000000000	GJ-1 - 49	0.09753	599.9	5.3	599.329	5.3456	599.439	5.3456
GJ-1 - 50			35.066	138300	8180	1554000	323	29.44	0.53	0.8077	0.0089	0.09774	0.00061	0.43396	0.0599	0.00056	0.0297	0.0026	601	5	7.1	601.2	3.6	5.2	598	53	86	598	20	20	673000000000000	38000000000000	GJ-1 - 50	0.09774	601.2	5.2	600.616	5.24688	600.66	5.24688
GJ-1 - 51			35.049	138000	8120	1559000	324	30.23	0.55	0.8089	0.009	0.09819	0.00061	0.47081	0.06005	0.00059	0.0311	0.0026	601.7	5	7.1	603.8	3.6	5.2	619	52	86	604	21	21	681000000000000	40000000000000	GJ-1 - 51	0.09819	603.8	5.2	603.167	5.24736	603.255	5.24736
GJ-1 - 52			29.897	142200	8420	1613000	341	29.98	0.62	0.815	0.011	0.09886	0.00078	0.38888	0.05985	0.00081	0.0313	0.0028	605	6.1	7.9	607.7	4.6	6	623	55	89	595	30	30	725000000000000	39000000000000	GJ-1 - 52	0.09886	607.7	6	606.818	6.03994	606.949	6.03994
GJ-1 - 53			11.472	140800	8340	1554000	328	29.7	1.4	0.808	0.022	0.0989	0.0011	0.33066	0.0597	0.0013	0.0261	0.003	601	12	13	608.1	6.6	7.7	521	59	83	588	48	48	700000000000000	28000000000000	GJ-1 - 53	0.0989	608.1	7.7	607.355	7.72755	607.315	7.72755
GJ-1 - 54			21.553	147100	8690	1727000	365	29.25	0.58	0.801	0.01	0.09738	0.00054	0.36718	0.05977	0.00073	0.0317	0.0035	597	5.8	7.6	599	3.2	4.9	629	69	99	594	27	27	764000000000000	35000000000000	GJ-1 - 54	0.09738	599	4.9	597.928	4.95164	598.079	4.95164
GJ-1 - 55			35.047	124600	7400	1388000	299	30.13	0.76	0.812	0.012	0.09812	0.00065	0.16889	0.06016	0.00089	0.0294	0.0028	603.1	6.6	8.3	603.4	3.8	5.4	584	55	85	605	32	32	630000000000000	37000000000000	GJ-1 - 55	0.09812	603.4	5.4	603.071	5.44554	603.135	5.44554
GJ-1 - 56			35.072	132900	7940	1496000	323	29.57	0.5	0.815	0.0094	0.09783	0.00064	0.16736	0.06026	0.00072	0.0317	0.0028	605.1	5.2	7.3	601.7	3.8	5.3	630	54	89	614	27	27	673000000000000	40000000000000	GJ-1 - 56	0.09783	601.7	5.3	601.115	5.3459	601.188	5.3459
GJ-1 - 57			35.055	131200	7850	1474000	318	29.92	0.55	0.8074	0.008	0.09762	0.00063	0.32619	0.05976	0.00049	0.0305	0.0032	600.9	4.5	6.7	600.5	3.7	5.3	607	62	92	597	19	19	662000000000000	37000000000000	GJ-1 - 57	0.09762	600.5	5.3	599.98	5.34573	600.017	5.34573
GJ-1 - 58			35.044	122100	7200	1372000	303	30.15	0.63	0.815	0.013	0.09785	0.0009	0.80052	0.06019	0.00071	0.0317	0.0029	605	7	8.6	601.8	5.3	6.5	631	57	90	608	25	25	635000000000000	38000000000000	GJ-1 - 58	0.09785	601.8	6.5	601.441	6.53641	601.521	6.53641
GJ-1 - 59			35.065	122200	7230	1382000	305	29.19	0.43	0.804	0.011	0.09705	0.00079	0.58886	0.06028	0.00069	0.0297	0.0031	598.9	6.1	7.9	597.1	4.7	6	591	61	90	611	25	25	632000000000000	37000000000000	GJ-1 - 59	0.09705	597.1	6	596.762	6.03944	596.842	6.03944
GJ-1 - 60			35.064	122400	7320	1373000	303	29.77	0.65	0.8211	0.0099	0.098	0.00061	0.31107	0.06062	0.00075	0.0293	0.0022	608.5	5.5	7.5	602.6	3.6	5.2	584	44	78	623	27	27	638000000000000	37000000000000	GJ-1 - 60	0.098	602.6	5.2	602.222	5.24727	602.384	5.24727
GJ-1 - 61			35.055	131600	7870	1478000	331	29.64	0.53	0.8211	0.0097	0.09795	0.00064	0.44192	0.06058	0.00064	0.0282	0.0021	608.5	5.4	7.4	602.4	3.8	5.3	562	40	74	622	23	23	696000000000000	42000000000000	GJ-1 - 61	0.09795	602.4	5.3	601.684	5.34609	601.767	5.34609
GJ-1 - 62			35.04	129900	7760	1452000	325	29.67	0.58	0.817	0.01	0.09751	0.00067	0.49779	0.06036	0.00068	0.032	0.003	607.3	5.4	7.2	599.8	4	5.5	636	59	92	614	25	25	687000000000000	39000000000000	GJ-1 - 62	0.09751	599.8	5.5	599.137	5.54352	599.234	5.54352
GJ-1 - 63			35.053	129900	7810	1449000	325	29.66	0.44	0.82	0.012	0.09846	0.00061	0.24735	0.06012	0.00086	0.0313	0.0024	608	6.4	8.2	605.4	3.6	5.2	622	47	84	604	31	31	687000000000000	41000000000000	GJ-1 - 63	0.09846	605.4	5.2	604.731	5.24767	604.806	5.24767
NIST 610 - 12			35.04	358000	326000	1770000	341	0.937	0.007	27.67	0.5	0.2208	0.0039	0.96126	0.9079	0.0043	0.516	0.0098	3406	18	21	1286	21	22	8400	130	780	5206.6	9.8	9.8	2030000000000000	170000000000000	NIST 610 - 12	0.2208	1286	22	1275.64	22.0082	1276.77	22.0082
NIST 610 - 13			35.041	345000	307000	1710000	332	0.9323	0.0067	27.55	0.41	0.2216	0.0036	0.95762	0.9075	0.0043	0.5186	0.0087	3404	15	19	1290	19	21	8460	120	810	5205.7	9.6	9.6	1990000000000000	170000000000000	NIST 610 - 13	0.2216	1290	21	1279.78	21.0248	1281.11	21.0248
NIST 610 - 14			35.045	348000	313000	1730000	339	0.9314	0.0069	27.56	0.49	0.2202	0.0037	0.94031	0.9073	0.0054	0.5116	0.0085	3402	17	20	1282	19	21	8360	110	750	5205	12	12	2000000000000000	170000000000000	NIST 610 - 14	0.2202	1282	21	1271.8	21.0228	1273.73	21.0228
NIST 610 - 15			35.104	340000	306000	1680000	334	0.9268	0.0082	27.81	0.43	0.2225	0.0035	0.94743	0.9064	0.0043	0.501	0.01	3411	15	19	1295	18	20	8200	140	770	5203.1	9.8	9.8	2020000000000000	170000000000000	NIST 610 - 15	0.2225	1295	20	1284.61	20.045	1285.71	20.045
NIST 610 - 16			35.041	342000	308000	1690000	339	0.9398	0.0054	27.54	0.51	0.2215	0.004	0.9501	0.9077	0.0051	0.4906	0.0078	3401	18	21	1289	21	22	8060	100	750	5206	11	11	2030000000000000	160000000000000	NIST 610 - 16	0.2215	1289	22	1278.62	22.009	1280.44	22.009
NIST 610 - 17			35.047	325000	295000	1600000	326	0.9332	0.0077	27.61	0.43	0.2218	0.0032	0.95274	0.9067	0.0045	0.4982	0.0085	3408	16	19	1291	17	19	8170	110	760	5204	10	10	1960000000000000	160000000000000	NIST 610 - 17	0.2218	1291	19	1280.89	19.0594	1282.27	19.0594
NIST 610 - 18			35.035	334000	300000	1650000	339	0.9245	0.0068	27.79	0.47	0.2228	0.0034	0.95071	0.9089	0.0048	0.5038	0.0086	3410	16	19	1297	18	20	8240	120	770	5209	11	11	2030000000000000	170000000000000	NIST 610 - 18	0.2228	1297	20	1286.56	20.0461	1287.25	20.0461
NIST 610 - 19			35.043	323000	290000	1590000	332	0.9199	0.007	27.65	0.48	0.2215	0.0036	0.93382	0.9061	0.0057	0.504	0.01	3405	17	20	1289	19	21	8240	140	770	5203	13	13	2010000000000000	170000000000000	NIST 610 - 19	0.2215	1289	21	1278.7	21.0252	1280.51	21.0252
NIST 610 - 20			35.048	327000	293000	1610000	343	0.9205	0.0066	27.62	0.49	0.2221	0.0039	0.95249	0.9065	0.005	0.5	0.01	3407	18	21	1292	20	22	8200	130	770	5203	11	11	2050000000000000	170000000000000	NIST 610 - 20	0.2221	1292	22	1281.52	22.0104	1283.51	22.0104
NIST 610 - 21			35.135	318000	289000	1580000	345	0.917	0.0073	27.7	0.45	0.2206	0.0032	0.95027	0.9077	0.0047	0.4884	0.0077	3410	16	19	1285	17	18	8030	100	750	5206	11	11	2030000000000000	170000000000000	NIST 610 - 21	0.2206	1285	18	1274.65	18.0807	1275.72	18.0807
NIST 610 - 22			35.058	311000	279000	1552000	347	0.9308	0.0068	27.22	0.41	0.2192	0.0036	0.93236	0.9061	0.0057	0.49	0.0077	3390	15	18	1277	19	21	8060	100	750	5203	13	13	2040000000000000	160000000000000	NIST 610 - 22	0.2192	1277	21	1266.68	21.0226	1268.33	21.0226
NIST 610 - 23			35.055	316000	281000	1560000	350	0.9212	0.0068	27.56	0.41	0.221	0.0036	0.94754	0.9062	0.0048	0.494	0.01	3402	15	18	1287	19	20	8110	140	760	5203	11	11	2080000000000000	170000000000000	NIST 610 - 23	0.221	1287	20	1276.44	20.0451	1277.63	20.0451
NIST 610 - 24			35.04	315000	285000	1570000	352	0.9177	0.0084	27.74	0.39	0.2208	0.0032	0.9186	0.9098	0.0049	0.4895	0.0093	3409	14	17	1286	17	19	8050	130	760	5211	11	11	2100000000000000	170000000000000	NIST 610 - 24	0.2208	1286	19	1275.37	19.0649	1276.51	19.0649
LR_11_MSZ-1 - 25B	inner part (repeat)	disc.	17.742	1690	87	691000	132.6	2.209	0.038	0.0202	0.0028	0.00282	0.00012	0.32265	0.0532	0.007	0.00094	0.00027	20.3	2.8	2.8	18.18	0.79	0.8	18.9	5.5	5.9	340	270	270	8480000000000	730000000000	LR_11_MSC-1 - 25	0.00282	18.18	0.8	18.6909	0.830324	18.7357	0.8304
LR_11_MSZ-1 - 26	inner part	disc.	8.3622	4240	218	1920000	368.5	2.002	0.034	0.0191	0.0025	0.00262	0.00011	-0.24189	0.0528	0.0081	0.00093	0.00034	19.2	2.5	2.5	16.85	0.69	0.7	18.8	6.9	7.2	370	340	340	23070000000000	560000000000	LR_11_MSC-1 - 26	0.00262	16.85	0.7	17.209	0.719367	17.2993	0.719469
LR_11_MSZ-1 - 27	inner part		6.7362	20230	904	9080000	1743	1.749	0.05	0.017	0.0014	0.002737	3.8e-05	0.38177	0.0461	0.0024	0.0011	0.00013	17.1	1.4	1.4	17.62	0.24	0.27	22.2	2.7	3.7	-30	130	130	113500000000000	5300000000000	LR_11_MSC-1 - 27	0.002737	17.62	0.27	17.8078	0.276403	17.8803	0.276647
LR_11_MSZ-1 - 28	inner part		27.293	4990	256	1930000	370	1.439	0.075	0.0176	0.0017	0.002567	5.5e-05	0.31127	0.0499	0.0049	0.00088	0.00011	17.7	1.7	1.7	16.53	0.35	0.37	17.7	2.1	2.9	160	180	180	24700000000000	2400000000000	LR_11_MSC-1 - 28	0.002567	16.53	0.37	16.8745	0.385429	16.9437	0.385627
LR_11_MSZ-1 - 29	inner part		10.569	4370	195	2026000	389.2	1.688	0.06	0.0159	0.0023	0.00256	6.1e-05	-0.3827	0.0435	0.0066	0.00071	0.00013	16	2.3	2.3	16.48	0.39	0.41	14.4	2.6	3	10	300	300	23810000000000	550000000000	LR_11_MSC-1 - 29	0.00256	16.48	0.41	16.8276	0.425743	16.9019	0.425923
LR_11_MSZ-1 - 30	rim		13.356	2350	117	975000	187	2.063	0.03	0.0177	0.0035	0.002573	7.5e-05	0.27362	0.053	0.01	0.0008	0.00034	17.8	3.5	3.5	16.57	0.48	0.49	16.2	6.8	7.1	330	340	340	11120000000000	690000000000	LR_11_MSC-1 - 30	0.002573	16.57	0.49	17.005	0.512105	17.0726	0.512253
LR_11_MSZ-1 - 31	rim		16.957	3530	174	1398000	268.6	1.933	0.02	0.0178	0.0015	0.002562	6e-05	-0.16323	0.0501	0.0043	0.00075	0.00018	17.9	1.5	1.5	16.49	0.39	0.4	15.2	3.6	4	180	170	170	16210000000000	640000000000	LR_11_MSC-1 - 31	0.002562	16.49	0.4	16.8807	0.418603	16.9578	0.418786
LR_11_MSZ-1 - 32	inner part		12.606	6470	318	2922000	561.6	1.501	0.041	0.0177	0.0013	0.002609	4.6e-05	-0.08774	0.0496	0.0039	0.00104	0.00021	17.8	1.3	1.3	16.8	0.29	0.31	21.1	4.2	4.8	170	160	160	35510000000000	830000000000	LR_11_MSC-1 - 32	0.002609	16.8	0.31	17.1091	0.323167	17.1784	0.323396
LR_11_MSZ-1 - 33	inner part	?young	34.908	17420	802	7380000	1419	1.739	0.096	0.01665	0.00058	0.002564	2.9e-05	0.016561	0.0474	0.0019	0.000857	5.1e-05	16.87	0.6	0.63	16.51	0.19	0.22	17.3	1	2.2	81	80	80	88000000000000	6600000000000	LR_11_MSC-1 - 33	0.002564	16.51	0.22	16.7138	0.227579	16.7839	0.227915
LR_11_MSZ-1 - 34	rim	?young	18.666	3180	140	1355000	260	1.603	0.017	0.0157	0.0016	0.002479	5.7e-05	-0.034514	0.0461	0.0051	0.0007	0.00017	15.8	1.6	1.6	15.96	0.37	0.38	14.1	3.5	3.8	20	200	200	15700000000000	1000000000000	LR_11_MSC-1 - 34	0.002479	15.96	0.38	16.3416	0.398242	16.415	0.398448
LR_11_MSZ-1 - 35	rim	disc.	35.15	3680	760	1253000	241	2.02	0.025	0.095	0.02	0.00327	0.00017	0.91534	0.199	0.035	0.00405	0.00097	95	19	19	21.1	1.1	1.1	82	19	22	2320	370	370	18000000000000	1100000000000	LR_11_MSC-1 - 35	0.00327	21.1	1.1	21.5849	1.13044	21.6011	1.13048
LR_11_MSZ-1 - 36	rim	disc.	34.981	12700	3290	4100000	780	0.64	0.14	0.83	0.45	0.0144	0.0059	0.97749	0.349	0.041	0.014	0.0051	480	180	180	91	37	37	280	100	110	3630	170	170	93000000000000	30000000000000	LR_11_MSC-1 - 36	0.0144	91	37	92.09	37.444	93.3345	37.444
LR_11_MSZ-1 - 37	inner part	?young	28.847	25700	1160	11300000	2180	1.316	0.054	0.01623	0.00055	0.002509	2.9e-05	0.25755	0.0468	0.0015	0.000799	4.2e-05	16.34	0.55	0.58	16.16	0.19	0.22	16.15	0.85	2	50	65	65	137000000000000	15000000000000	LR_11_MSC-1 - 37	0.002509	16.16	0.22	16.3122	0.225048	16.3787	0.225404
LR_11_MSZ-1 - 38	rim		35.15	4950	229	2090000	403	1.989	0.035	0.0168	0.0011	0.00257	3.9e-05	0.019105	0.0464	0.0027	0.000848	8.9e-05	16.9	1.1	1.1	16.55	0.25	0.27	17.1	1.8	2.6	80	120	120	24800000000000	1800000000000	LR_11_MSC-1 - 38	0.00257	16.55	0.27	16.8945	0.286103	16.963	0.286369
LR_11_MSZ-1 - 39	rim	disc.	27.635	7910	728	3220000	620	2.237	0.036	0.0366	0.0057	0.002692	3.8e-05	0.21614	0.095	0.014	0.00171	0.00027	36.3	5.6	5.6	17.33	0.24	0.27	34.6	5.4	6.7	1350	310	310	38700000000000	1900000000000	LR_11_MSC-1 - 39	0.002692	17.33	0.27	17.6389	0.283359	17.7119	0.283604
LR_11_MSZ-1 - 40	inner part	?young	35.15	8100	364	3610000	690	1.236	0.065	0.0168	0.0011	0.002545	3.1e-05	0.030787	0.0471	0.003	0.000771	8.1e-05	16.9	1.1	1.1	16.39	0.2	0.22	15.6	1.6	2.4	60	120	120	45600000000000	8600000000000	LR_11_MSC-1 - 40	0.002545	16.39	0.22	16.6641	0.231968	16.7319	0.232303
LR_11_MSZ-1 - 41	inner part	disc.	35.079	3100	1010	470000	91	2.68	0.51	1.78	0.68	0.0224	0.0052	0.1771	0.59	0.19	0.064	0.035	830	180	180	142	32	32	1150	580	590	4110	530	530	18500000000000	7300000000000	LR_11_MSC-1 - 41	0.0224	142	32	145.237	32.7374	146.096	32.7374
LR_11_MSZ-1 - 42	rim		22.302	5700	270	2408000	464	1.717	0.013	0.0179	0.0016	0.002694	4.7e-05	-0.067431	0.0486	0.0046	0.00082	0.00012	18	1.6	1.6	17.34	0.3	0.32	16.7	2.4	3	160	190	190	29800000000000	1400000000000	LR_11_MSC-1 - 42	0.002694	17.34	0.32	17.6795	0.334933	17.7553	0.33514
LR_11_MSZ-1 - 43	inner part		34.908	2520	113	1068000	206	1.085	0.015	0.016	0.0014	0.002649	5.8e-05	0.037166	0.0444	0.0039	0.00089	0.00012	16.1	1.4	1.4	17.05	0.37	0.39	17.9	2.4	3.2	-40	160	160	14000000000000	890000000000	LR_11_MSC-1 - 43	0.002649	17.05	0.39	17.4709	0.410458	17.5474	0.410633
LR_11_MSZ-1 - 44	inner part		27.878	1826	89	759000	146.2	1.484	0.021	0.0168	0.0019	0.002563	6.5e-05	-0.012384	0.049	0.0057	0.00096	0.00015	16.9	1.9	1.9	16.5	0.42	0.43	19.5	3.1	3.8	190	220	220	9140000000000	410000000000	LR_11_MSC-1 - 44	0.002563	16.5	0.43	16.9553	0.453351	17.0287	0.45352
LR_11_MSZ-1 - 45	rim		35.15	16650	760	7080000	1364	0.8418	0.0094	0.01673	0.0007	0.002628	2.6e-05	-0.021375	0.046	0.0019	0.000893	4e-05	16.84	0.7	0.72	16.92	0.17	0.2	18.05	0.8	2.2	20	81	81	96800000000000	6500000000000	LR_11_MSC-1 - 45	0.002628	16.92	0.2	17.1182	0.20746	17.1898	0.207812
LR_11_MSZ-1 - 46	rim	disc.	39.271	38450	2193	16250000	3130	0.802	0.035	0.021	0.0015	0.002578	3.1e-05	0.9417	0.0573	0.0026	0.000919	3.2e-05	21	1.4	1.5	16.6	0.2	0.23	18.56	0.65	2.2	473	84	84	220500000000000	5600000000000	LR_11_MSC-1 - 46	0.002578	16.6	0.23	16.7044	0.23317	16.7747	0.233495
LR_11_MSZ-1 - 47	rim		19.636	11080	510	4970000	959	2.032	0.022	0.01652	0.00089	0.002561	4.1e-05	-0.0021477	0.0471	0.0028	0.000814	9.1e-05	16.63	0.89	0.91	16.49	0.26	0.28	16.4	1.8	2.6	90	120	120	57800000000000	1700000000000	LR_11_MSC-1 - 47	0.002561	16.49	0.28	16.7397	0.289759	16.8104	0.290024
LR_11_MSZ-1 - 48	rim	disc.	35.15	14100	7600	2100000	405	1.655	0.078	0.666	0.098	0.0082	0.00086	0.90722	0.561	0.023	0.0201	0.0029	517	55	55	52.6	5.5	5.5	401	57	73	4365	85	85	69900000000000	8900000000000	LR_11_MSC-1 - 48	0.0082	52.6	5.5	53.3298	5.57877	53.445	5.57877
LR_11_MSZ-1 - 49	inner part		31.999	3110	157	1243000	239.7	2.44	0.12	0.0182	0.0017	0.002716	4.7e-05	-0.0088677	0.0484	0.0046	0.00091	0.00016	18.3	1.7	1.8	17.48	0.3	0.32	18.3	3.2	3.8	120	180	180	15020000000000	630000000000	LR_11_MSC-1 - 49	0.002716	17.48	0.32	17.9032	0.341006	17.9804	0.341206
LR_11_MSZ-1 - 50	rim		23.999	6780	322	2970000	573	1.466	0.048	0.0178	0.0013	0.00259	5.2e-05	0.21189	0.0495	0.0034	0.00085	0.0001	17.9	1.3	1.3	16.67	0.33	0.35	17.1	2.1	2.9	170	140	140	36600000000000	3000000000000	LR_11_MSC-1 - 50	0.00259	16.67	0.35	16.9733	0.362758	17.0506	0.362965
LR_11_MSZ-1 - 51	inner part		20.363	8070	349	3590000	693	1.174	0.062	0.0159	0.0012	0.0026	4.4e-05	0.14869	0.0443	0.0032	0.000859	6.4e-05	16	1.2	1.2	16.74	0.28	0.3	17.4	1.3	2.3	-50	130	130	46100000000000	6400000000000	LR_11_MSC-1 - 51	0.0026	16.74	0.3	17.0187	0.311335	17.0902	0.311574
LR_11_MSZ-1 - 52	rim	?young	34.908	8660	402	3700000	713	2.115	0.017	0.01686	0.00099	0.002553	3e-05	0.11859	0.0469	0.0026	0.000872	8.4e-05	16.97	0.99	1	16.44	0.19	0.22	17.6	1.7	2.6	80	110	110	43100000000000	3000000000000	LR_11_MSC-1 - 52	0.002553	16.44	0.22	16.7212	0.232454	16.7904	0.232787
LR_11_MSZ-1 - 53	inner part		21.575	11660	586	5180000	999	0.867	0.016	0.01727	0.00094	0.002573	5.4e-05	0.32522	0.049	0.0025	0.000832	5.6e-05	17.39	0.93	0.95	16.56	0.35	0.36	16.8	1.1	2.2	140	100	100	69000000000000	5100000000000	LR_11_MSC-1 - 53	0.002573	16.56	0.36	16.7912	0.368773	16.8693	0.368979
LR_11_MSZ-1 - 54	rim		17.696	32500	1467	14400000	2770	0.642	0.025	0.01667	0.00052	0.00261	3e-05	0.16545	0.0462	0.0015	0.000913	3.2e-05	16.78	0.52	0.55	16.8	0.19	0.22	18.45	0.64	2.2	23	66	66	210000000000000	19000000000000	LR_11_MSC-1 - 54	0.00261	16.8	0.22	16.911	0.223411	16.9871	0.223742
LR_11_MSZ-1 - 55	rim	disc.	35.15	4250	810	1390000	268	1.912	0.059	0.086	0.018	0.00326	0.00019	0.92188	0.172	0.03	0.00352	0.00072	82	17	17	21	1.2	1.2	71	15	17	2120	360	360	21800000000000	2000000000000	LR_11_MSC-1 - 55	0.00326	21	1.2	21.4554	1.23021	21.5083	1.23025
LR_11_MSZ-1 - 56	inner part		25.696	4760	225	2030000	393	1.713	0.098	0.0175	0.0012	0.002595	4.4e-05	-0.06944	0.0491	0.0034	0.00093	0.0001	17.6	1.2	1.2	16.7	0.29	0.31	18.8	2	2.9	140	140	140	24100000000000	3300000000000	LR_11_MSC-1 - 56	0.002595	16.7	0.31	17.0508	0.326015	17.1303	0.326245
LR_11_MSZ-1 - 57	rim		35.15	5660	251	2430000	470	1.684	0.039	0.0162	0.0011	0.002592	4e-05	0.023898	0.0455	0.0031	0.000746	8.2e-05	16.3	1.1	1.1	16.68	0.26	0.28	15.1	1.7	2.4	0	130	130	29300000000000	2400000000000	LR_11_MSC-1 - 57	0.002592	16.68	0.28	17.0085	0.294757	17.0886	0.295012
LR_11_MSZ-1 - 58	rim	?young	15.999	8530	389	3470000	671	1.713	0.015	0.016	0.0013	0.002495	4.9e-05	-0.6381	0.0458	0.0039	0.00082	6.9e-05	16.1	1.3	1.3	16.06	0.31	0.33	16.6	1.4	2.3	10	180	180	40800000000000	1600000000000	LR_11_MSC-1 - 58	0.002495	16.06	0.33	16.3406	0.341584	16.417	0.341821
LR_11_MSZ-1 - 59	inner part		11.393	6650	326	2752000	532	2.29	0.12	0.018	0.0017	0.002676	4.7e-05	0.056717	0.0496	0.0046	0.00091	0.00015	18.1	1.7	1.7	17.23	0.3	0.32	18.5	2.9	3.6	170	190	190	32600000000000	1100000000000	LR_11_MSC-1 - 59	0.002676	17.23	0.32	17.5569	0.334135	17.627	0.334346
LR_11_MSZ-1 - 60	rim		10.181	3110	127	1165000	225.2	2.139	0.03	0.0157	0.0024	0.00267	0.00013	-0.2083	0.043	0.0077	0.00069	0.00033	15.8	2.4	2.4	17.21	0.84	0.84	13.9	6.6	6.8	-110	290	290	14030000000000	810000000000	LR_11_MSC-1 - 60	0.00267	17.21	0.84	17.6346	0.865895	17.6855	0.865977
LR_11_MSZ-1 - 61	rim	disc.	36.12	5300	298	2230000	432	1.824	0.014	0.0205	0.0017	0.002601	4.9e-05	0.13816	0.0571	0.0046	0.00097	0.00011	20.6	1.7	1.7	16.74	0.31	0.33	19.6	2.2	3.1	480	170	170	26900000000000	1600000000000	LR_11_MSC-1 - 61	0.002601	16.74	0.33	17.0793	0.345073	17.1573	0.345289
LR_11_MSZ-1 - 62	rim	?young	34.423	17900	792	7810000	1510	1.972	0.026	0.016	0.00063	0.002531	2.7e-05	-0.073112	0.0464	0.002	0.000816	6.5e-05	16.11	0.63	0.66	16.29	0.17	0.2	16.5	1.3	2.3	47	87	87	90400000000000	6900000000000	LR_11_MSC-1 - 62	0.002531	16.29	0.2	16.4882	0.207501	16.5662	0.20788
LR_11_MSZ-1 - 63	rim	?young	35.15	9210	403	4050000	784	1.641	0.03	0.01558	0.00076	0.002527	3.7e-05	-0.13124	0.0441	0.0021	0.00083	7.4e-05	15.7	0.76	0.78	16.27	0.24	0.26	16.8	1.5	2.4	-58	88	88	47600000000000	3100000000000	LR_11_MSC-1 - 63	0.002527	16.27	0.26	16.5374	0.271001	16.6096	0.271292
LR_11_MSZ-1 - 64	rim of 65		35.15	22010	1015	8980000	1738	3.846	0.029	0.01727	0.00054	0.002676	2.5e-05	0.21197	0.0469	0.0013	0.000828	7.1e-05	17.38	0.54	0.57	17.23	0.16	0.19	16.7	1.4	2.4	49	60	60	104200000000000	3600000000000	LR_11_MSC-1 - 64	0.002676	17.23	0.19	17.4234	0.197322	17.4936	0.197678
LR_11_MSZ-1 - 65	rim of 64		34.908	6020	266	2570000	498	2.152	0.088	0.0171	0.0013	0.002639	4.8e-05	0.10981	0.0459	0.0033	0.000919	9e-05	17.2	1.3	1.3	16.99	0.31	0.33	18.6	1.8	2.8	60	140	140	30200000000000	3100000000000	LR_11_MSC-1 - 65	0.002639	16.99	0.33	17.3211	0.34444	17.3933	0.34465
LR_11_NEMTI - 1	rim		24.726	7630	356	3360000	649	1.844	0.032	0.0164	0.0012	0.002607	3.8e-05	0.0045515	0.0457	0.0032	0.00091	0.00011	16.5	1.2	1.2	16.78	0.24	0.27	18.3	2.2	3	10	130	130	40200000000000	4400000000000	LR_11_NEMTI - 1	0.002607	16.78	0.27	17.0748	0.282549	17.1514	0.282811
LR_11_NEMTI - 2	rim	disc.	34.908	18300	4600	5800000	1130	4.49	0.9	1.05	0.46	0.0156	0.006	0.86054	0.414	0.073	0.24	0.14	570	180	180	99	37	37	2100	1300	1300	3320	510	510	91000000000000	19000000000000	LR_11_NEMTI - 2	0.0156	99	37	100.2	37.4495	101.06	37.4495
LR_11_NEMTI - 3	rim		28.847	7910	379	3130000	607	1.162	0.022	0.0176	0.001	0.002637	4.1e-05	-0.1258	0.0489	0.0029	0.000869	6.7e-05	17.92	0.99	1	16.98	0.26	0.28	17.6	1.3	2.4	140	120	120	41400000000000	1700000000000	LR_11_NEMTI - 3	0.002637	16.98	0.28	17.275	0.292415	17.3443	0.292662
LR_11_NEMTI - 4	inner part	disc.	35.15	8460	670	3200000	620	1.947	0.09	0.034	0.0089	0.002718	6.7e-05	0.88045	0.082	0.016	0.00168	0.00038	33.6	8.4	8.4	17.5	0.43	0.44	33.9	7.6	8.5	970	310	310	41400000000000	2400000000000	LR_11_NEMTI - 4	0.002718	17.5	0.44	17.804	0.452785	17.8741	0.452936
LR_11_NEMTI - 5	rim		28.847	14890	710	6190000	1201	1.877	0.051	0.01691	0.00062	0.002591	2.9e-05	-0.024068	0.0472	0.0018	0.000968	5.3e-05	17.02	0.62	0.65	16.68	0.19	0.22	19.6	1.1	2.4	70	77	77	73900000000000	6100000000000	LR_11_NEMTI - 5	0.002591	16.68	0.22	16.9053	0.228783	16.979	0.229111
LR_11_NEMTI - 6	rim		10.424	8480	399	3840000	744	1.654	0.038	0.0174	0.0017	0.002666	7.3e-05	0.18427	0.0474	0.0047	0.00097	0.00015	17.5	1.7	1.7	17.16	0.47	0.48	19.5	3	3.7	80	200	200	47700000000000	2000000000000	LR_11_NEMTI - 6	0.002666	17.16	0.48	17.4418	0.491965	17.5177	0.492109
LR_11_NEMTI - 7	rim	disc.	31.271	4220	314	1720000	333.7	2.488	0.03	0.0273	0.0081	0.002621	6.2e-05	0.044234	0.069	0.015	0.00102	0.00015	27	7.7	7.7	16.87	0.4	0.41	20.7	2.9	3.8	560	280	280	20530000000000	850000000000	LR_11_NEMTI - 7	0.002621	16.87	0.41	17.2427	0.42719	17.3192	0.427361
LR_11_NEMTI - 8	rim		34.908	11360	506	4730000	917	2.343	0.024	0.01653	0.00068	0.002654	3.2e-05	-0.16399	0.0454	0.002	0.000875	6.8e-05	16.64	0.68	0.71	17.08	0.2	0.23	17.7	1.4	2.4	-14	88	88	55600000000000	3800000000000	LR_11_NEMTI - 8	0.002654	17.08	0.23	17.343	0.240937	17.4218	0.241234
LR_11_NEMTI - 9	rim		34.908	8320	381	3500000	680	2.425	0.055	0.01663	0.00065	0.0026	3.5e-05	-0.24168	0.0456	0.0021	0.00086	0.0001	16.74	0.65	0.67	16.74	0.23	0.25	17.4	2	2.8	5	86	86	41400000000000	2800000000000	LR_11_NEMTI - 9	0.0026	16.74	0.25	17.0308	0.262539	17.1023	0.262823
LR_11_NEMTI - 10	rim		35.15	5320	253	2229000	433	1.887	0.015	0.0171	0.0011	0.002643	3.9e-05	0.079785	0.0471	0.0028	0.000868	8.9e-05	17.3	1.1	1.1	17.02	0.25	0.27	17.5	1.8	2.7	70	110	110	26900000000000	1100000000000	LR_11_NEMTI - 10	0.002643	17.02	0.27	17.365	0.285997	17.4328	0.286249
LR_11_NEMTI - 11	rim of 12		35.15	8550	385	3620000	702	1.563	0.048	0.01673	0.00087	0.002634	2.9e-05	-0.03567	0.046	0.0024	0.000848	8.6e-05	16.84	0.86	0.88	16.96	0.19	0.22	17.1	1.7	2.6	20	97	97	45000000000000	4000000000000	LR_11_NEMTI - 11	0.002634	16.96	0.22	17.2451	0.232651	17.3152	0.232963
LR_11_NEMTI - 12	core of 11		34.908	6750	334	2730000	530	1.774	0.062	0.0183	0.0011	0.00275	3.3e-05	0.36825	0.0484	0.0028	0.00107	0.00012	18.4	1.1	1.1	17.71	0.21	0.24	21.7	2.4	3.4	120	110	110	34200000000000	3100000000000	LR_11_NEMTI - 12	0.00275	17.71	0.24	18.0403	0.255361	18.106	0.255621
LR_11_NEMTI - 13	rim		27.635	5360	253	2200000	428	1.478	0.049	0.0171	0.0013	0.002575	5.4e-05	0.33545	0.0481	0.0036	0.00085	0.00011	17.2	1.3	1.3	16.58	0.35	0.36	17.2	2.3	3	150	150	150	27000000000000	1700000000000	LR_11_NEMTI - 13	0.002575	16.58	0.36	16.9156	0.374825	16.9863	0.375028
LR_11_NEMTI - 14	rim		17.696	6840	318	2880000	560	1.395	0.064	0.0168	0.0015	0.002601	5.2e-05	0.1538	0.0468	0.0041	0.00082	8.1e-05	16.9	1.5	1.5	16.75	0.34	0.35	16.6	1.6	2.5	60	170	170	36000000000000	1700000000000	LR_11_NEMTI - 14	0.002601	16.75	0.35	17.0567	0.362933	17.1245	0.363138
LR_11_NEMTI - 15	inner part		35.15	10490	464	4260000	828	1.664	0.071	0.0164	0.0008	0.002637	3.1e-05	0.30308	0.0449	0.0022	0.000847	6.9e-05	16.51	0.8	0.82	16.97	0.2	0.23	17.1	1.4	2.4	-24	92	92	53400000000000	2800000000000	LR_11_NEMTI - 15	0.002637	16.97	0.23	17.2359	0.241142	17.3154	0.241442
LR_11_NEMTI - 16	rim		12.121	5990	255	2660000	517	2.179	0.04	0.0159	0.0022	0.00266	6.3e-05	0.4502	0.042	0.0051	0.00081	0.00014	16	2.2	2.2	17.12	0.4	0.42	16.4	2.9	3.5	-80	220	220	31900000000000	1700000000000	LR_11_NEMTI - 16	0.00266	17.12	0.42	17.4473	0.434217	17.5246	0.434381
LR_11_NEMTI - 17	rim	disc.	34.908	7430	614	2980000	579	1.807	0.018	0.0324	0.0033	0.002773	4.1e-05	0.76884	0.0856	0.0082	0.00149	0.00012	32.3	3.3	3.3	17.85	0.27	0.29	30.1	2.4	4.1	1220	180	180	38000000000000	2000000000000	LR_11_NEMTI - 17	0.002773	17.85	0.29	18.1703	0.303766	18.244	0.303982
LR_11_NEMTI - 18	rim		35.15	15240	691	6360000	1237	0.771	0.019	0.01683	0.0006	0.002649	2.8e-05	0.31021	0.0463	0.0017	0.000895	3.5e-05	16.94	0.6	0.63	17.06	0.18	0.21	18.07	0.71	2.2	9	74	74	89800000000000	6300000000000	LR_11_NEMTI - 18	0.002649	17.06	0.21	17.2683	0.217892	17.3349	0.218221
LR_11_NEMTI - 19	rim		30.544	8560	406	3590000	698	1.603	0.016	0.01704	0.00097	0.002585	3.7e-05	-0.058726	0.0483	0.0028	0.000869	7e-05	17.15	0.97	0.99	16.64	0.24	0.26	17.6	1.4	2.4	130	120	120	43100000000000	2100000000000	LR_11_NEMTI - 19	0.002585	16.64	0.26	16.9246	0.272019	16.9997	0.272296
LR_11_NEMTI - 20	rim		35.15	5930	277	2480000	482.5	1.196	0.011	0.0167	0.0011	0.002562	3.2e-05	-0.12521	0.0472	0.0032	0.000856	7.2e-05	16.8	1.1	1.1	16.5	0.21	0.23	17.3	1.5	2.4	70	130	130	31540000000000	600000000000	LR_11_NEMTI - 20	0.002562	16.5	0.23	16.8167	0.244835	16.8838	0.245149
LR_11_NEMTI - 21	rim		35.15	8290	384	3530000	687	1.113	0.011	0.01644	0.0007	0.002602	3.4e-05	0.25266	0.0468	0.0021	0.000828	6.3e-05	16.68	0.73	0.76	16.75	0.22	0.25	16.7	1.3	2.3	51	86	86	45400000000000	2400000000000	LR_11_NEMTI - 21	0.002602	16.75	0.25	17.0306	0.261858	17.105	0.262142
LR_11_NEMTI - 22	rim	disc.	35.15	10880	642	4620000	900	1.38	0.048	0.0212	0.0011	0.002581	2.8e-05	0.23576	0.0593	0.003	0.000984	7.2e-05	21.2	1.1	1.1	16.62	0.18	0.21	19.9	1.4	2.7	590	110	110	57800000000000	4600000000000	LR_11_NEMTI - 22	0.002581	16.62	0.21	16.8716	0.220599	16.941	0.220942
LR_11_NEMTI - 23	rim		35.15	12090	568	5010000	976	3.04	0.036	0.01728	0.00078	0.002657	2e-05	-0.14827	0.047	0.0022	0.000909	8.6e-05	17.39	0.78	0.8	17.1	0.13	0.17	18.4	1.7	2.7	64	92	92	58700000000000	2100000000000	LR_11_NEMTI - 23	0.002657	17.1	0.17	17.3571	0.182043	17.4352	0.182435
LR_11_NEMTI - 24	rim		35.15	13420	611	5630000	1097	1.479	0.062	0.01682	0.00067	0.002639	2.2e-05	0.18897	0.0466	0.0018	0.000867	4.8e-05	16.94	0.67	0.69	16.99	0.14	0.18	17.51	0.97	2.2	37	80	80	71000000000000	4900000000000	LR_11_NEMTI - 24	0.002639	16.99	0.18	17.224	0.190055	17.2963	0.190436
LR_11_NEMTI - 25	rim of 26		16.969	11700	551	5000000	973	1.612	0.038	0.0178	0.0012	0.002741	3e-05	0.063615	0.0481	0.0036	0.000953	8e-05	17.9	1.2	1.3	17.64	0.19	0.22	19.3	1.6	2.7	110	150	150	64000000000000	2600000000000	LR_11_NEMTI - 25	0.002741	17.64	0.22	17.8951	0.230519	17.9732	0.23081
LR_11_NEMTI - 26	core of 25		19.636	87000	4060	36200000	7050	0.564	0.014	0.01753	0.00048	0.002687	2.6e-05	0.20814	0.0467	0.0013	0.000897	2.4e-05	17.64	0.48	0.51	17.3	0.17	0.2	18.13	0.48	2.1	44	58	58	568000000000000	44000000000000	LR_11_NEMTI - 26	0.002687	17.3	0.2	17.3022	0.201062	17.3734	0.201408
LR_11_NEMTI - 27	rim		35.15	8160	389	3284000	640	2.677	0.085	0.0173	0.00097	0.002675	3.5e-05	-0.12291	0.0474	0.0029	0.000918	9.6e-05	17.41	0.97	0.99	17.22	0.22	0.25	18.5	1.9	2.9	80	120	120	39700000000000	1100000000000	LR_11_NEMTI - 27	0.002675	17.22	0.25	17.524	0.263343	17.5977	0.26361
LR_11_NEMTI - 28	inner part	disc.	45.816	7160	1160	2180000	424	2.93	0.57	0.182	0.092	0.0038	0.00064	0.96806	0.218	0.064	0.033	0.02	140	62	62	24.4	4.1	4.1	510	320	320	1890	510	510	41300000000000	2900000000000	LR_11_NEMTI - 28	0.0038	24.4	4.1	24.8243	4.17237	24.9471	4.17238
LR_11_NEMTI - 29	inner part		10.181	8100	338	3250000	630	2.01	0.19	0.0177	0.0016	0.00288	0.00015	0.23377	0.0459	0.0035	0.00109	0.00019	17.8	1.5	1.6	18.5	1	1	22	3.9	4.6	-30	170	170	46100000000000	9500000000000	LR_11_NEMTI - 29	0.00288	18.5	1	18.808	1.019	18.9202	1.01906
LR_11_NEMTI - 30	rim		32.241	3570	158	1510000	294	1.791	0.015	0.0162	0.0011	0.002636	4.3e-05	0.11476	0.0448	0.0033	0.00088	0.00012	16.3	1.1	1.1	16.97	0.27	0.3	17.9	2.4	3.1	-30	130	130	18500000000000	1200000000000	LR_11_NEMTI - 30	0.002636	16.97	0.3	17.3568	0.318688	17.4297	0.318915
LR_11_NEMTI - 31	rim		15.03	3040	126	1290000	251	1.665	0.066	0.0169	0.0031	0.002765	9.8e-05	-0.090298	0.0434	0.0089	0.00094	0.0002	17	3.1	3.1	17.8	0.63	0.64	19	4	4.6	-30	350	350	16800000000000	1800000000000	LR_11_NEMTI - 31	0.002765	17.8	0.64	18.2174	0.66156	18.2895	0.66166
LR_11_NEMTI - 32	rim		34.908	3830	179	1630000	318	2.06	0.02	0.0166	0.0015	0.002591	4.8e-05	-0.079164	0.0464	0.0043	0.00097	0.00013	16.7	1.5	1.5	16.68	0.31	0.33	19.5	2.5	3.4	80	180	180	19100000000000	1200000000000	LR_11_NEMTI - 32	0.002591	16.68	0.33	17.0566	0.347706	17.1302	0.347922
LR_11_NEMTI - 33	rim		35.15	12230	551	5250000	1024	1.631	0.033	0.01623	0.00079	0.002598	2.8e-05	-0.14736	0.0453	0.0023	0.000901	6.1e-05	16.34	0.79	0.81	16.72	0.18	0.21	18.2	1.2	2.4	9	99	99	64000000000000	3900000000000	LR_11_NEMTI - 33	0.002598	16.72	0.21	16.9618	0.219945	17.0406	0.220284
LR_11_NEMTI - 34	rim		24.726	17960	825	7410000	1446	2.581	0.05	0.01729	0.00059	0.002755	3.2e-05	0.15045	0.0457	0.0016	0.000949	6.5e-05	17.4	0.59	0.62	17.74	0.2	0.24	19.2	1.3	2.5	4	68	68	91300000000000	3900000000000	LR_11_NEMTI - 34	0.002755	17.74	0.24	17.9547	0.247877	18.0227	0.248145
LR_11_NEMTI - 35	rim		19.151	11040	538	4790000	935	2.168	0.033	0.01805	0.00092	0.002661	4.1e-05	0.21073	0.0497	0.0029	0.00087	0.00011	18.16	0.92	0.94	17.13	0.26	0.28	17.6	2.2	2.9	170	120	120	58000000000000	3900000000000	LR_11_NEMTI - 35	0.002661	17.13	0.28	17.389	0.290168	17.4627	0.290414
LR_11_NEMTI - 36	rim		35.15	8790	425	3650000	712	1.713	0.062	0.01771	0.00085	0.002661	3.3e-05	0.13921	0.0486	0.0025	0.000957	7.3e-05	17.82	0.84	0.87	17.13	0.21	0.24	19.3	1.5	2.6	130	100	100	45900000000000	4600000000000	LR_11_NEMTI - 36	0.002661	17.13	0.24	17.4157	0.252275	17.4895	0.252557
LR_11_NEMTI - 37	rim		12.121	5560	267	2220000	434	1.48	0.021	0.0169	0.0016	0.002558	5.7e-05	0.078483	0.0484	0.0047	0.00098	0.00018	17	1.6	1.6	16.47	0.37	0.38	19.8	3.6	4.2	130	190	190	26900000000000	1500000000000	LR_11_NEMTI - 37	0.002558	16.47	0.38	16.8038	0.394773	16.8752	0.394968
LR_11_NEMTI - 38	rim		23.999	11810	565	5170000	1009	1.407	0.018	0.01714	0.00098	0.002613	3.2e-05	0.060236	0.0478	0.0028	0.000852	7e-05	17.25	0.98	1	16.82	0.2	0.23	17.2	1.4	2.4	100	120	120	64700000000000	3300000000000	LR_11_NEMTI - 38	0.002613	16.82	0.23	17.062	0.23965	17.1372	0.239958
LR_11_NEMTI - 39	core		21.817	3020	138	1210000	237	1.491	0.016	0.0164	0.002	0.002675	8.8e-05	-0.058362	0.0424	0.0052	0.00106	0.00017	16.5	2	2	17.22	0.56	0.57	21.4	3.4	4.2	-80	220	220	15300000000000	2700000000000	LR_11_NEMTI - 39	0.002675	17.22	0.57	17.6347	0.590977	17.7083	0.591096
LR_11_NEMTI - 40	rimof 42		24.484	4870	224	1970000	386	1.2	0.018	0.01716	0.00097	0.002621	4.3e-05	-0.096716	0.0474	0.003	0.00088	0.00012	17.27	0.97	0.99	16.88	0.28	0.3	17.8	2.5	3.2	80	120	120	25300000000000	1500000000000	LR_11_NEMTI - 40	0.002621	16.88	0.3	17.2291	0.315925	17.2954	0.316157
LR_11_NEMTI - 41	inner part of 46		14.302	11230	549	4760000	930	0.868	0.04	0.018	0.0011	0.002652	4.3e-05	-0.011344	0.0495	0.0034	0.000952	8.1e-05	18.1	1.1	1.1	17.07	0.27	0.3	19.2	1.6	2.7	170	140	140	67400000000000	4400000000000	LR_11_NEMTI - 41	0.002652	17.07	0.3	17.311	0.309097	17.3869	0.309329
LR_11_NEMTI - 42	core of 40	disc.	6.5452	4430	283	1981000	387.2	1.513	0.031	0.024	0.0048	0.002689	8e-05	0.26315	0.0599	0.0092	0.00088	0.00019	24	4.8	4.8	17.31	0.51	0.52	17.9	3.9	4.4	660	370	370	25340000000000	670000000000	LR_11_NEMTI - 42	0.002689	17.31	0.52	17.6678	0.5367	17.7414	0.53683
LR_11_NEMTI - 43	inner part		17.696	9190	427	3870000	756	2.14	0.13	0.0168	0.0011	0.002527	4e-05	-0.12348	0.0485	0.0033	0.000843	9.8e-05	16.9	1.1	1.1	16.27	0.26	0.28	17	2	2.8	130	140	140	45100000000000	4400000000000	LR_11_NEMTI - 43	0.002527	16.27	0.28	16.5433	0.29122	16.6155	0.291491
LR_11_NEMTI - 44	rim of 49		34.908	5120	242	2210000	433	2.648	0.053	0.0167	0.001	0.002598	4.1e-05	-0.094686	0.0466	0.0031	0.00071	0.00011	16.8	1	1	16.73	0.26	0.29	14.4	2.2	2.7	50	120	120	25600000000000	1900000000000	LR_11_NEMTI - 44	0.002598	16.73	0.29	17.0747	0.305772	17.1432	0.306016
LR_11_NEMTI - 45	inner part		29.817	9910	468	4178000	817	3.138	0.047	0.01699	0.00087	0.002586	3.8e-05	0.27998	0.0483	0.0023	0.00084	0.00011	17.1	0.87	0.89	16.65	0.24	0.27	16.9	2.2	2.9	117	96	96	47300000000000	1400000000000	LR_11_NEMTI - 45	0.002586	16.65	0.27	16.9244	0.281269	16.9959	0.281537
LR_11_NEMTI - 46	rim of 41		17.211	6410	317	2860000	559	1.845	0.026	0.0178	0.0011	0.002615	5.9e-05	0.36255	0.0499	0.0031	0.00087	0.00012	17.9	1.1	1.1	16.84	0.38	0.4	17.6	2.4	3.1	180	130	130	34500000000000	1500000000000	LR_11_NEMTI - 46	0.002615	16.84	0.4	17.1531	0.413394	17.221	0.413572
LR_11_NEMTI - 47	inner part		34.908	3200	164	1350000	264	1.72	0.035	0.018	0.0014	0.002597	5.6e-05	-0.21899	0.0503	0.0046	0.00099	0.00014	18.1	1.4	1.4	16.72	0.36	0.37	20	2.9	3.7	180	180	180	16000000000000	1100000000000	LR_11_NEMTI - 47	0.002597	16.72	0.37	17.1176	0.388994	17.1897	0.389186
LR_11_NEMTI - 48	rim	disc.	35.047	10360	730	4070000	795	1.078	0.045	0.0258	0.0028	0.002726	3.7e-05	0.66517	0.0685	0.0067	0.001114	8.3e-05	25.9	2.8	2.8	17.55	0.24	0.27	22.5	1.7	3	800	210	210	58600000000000	5200000000000	LR_11_NEMTI - 48	0.002726	17.55	0.27	17.8141	0.280462	17.8857	0.280704
LR_11_NEMTI - 49	core of 44		34.908	7370	338	3210000	628	1.761	0.024	0.0167	0.001	0.002607	3.4e-05	0.018188	0.0467	0.0029	0.000885	8.8e-05	16.8	1	1	16.78	0.22	0.24	17.9	1.8	2.7	50	120	120	39100000000000	3200000000000	LR_11_NEMTI - 49	0.002607	16.78	0.24	17.0779	0.253185	17.1545	0.253478
LR_11_NEMTI - 50	inner part		24.484	7620	344	3250000	637	1.547	0.094	0.0174	0.0013	0.002692	4.5e-05	0.34538	0.0467	0.0033	0.00107	0.0001	17.5	1.3	1.4	17.33	0.29	0.31	21.6	2.1	3.2	80	140	140	41800000000000	4700000000000	LR_11_NEMTI - 50	0.002692	17.33	0.31	17.6299	0.322434	17.7029	0.322649
LR_11_NEMTI - 51	rim of 52		35.15	6240	287	2650000	519	1.186	0.016	0.0167	0.0011	0.002578	3.6e-05	0.13064	0.047	0.0031	0.000815	6.8e-05	16.8	1.1	1.1	16.59	0.23	0.26	16.5	1.4	2.3	70	120	120	33900000000000	1400000000000	LR_11_NEMTI - 51	0.002578	16.59	0.26	16.9004	0.273782	16.9806	0.274059
LR_11_NEMTI - 52	core of 51	disc.	35.041	18500	1110	7900000	1550	1.393	0.052	0.0239	0.0019	0.002593	3.5e-05	-0.27192	0.0672	0.0057	0.001013	5.6e-05	24	1.9	1.9	16.69	0.23	0.25	20.5	1.1	2.6	770	170	170	102000000000000	17000000000000	LR_11_NEMTI - 52	0.002593	16.69	0.25	16.8797	0.256644	16.9564	0.256936
LR_11_NEMTI - 53	core		35.15	24100	1130	10600000	2080	0.934	0.056	0.01678	0.00052	0.002583	2.4e-05	0.12742	0.0477	0.0015	0.000862	3.1e-05	16.9	0.51	0.55	16.63	0.16	0.19	17.42	0.62	2.1	89	63	63	147000000000000	27000000000000	LR_11_NEMTI - 53	0.002583	16.63	0.19	16.7789	0.195069	16.8513	0.195455
LR_11_NEMTI - 54	inner part		15.03	6240	296	2680000	527	1.432	0.096	0.0165	0.0014	0.00254	6.1e-05	0.11756	0.0485	0.0043	0.000855	9e-05	17	1.5	1.5	16.35	0.39	0.41	17.3	1.8	2.7	130	170	170	33000000000000	2900000000000	LR_11_NEMTI - 54	0.00254	16.35	0.41	16.6589	0.423397	16.7347	0.423581
LR_11_NEMTI - 55	rim		32.241	7460	341	3017000	592	2.231	0.037	0.01656	0.00089	0.002673	2.8e-05	-0.044798	0.045	0.0024	0.00095	0.00011	16.67	0.89	0.9	17.21	0.18	0.21	19.2	2.2	3.1	-22	99	99	36690000000000	990000000000	LR_11_NEMTI - 55	0.002673	17.21	0.21	17.5229	0.224959	17.5937	0.225273
LR_11_NEMTI - 56	inner part		27.878	5980	259	2550000	500	3.191	0.066	0.016	0.0011	0.002625	4.1e-05	0.11751	0.0438	0.0033	0.00084	0.00012	16.1	1.1	1.1	16.9	0.26	0.29	16.9	2.3	3	-70	130	130	30000000000000	1900000000000	LR_11_NEMTI - 56	0.002625	16.9	0.29	17.2301	0.304692	17.3023	0.304932
LR_11_NEMTI - 57	rim of 59		34.908	27400	1290	10930000	2150	1.201	0.033	0.01777	0.00049	0.002728	3.1e-05	0.20396	0.047	0.0014	0.000944	4.3e-05	17.89	0.49	0.53	17.56	0.2	0.23	19.06	0.88	2.3	62	58	58	148800000000000	5900000000000	LR_11_NEMTI - 57	0.002728	17.56	0.23	17.7158	0.235107	17.7904	0.235395
LR_11_NEMTI - 58	rim		35.15	5390	237	2310000	454	2.071	0.056	0.0162	0.0011	0.00257	4.7e-05	-0.037791	0.0457	0.0033	0.00081	0.00011	16.3	1.1	1.1	16.55	0.3	0.32	16.3	2.3	2.9	10	130	130	27600000000000	2200000000000	LR_11_NEMTI - 58	0.00257	16.55	0.32	16.8826	0.33474	16.9511	0.334968
LR_11_NEMTI - 59	core of 57		36.604	7430	333	2850000	559	1.53	0.027	0.0183	0.0011	0.002937	3.9e-05	0.20809	0.0458	0.0026	0.000968	9.8e-05	18.7	1.1	1.1	18.9	0.25	0.28	19.6	2	3	0	110	110	40000000000000	3600000000000	LR_11_NEMTI - 59	0.002937	18.9	0.28	19.2327	0.294488	19.3106	0.294686
LR_11_NEMTI - 60	rim of 61		35.15	6740	311	2810000	552	2.62	0.032	0.01668	0.00086	0.00264	3.4e-05	-0.025255	0.0457	0.0026	0.000828	9.4e-05	16.79	0.86	0.88	16.99	0.22	0.24	16.7	1.9	2.7	10	110	110	33700000000000	1400000000000	LR_11_NEMTI - 60	0.00264	16.99	0.24	17.3086	0.254635	17.3873	0.254919
LR_11_NEMTI - 61	core of 60		5.8179	20270	1012	9540000	1874	1.041	0.042	0.0179	0.0019	0.002574	8.7e-05	0.24319	0.0506	0.0051	0.001	0.00011	18	1.9	1.9	16.57	0.56	0.57	20.1	2.2	3.1	210	210	210	124600000000000	5800000000000	LR_11_NEMTI - 61	0.002574	16.57	0.57	16.7364	0.577071	16.8109	0.577203
LR_11_NEMTI - 62	rim of 63		34.908	6070	284	2550000	501	1.62	0.044	0.017	0.001	0.002613	4.2e-05	-0.18763	0.0472	0.0028	0.000878	8.6e-05	17.1	1	1	16.82	0.27	0.29	17.7	1.7	2.7	60	110	110	31300000000000	1300000000000	LR_11_NEMTI - 62	0.002613	16.82	0.29	17.1438	0.304278	17.2188	0.304521
LR_11_NEMTI - 63	core of 62		28.847	7070	328	3120000	613	2.308	0.016	0.0169	0.00089	0.002576	4e-05	-0.012471	0.0478	0.0026	0.000823	9e-05	17.01	0.89	0.91	16.58	0.26	0.28	16.6	1.8	2.6	80	110	110	36800000000000	2500000000000	LR_11_NEMTI - 63	0.002576	16.58	0.28	16.8811	0.292918	16.9584	0.293177
LR_11_NEMTI - 64	rim of 65		35.15	3020	142	1310000	257	1.92	0.032	0.0177	0.0017	0.002567	5.1e-05	-0.018916	0.049	0.0052	0.00091	0.00012	17.8	1.7	1.7	16.53	0.32	0.34	18.4	2.5	3.2	150	200	200	15700000000000	1600000000000	LR_11_NEMTI - 64	0.002567	16.53	0.34	16.9252	0.359065	16.9943	0.359278
LR_11_NEMTI - 65	core of 64		30.302	19300	873	7530000	1480	2.279	0.035	0.01746	0.00077	0.002705	7.7e-05	0.48889	0.0469	0.0017	0.000864	7.4e-05	17.57	0.77	0.79	17.42	0.49	0.51	17.5	1.5	2.5	57	71	71	95100000000000	4500000000000	LR_11_NEMTI - 65	0.002705	17.42	0.51	17.6261	0.518221	17.6927	0.518353
LR_15_TAR-Gh-1 - 1	rim	disc.	7.9997	4300	234	2010000	410	1.81	0.03	0.0176	0.0028	0.002358	3.2e-05	0.35969	0.0537	0.0083	0.00087	0.0002	17.7	2.8	2.8	15.18	0.21	0.23	17.6	4.1	4.6	320	330	330	22810000000000	930000000000	LR_15_TAR-Gh-1 - 1	0.002358	15.18	0.23	15.5045	0.245781	15.58	0.24615
LR_15_TAR-Gh-1 - 2	inner part	?young	35.15	6110	274	3150000	641	1.586	0.097	0.01421	0.00082	0.002176	3.9e-05	0.039382	0.0472	0.0027	0.000726	6.8e-05	14.32	0.82	0.84	14.01	0.25	0.27	14.7	1.4	2.1	70	110	110	34600000000000	5200000000000	LR_15_TAR-Gh-1 - 2	0.002176	14.01	0.27	14.2702	0.281088	14.3451	0.281466
LR_15_TAR-Gh-1 - 3	rim		23.272	4870	239	2378000	485	1.607	0.025	0.0159	0.0015	0.002335	4.9e-05	0.051006	0.0497	0.0046	0.000705	9.8e-05	16	1.5	1.5	15.03	0.31	0.33	14.2	2	2.6	170	180	180	27220000000000	880000000000	LR_15_TAR-Gh-1 - 3	0.002335	15.03	0.33	15.3334	0.343386	15.411	0.343655
LR_15_TAR-Gh-1 - 4	rim of 5		30.302	6620	306	3150000	642	1.41	0.12	0.01437	0.00091	0.002243	3.8e-05	-0.013603	0.0472	0.003	0.000717	5.6e-05	14.49	0.91	0.93	14.44	0.25	0.26	14.5	1.1	2	70	130	130	36300000000000	1800000000000	LR_15_TAR-Gh-1 - 4	0.002243	14.44	0.26	14.7036	0.271216	14.7794	0.271585
LR_15_TAR-Gh-1 - 5	rim of 4		35.15	2182	102	1050000	214.2	2.078	0.018	0.0146	0.0013	0.002308	3.9e-05	-0.15209	0.0458	0.0043	0.00064	0.00013	14.7	1.3	1.3	14.86	0.25	0.27	12.9	2.6	3	40	170	170	11590000000000	580000000000	LR_15_TAR-Gh-1 - 5	0.002308	14.86	0.27	15.2459	0.290028	15.3197	0.290354
LR_15_TAR-Gh-1 - 6	rim		16.484	3041	119	1518000	310	2.173	0.027	0.0126	0.0025	0.002322	5e-05	-0.0039087	0.0403	0.008	0.00076	0.00015	12.7	2.5	2.5	14.95	0.32	0.34	15.4	3	3.5	-230	290	290	16900000000000	610000000000	LR_15_TAR-Gh-1 - 6	0.002322	14.95	0.34	15.3	0.356567	15.3738	0.356829
LR_15_TAR-Gh-1 - 7	rim		15.03	5560	240	2740000	560	1.876	0.032	0.0141	0.0014	0.002398	4.3e-05	-0.21342	0.0427	0.0043	0.00089	0.00011	14.2	1.4	1.4	15.44	0.28	0.3	18	2.3	3.1	-110	170	170	31800000000000	3100000000000	LR_15_TAR-Gh-1 - 7	0.002398	15.44	0.3	15.7355	0.312773	15.8082	0.313053
LR_15_TAR-Gh-1 - 8	rim		35.15	2870	133	1383000	282	2.431	0.018	0.015	0.0014	0.002302	4.4e-05	-0.19402	0.0469	0.0047	0.00076	0.00012	15.1	1.4	1.4	14.82	0.28	0.3	15.4	2.5	3	40	180	180	15160000000000	970000000000	LR_15_TAR-Gh-1 - 8	0.002302	14.82	0.3	15.1778	0.317395	15.2531	0.317694
LR_15_TAR-Gh-1 - 9	rim		27.878	2918	127	1335000	272.5	1.984	0.035	0.0145	0.0017	0.002348	5.6e-05	0.012471	0.044	0.0053	0.0009	0.00015	14.6	1.7	1.7	15.12	0.36	0.37	18.3	3	3.7	-40	210	210	15120000000000	440000000000	LR_15_TAR-Gh-1 - 9	0.002348	15.12	0.37	15.4854	0.387564	15.5563	0.3878
LR_15_TAR-Gh-1 - 10	rim of 13		21.817	3698	167	1863000	380.6	1.987	0.03	0.0142	0.0014	0.002292	4.8e-05	0.10657	0.0451	0.0044	0.0008	0.00012	14.3	1.4	1.4	14.76	0.31	0.32	16.2	2.5	3.1	-20	180	180	20260000000000	580000000000	LR_15_TAR-Gh-1 - 10	0.002292	14.76	0.32	15.0874	0.335117	15.1582	0.335403
LR_15_TAR-Gh-1 - 11	rim		35.15	6320	304	3140000	641	1.342	0.022	0.015	0.00077	0.002244	3.5e-05	0.21074	0.0489	0.0026	0.000703	5.2e-05	15.11	0.77	0.79	14.45	0.22	0.24	14.2	1.1	1.9	160	110	110	35600000000000	2900000000000	LR_15_TAR-Gh-1 - 11	0.002244	14.45	0.24	14.7156	0.251512	14.7879	0.251909
LR_15_TAR-Gh-1 - 12	rim		34.908	6750	312	3380000	691	1.8	0.1	0.01438	0.00098	0.002244	2.3e-05	-0.24083	0.046	0.0034	0.000757	9e-05	14.49	0.98	1	14.45	0.15	0.17	15.3	1.8	2.5	20	140	140	37600000000000	5300000000000	LR_15_TAR-Gh-1 - 12	0.002244	14.45	0.17	14.7103	0.182585	14.7826	0.183132
LR_15_TAR-Gh-1 - 13	core of 10		6.0603	4748	229	2503000	511	1.412	0.032	0.0154	0.0034	0.0023	5.8e-05	0.3437	0.049	0.01	0.0006	0.00017	15.5	3.4	3.4	14.81	0.37	0.39	12.1	3.4	3.7	130	410	410	28910000000000	660000000000	LR_15_TAR-Gh-1 - 13	0.0023	14.81	0.39	15.103	0.403043	15.1753	0.403279
LR_15_TAR-Gh-1 - 14	rim	disc.	6.3028	3380	171	1694000	346	2.01	0.1	0.0177	0.003	0.002428	8.5e-05	-0.17606	0.0533	0.0094	0.00094	0.00029	17.8	3	3	15.63	0.55	0.56	19	5.9	6.3	290	360	360	19600000000000	1600000000000	LR_15_TAR-Gh-1 - 14	0.002428	15.63	0.56	15.9802	0.577828	16.0557	0.577976
LR_15_TAR-Gh-1 - 15	rim		35.15	1770	75.6	871000	178	1.832	0.023	0.0137	0.0012	0.002255	6.3e-05	0.061643	0.0437	0.0039	0.0009	0.00015	13.8	1.2	1.2	14.52	0.41	0.42	18.2	3	3.6	-50	160	160	9610000000000	830000000000	LR_15_TAR-Gh-1 - 15	0.002255	14.52	0.42	14.9157	0.440351	14.9885	0.440576
LR_15_TAR-Gh-1 - 16	rim of 18		35.15	3090	132	1450000	297	1.986	0.033	0.014	0.0013	0.002366	4.1e-05	0.14787	0.0431	0.0039	0.00077	0.00012	14.2	1.3	1.3	15.24	0.27	0.28	15.5	2.5	3.1	-100	150	150	16600000000000	1300000000000	LR_15_TAR-Gh-1 - 16	0.002366	15.24	0.28	15.5986	0.297491	15.6652	0.297793
LR_15_TAR-Gh-1 - 17	inner part	disc.	17.696	4250	374	1422000	291	2.213	0.065	0.0362	0.0029	0.0031	0.00014	0.0055884	0.0867	0.0066	0.00199	0.00022	36.1	2.8	2.9	19.94	0.88	0.89	40.2	4.4	6.3	1340	160	160	20700000000000	2000000000000	LR_15_TAR-Gh-1 - 17	0.0031	19.94	0.89	20.3794	0.914855	20.4649	0.914912
LR_15_TAR-Gh-1 - 18	core of 16, 19	?young	34.908	5320	244	2650000	543	1.557	0.076	0.01381	0.00084	0.002199	4.5e-05	-0.0629	0.0464	0.0031	0.0007	7.9e-05	13.92	0.84	0.86	14.16	0.29	0.3	14.1	1.6	2.3	40	120	120	29500000000000	3000000000000	LR_15_TAR-Gh-1 - 18	0.002199	14.16	0.3	14.4382	0.31212	14.511	0.312454
LR_15_TAR-Gh-1 - 19	rim of 18		34.908	5530	262	2687000	551	1.86	0.022	0.01488	0.00085	0.002245	3.6e-05	0.15266	0.0482	0.0027	0.000662	6.4e-05	15	0.85	0.86	14.46	0.23	0.25	13.4	1.3	2	130	110	110	29400000000000	1300000000000	LR_15_TAR-Gh-1 - 19	0.002245	14.46	0.25	14.7444	0.262688	14.813	0.263068
LR_15_TAR-Gh-1 - 20	rim		26.181	7570	346	3334000	684	1.282	0.034	0.0161	0.00072	0.002543	4.5e-05	-0.15965	0.0469	0.0024	0.000892	8.1e-05	16.22	0.72	0.74	16.37	0.29	0.31	18	1.6	2.6	55	99	99	44000000000000	1400000000000	LR_15_TAR-Gh-1 - 20	0.002543	16.37	0.31	16.6477	0.32134	16.7228	0.321582
LR_15_TAR-Gh-1 - 21	rim		35.15	5380	256	2620000	537	2.152	0.022	0.015	0.00096	0.002245	3.3e-05	-0.16355	0.048	0.0032	0.000645	8.3e-05	15.11	0.96	0.97	14.46	0.21	0.23	13	1.7	2.2	120	130	130	28200000000000	1200000000000	LR_15_TAR-Gh-1 - 21	0.002245	14.46	0.23	14.7485	0.243242	14.817	0.243653
LR_15_TAR-Gh-1 - 22	rim of 27		31.029	7610	345	3750000	770	2.425	0.033	0.01424	0.00079	0.002281	2.7e-05	-0.00056298	0.0452	0.0024	0.000784	7.8e-05	14.35	0.79	0.81	14.68	0.17	0.2	15.8	1.6	2.4	-10	100	100	40500000000000	2400000000000	LR_15_TAR-Gh-1 - 22	0.002281	14.68	0.2	14.9372	0.211483	15.0175	0.21194
LR_15_TAR-Gh-1 - 23	rim		34.908	5600	262	2549000	523	1.697	0.034	0.0155	0.001	0.002384	4.1e-05	0.045838	0.0469	0.0031	0.00078	9.1e-05	15.6	1	1	15.35	0.27	0.29	15.8	1.8	2.6	50	130	130	30150000000000	840000000000	LR_15_TAR-Gh-1 - 23	0.002384	15.35	0.29	15.6493	0.303097	15.7219	0.30339
LR_15_TAR-Gh-1 - 24	rim		35.15	5330	248	2620000	538	1.361	0.016	0.01431	0.00093	0.002293	3.3e-05	0.12461	0.0463	0.0029	0.000678	6.8e-05	14.59	0.88	0.89	14.77	0.21	0.23	13.7	1.4	2.1	30	120	120	30000000000000	2700000000000	LR_15_TAR-Gh-1 - 24	0.002293	14.77	0.23	15.0585	0.243159	15.1258	0.243553
LR_15_TAR-Gh-1 - 25	rim		32.968	2210	108	984000	202	1.801	0.015	0.0163	0.0017	0.002448	5.4e-05	-0.004934	0.049	0.0053	0.00087	0.00017	16.4	1.7	1.7	15.76	0.35	0.36	17.5	3.4	3.9	190	200	200	12000000000000	1000000000000	LR_15_TAR-Gh-1 - 25	0.002448	15.76	0.36	16.1656	0.380139	16.2396	0.380361
LR_15_TAR-Gh-1 - 26	rim		35.15	7040	318	3420000	703	1.566	0.067	0.01468	0.00094	0.002292	3e-05	-0.0099285	0.0472	0.0029	0.000712	6.6e-05	14.79	0.94	0.96	14.76	0.19	0.21	14.4	1.3	2.1	90	120	120	39400000000000	3900000000000	LR_15_TAR-Gh-1 - 26	0.002292	14.76	0.21	15.0213	0.221565	15.0922	0.221997
LR_15_TAR-Gh-1 - 27	core of 22		24.241	4740	206	2400000	492	1.417	0.023	0.0138	0.0011	0.002276	4.7e-05	-0.090377	0.0444	0.0037	0.000673	6.6e-05	13.9	1.1	1.1	14.66	0.3	0.32	13.6	1.3	2	-40	150	150	27700000000000	4300000000000	LR_15_TAR-Gh-1 - 27	0.002276	14.66	0.32	14.9542	0.332945	15.0222	0.333237
LR_15_TAR-Gh-1 - 28	core of 30		15.514	3480	152	1830000	376	1.639	0.04	0.0146	0.0018	0.002296	5.6e-05	0.1097	0.0468	0.006	0.000509	8.6e-05	14.7	1.8	1.9	14.78	0.36	0.37	10.3	1.7	2.1	50	240	240	20200000000000	2100000000000	LR_15_TAR-Gh-1 - 28	0.002296	14.78	0.37	15.1081	0.385202	15.1848	0.38545
LR_15_TAR-Gh-1 - 29	rim		34.908	3480	166	1730000	355	1.925	0.016	0.01487	0.00087	0.002223	4.8e-05	0.20887	0.0471	0.0031	0.00079	8.8e-05	14.99	0.87	0.89	14.31	0.31	0.32	16	1.8	2.5	60	120	120	18700000000000	1400000000000	LR_15_TAR-Gh-1 - 29	0.002223	14.31	0.32	14.6352	0.335177	14.7124	0.335481
LR_15_TAR-Gh-1 - 30	rim of 28		20.605	2999	152	1469000	302	2.248	0.035	0.0158	0.0014	0.002304	5.8e-05	0.29915	0.0513	0.0045	0.00092	0.00016	15.9	1.4	1.4	14.83	0.37	0.38	18.5	3.2	3.8	270	190	190	16370000000000	510000000000	LR_15_TAR-Gh-1 - 30	0.002304	14.83	0.38	15.1804	0.396714	15.2585	0.396953
LR_15_TAR-Gh-1 - 31	rim		10.909	3100	155	1603000	329.6	2.113	0.035	0.0158	0.0014	0.002286	8.6e-05	0.32848	0.0509	0.0051	0.00083	0.00022	15.9	1.4	1.4	14.72	0.55	0.56	16.7	4.3	4.7	280	220	220	17660000000000	950000000000	LR_15_TAR-Gh-1 - 31	0.002286	14.72	0.56	15.0602	0.577922	15.1325	0.578089
LR_15_TAR-Gh-1 - 32	rim		35.15	1702	74.2	804000	165.3	2.514	0.064	0.0134	0.0017	0.002307	5.6e-05	0.023032	0.0447	0.0059	0.00065	0.00014	13.5	1.7	1.7	14.85	0.36	0.37	13.2	2.8	3.2	-60	220	220	8800000000000	400000000000	LR_15_TAR-Gh-1 - 32	0.002307	14.85	0.37	15.2636	0.391306	15.341	0.391548
LR_15_TAR-Gh-1 - 33	rim		23.272	4690	218	2379000	489	2.053	0.055	0.014	0.0011	0.002221	4e-05	0.04258	0.0467	0.0036	0.00072	0.0001	14.1	1.1	1.1	14.3	0.26	0.28	14.5	2.1	2.7	80	150	150	25500000000000	1400000000000	LR_15_TAR-Gh-1 - 33	0.002221	14.3	0.28	14.595	0.293234	14.6693	0.293582
LR_15_TAR-Gh-1 - 34	rim		34.908	2022	91	972000	200	1.871	0.017	0.0146	0.0017	0.002287	5.5e-05	-0.17588	0.0465	0.0057	0.00074	0.00013	14.7	1.7	1.7	14.73	0.36	0.37	14.9	2.6	3.1	20	210	210	10740000000000	640000000000	LR_15_TAR-Gh-1 - 34	0.002287	14.73	0.37	15.1202	0.389611	15.1888	0.389858
LR_15_TAR-Gh-1 - 35	rim	?young	16.242	4990	241	2370000	489	1.303	0.015	0.0145	0.0018	0.002151	5.5e-05	-0.31294	0.0494	0.0065	0.00071	0.00011	14.6	1.8	1.8	13.85	0.36	0.37	14.3	2.2	2.7	140	250	250	26450000000000	960000000000	LR_15_TAR-Gh-1 - 35	0.002151	13.85	0.37	14.1323	0.382745	14.2063	0.383029
LR_15_TAR-Gh-1 - 36	inner part	disc.	39.513	4880	530	2130000	439	1.36	0.015	0.05	0.011	0.00261	0.00012	0.53517	0.143	0.028	0.00186	0.00038	49	11	11	16.81	0.77	0.78	37.5	7.6	8.7	1770	360	360	27500000000000	1900000000000	LR_15_TAR-Gh-1 - 36	0.00261	16.81	0.78	17.1482	0.799255	17.2138	0.799348
LR_15_TAR-Gh-1 - 37	core of 47		25.938	8980	451	4240000	872	1.46	0.052	0.01631	0.00099	0.002338	3.7e-05	-0.26239	0.0507	0.0033	0.000728	5e-05	16.42	0.98	1	15.05	0.24	0.26	14.7	1	1.9	230	140	140	49800000000000	3500000000000	LR_15_TAR-Gh-1 - 37	0.002338	15.05	0.26	15.2928	0.269766	15.3697	0.270108
LR_15_TAR-Gh-1 - 38	rim		35.15	7700	351	3810000	785	1.999	0.047	0.014	0.00069	0.002237	2.9e-05	0.22241	0.0455	0.0021	0.000699	7.5e-05	14.11	0.69	0.71	14.4	0.19	0.21	14.1	1.5	2.2	16	92	92	41700000000000	3300000000000	LR_15_TAR-Gh-1 - 38	0.002237	14.4	0.21	14.6494	0.220815	14.7268	0.221271
LR_15_TAR-Gh-1 - 39	core of 46		10.181	6640	310	3370000	694	1.688	0.021	0.016	0.0012	0.00231	6.8e-05	0.30879	0.0498	0.0035	0.0007	0.00012	16.1	1.2	1.2	14.87	0.44	0.45	14.2	2.4	2.9	180	150	150	39400000000000	2400000000000	LR_15_TAR-Gh-1 - 39	0.00231	14.87	0.45	15.1332	0.461736	15.21	0.46194
LR_15_TAR-Gh-1 - 40	rim		13.333	16400	790	8300000	1700	2.115	0.069	0.0157	0.0012	0.00235	4.8e-05	0.27167	0.0488	0.0038	0.000783	9.5e-05	15.9	1.2	1.2	15.13	0.31	0.32	15.8	1.9	2.6	140	160	160	94000000000000	15000000000000	LR_15_TAR-Gh-1 - 40	0.00235	15.13	0.32	15.3102	0.326464	15.3842	0.326744
LR_15_TAR-Gh-1 - 41	rim	disc.	13.818	5950	390	3020000	623	1.806	0.027	0.0201	0.0058	0.002344	6.2e-05	-0.23602	0.062	0.019	0.00078	0.00013	20.2	5.7	5.7	15.09	0.4	0.41	15.8	2.5	3.1	400	390	390	34400000000000	2500000000000	LR_15_TAR-Gh-1 - 41	0.002344	15.09	0.41	15.3709	0.422315	15.4463	0.422532
LR_15_TAR-Gh-1 - 42	rim		23.029	5660	273	2370000	489	1.983	0.032	0.0169	0.0013	0.002503	5.2e-05	0.2667	0.0485	0.0038	0.00082	0.00012	17	1.3	1.3	16.12	0.33	0.35	16.6	2.4	3	130	150	150	28900000000000	2400000000000	LR_15_TAR-Gh-1 - 42	0.002503	16.12	0.35	16.4389	0.363938	16.5066	0.364159
LR_15_TAR-Gh-1 - 43	rim		15.272	4250	196	2200000	453	2.236	0.028	0.0154	0.0014	0.002345	5.5e-05	-0.31275	0.048	0.0057	0.00079	0.00014	15.5	1.4	1.4	15.1	0.36	0.37	15.9	2.8	3.3	90	220	220	24500000000000	1100000000000	LR_15_TAR-Gh-1 - 43	0.002345	15.1	0.37	15.4156	0.384215	15.4873	0.384454
LR_15_TAR-Gh-1 - 44	rim		35.15	5460	241	2700000	556	1.587	0.019	0.01375	0.00083	0.002243	2.8e-05	0.11815	0.045	0.0028	0.000701	7.8e-05	13.87	0.83	0.84	14.44	0.18	0.2	14.2	1.6	2.2	-20	110	110	30100000000000	1700000000000	LR_15_TAR-Gh-1 - 44	0.002243	14.44	0.2	14.7217	0.213364	14.7976	0.213832
LR_15_TAR-Gh-1 - 45	inner part		10.666	6740	351	3391000	700	1.713	0.037	0.0165	0.0017	0.002363	6.2e-05	-0.02039	0.0523	0.0068	0.00103	0.00015	16.6	1.7	1.8	15.21	0.4	0.41	20.9	3.1	3.9	250	250	250	39900000000000	1500000000000	LR_15_TAR-Gh-1 - 45	0.002363	15.21	0.41	15.478	0.421508	15.5556	0.421722
LR_15_TAR-Gh-1 - 46	rim of 39		35.15	3140	147	1534000	317	1.993	0.02	0.0149	0.0012	0.002256	3.9e-05	-0.014192	0.0477	0.0039	0.00083	0.00013	15	1.2	1.2	14.53	0.25	0.27	16.8	2.5	3.2	110	160	160	16900000000000	1000000000000	LR_15_TAR-Gh-1 - 46	0.002256	14.53	0.27	14.8701	0.286499	14.9394	0.286844
LR_15_TAR-Gh-1 - 47	rim of 37		19.151	8320	399	4363000	901	1.315	0.023	0.01487	0.00086	0.002239	4e-05	0.34385	0.0485	0.0027	0.000821	7.9e-05	14.98	0.86	0.87	14.42	0.26	0.27	16.6	1.6	2.5	130	110	110	49500000000000	1200000000000	LR_15_TAR-Gh-1 - 47	0.002239	14.42	0.27	14.6533	0.279323	14.7233	0.279683
LR_15_TAR-Gh-1 - 48	core		34.908	4400	206	2150000	444	1.548	0.014	0.0147	0.0011	0.002255	3.8e-05	0.088075	0.0471	0.0037	0.000813	8.8e-05	14.8	1.1	1.1	14.52	0.25	0.26	16.4	1.8	2.6	90	150	150	24600000000000	2400000000000	LR_15_TAR-Gh-1 - 48	0.002255	14.52	0.26	14.823	0.273874	14.896	0.274235
LR_15_TAR-Gh-1 - 49	rim		35.15	3059	146	1491000	308	2.104	0.044	0.0148	0.0012	0.002278	4.3e-05	0.12575	0.048	0.0038	0.000718	7.9e-05	14.9	1.2	1.2	14.67	0.28	0.29	14.5	1.6	2.3	120	150	150	16360000000000	690000000000	LR_15_TAR-Gh-1 - 49	0.002278	14.67	0.29	15.0166	0.30671	15.0874	0.307027
LR_15_TAR-Gh-1 - 50	core		18.181	2448	121	1105000	228	1.705	0.042	0.0152	0.0026	0.002279	5.8e-05	0.053727	0.049	0.0083	0.00062	0.00014	15.3	2.6	2.6	14.68	0.37	0.38	12.6	2.8	3.1	120	320	320	12590000000000	620000000000	LR_15_TAR-Gh-1 - 50	0.002279	14.68	0.38	15.053	0.3984	15.1201	0.398643
LR_15_TAR-Gh-1 - 51	rim		17.696	5100	246	2550000	528	1.425	0.019	0.0156	0.0016	0.002342	4.5e-05	0.20935	0.0488	0.0049	0.000725	9.9e-05	15.7	1.6	1.6	15.08	0.29	0.3	14.7	2	2.6	130	200	200	30100000000000	1200000000000	LR_15_TAR-Gh-1 - 51	0.002342	15.08	0.3	15.3742	0.312813	15.4467	0.313106
LR_15_TAR-Gh-1 - 52	rim		35.15	3912	174	1822000	376.8	1.816	0.063	0.01412	0.00086	0.002311	4.5e-05	0.12105	0.0442	0.0028	0.000804	9.3e-05	14.23	0.87	0.88	14.88	0.29	0.3	16.2	1.9	2.6	-50	120	120	21160000000000	690000000000	LR_15_TAR-Gh-1 - 52	0.002311	14.88	0.3	15.2057	0.315022	15.2788	0.315322
LR_15_TAR-Gh-1 - 53	rim		23.272	6660	300	3330000	689	1.632	0.032	0.0144	0.0011	0.00232	5e-05	0.42164	0.0468	0.0032	0.000685	8e-05	14.6	1.1	1.1	14.94	0.32	0.33	13.8	1.6	2.2	50	130	130	38400000000000	5100000000000	LR_15_TAR-Gh-1 - 53	0.00232	14.94	0.33	15.2071	0.341165	15.2781	0.341439
LR_15_TAR-3 - 1	core/inner part		17.696	7770	369	3541000	733	1.291	0.013	0.01495	0.00094	0.002285	3.7e-05	0.51419	0.0478	0.0028	0.000767	8.4e-05	15.06	0.94	0.95	14.71	0.24	0.26	15.5	1.7	2.4	130	130	130	41460000000000	840000000000	LR_15_TAR-3 - 1	0.002285	14.71	0.26	14.9654	0.270621	15.0414	0.270977
LR_15_TAR-3 - 2	rim	high common-Pb	35.15	4210	371	1823000	377	2.36	0.017	0.0295	0.0049	0.002476	5.5e-05	0.7792	0.084	0.013	0.00133	0.00024	29.4	4.8	4.8	15.94	0.36	0.37	26.8	4.9	5.8	1070	290	290	22200000000000	1000000000000	LR_15_TAR-3 - 2	0.002476	15.94	0.37	16.2837	0.385647	16.3579	0.38586
LR_15_TAR-3 - 3	core/inner part		35.15	10860	496	5320000	1101	1.646	0.055	0.01469	0.00073	0.002284	2.6e-05	0.48528	0.0469	0.0023	0.000751	6.1e-05	14.81	0.73	0.75	14.7	0.17	0.19	15.2	1.2	2.1	58	96	96	60200000000000	5200000000000	LR_15_TAR-3 - 3	0.002284	14.7	0.19	14.9186	0.199037	14.9982	0.199522
LR_15_TAR-3 - 4	core/inner part		35.15	3840	168	1880000	388	2.76	0.12	0.0146	0.0012	0.002294	5.3e-05	-0.052431	0.0456	0.0043	0.000799	9.6e-05	14.7	1.2	1.2	14.77	0.34	0.35	16.1	1.9	2.7	-10	170	170	20400000000000	2400000000000	LR_15_TAR-3 - 4	0.002294	14.77	0.35	15.0969	0.365073	15.1707	0.365335
LR_15_TAR-3 - 5	core/inner part		13.09	5470	257	2800000	580	1.43	0.022	0.0148	0.0014	0.002268	6.4e-05	0.16963	0.0473	0.0046	0.00073	9.5e-05	14.9	1.4	1.4	14.61	0.41	0.42	14.7	1.9	2.5	70	190	190	32280000000000	810000000000	LR_15_TAR-3 - 5	0.002268	14.61	0.42	14.8882	0.432476	14.9547	0.432702
LR_15_TAR-3 - 6	rim		35.15	5670	261	2740000	567	1.424	0.019	0.01474	0.00098	0.002239	3.2e-05	0.025986	0.0479	0.0034	0.00071	7.1e-05	14.85	0.98	0.99	14.42	0.21	0.23	14.3	1.4	2.2	70	130	130	31200000000000	2100000000000	LR_15_TAR-3 - 6	0.002239	14.42	0.23	14.6979	0.242489	14.7679	0.242903
LR_15_TAR-3 - 7	rim		35.15	2764	128	1345000	279	2.086	0.018	0.015	0.0012	0.002278	4.3e-05	0.25073	0.0465	0.0038	0.00081	0.00011	15.1	1.2	1.2	14.67	0.28	0.3	16.5	2.2	2.9	90	160	160	14770000000000	680000000000	LR_15_TAR-3 - 7	0.002278	14.67	0.3	15.0268	0.317389	15.0976	0.317695
LR_15_TAR-3 - 8	rim		35.15	5770	264	2740000	569	2.005	0.021	0.015	0.001	0.00232	2.7e-05	0.13149	0.0464	0.0029	0.000764	8.8e-05	15.1	1	1	14.94	0.17	0.2	15.4	1.8	2.5	40	120	120	31000000000000	1600000000000	LR_15_TAR-3 - 8	0.00232	14.94	0.2	15.2285	0.213782	15.2995	0.214219
LR_15_TAR-3 - 9	core/inner part		35.15	5270	247	2559000	531.8	1.662	0.079	0.01453	0.00093	0.002261	3.4e-05	-0.0026122	0.0472	0.0033	0.000726	7.3e-05	14.65	0.93	0.94	14.56	0.22	0.24	14.7	1.5	2.2	70	130	130	28890000000000	520000000000	LR_15_TAR-3 - 9	0.002261	14.56	0.24	14.8481	0.253037	14.9196	0.253426
LR_15_TAR-3 - 10	rim		25.211	3610	174	1720000	357	1.604	0.043	0.0156	0.0016	0.002251	5.1e-05	0.26815	0.0507	0.005	0.00074	0.0001	15.7	1.6	1.6	14.5	0.33	0.34	15	2	2.7	190	190	190	19400000000000	1500000000000	LR_15_TAR-3 - 10	0.002251	14.5	0.34	14.8259	0.355127	14.8929	0.355407
LR_15_TAR-3 - 11	rim		35.15	2538	120.6	1218000	253	2.077	0.018	0.01467	0.00092	0.002233	4.7e-05	0.019124	0.0483	0.003	0.00062	0.0001	14.78	0.92	0.93	14.38	0.3	0.32	12.6	2	2.5	90	130	130	13570000000000	720000000000	LR_15_TAR-3 - 11	0.002233	14.38	0.32	14.738	0.337508	14.8094	0.337807
LR_15_TAR-3 - 12	rim		27.393	10140	448	4980000	1035	2.042	0.05	0.01389	0.00086	0.002256	2.6e-05	0.12678	0.0447	0.0026	0.000797	6.5e-05	14.01	0.86	0.87	14.53	0.17	0.19	16.1	1.3	2.2	-40	110	110	55500000000000	2600000000000	LR_15_TAR-3 - 12	0.002256	14.53	0.19	14.7539	0.19941	14.8233	0.199906
LR_15_TAR-3 - 13	rim		34.908	3810	178	1800000	374	1.664	0.033	0.01452	0.00095	0.002347	4.1e-05	0.0097519	0.0463	0.003	0.00081	0.0001	14.63	0.95	0.96	15.11	0.27	0.28	16.3	2.1	2.8	30	120	120	20800000000000	1200000000000	LR_15_TAR-3 - 13	0.002347	15.11	0.28	15.4425	0.295576	15.5171	0.295885
LR_15_TAR-3 - 14	core/inner part of 13	high common-Pb	35.047	4800	1053	1783000	371.2	1.517	0.054	0.0902	0.0073	0.002949	6.7e-05	0.75873	0.226	0.014	0.00316	0.00036	88.4	6.7	6.7	18.98	0.43	0.45	63.8	7.2	10	2980	110	110	26500000000000	550000000000	LR_15_TAR-3 - 14	0.002949	18.98	0.45	19.3666	0.467176	19.4415	0.4673
LR_15_TAR-3 - 15	core/inner part		34.18	5860	275	2900000	603	1.68	0.055	0.0146	0.0011	0.00225	3.8e-05	0.069021	0.0474	0.0039	0.000722	9.6e-05	14.7	1.1	1.1	14.49	0.24	0.26	14.6	1.9	2.5	20	130	130	32800000000000	3900000000000	LR_15_TAR-3 - 15	0.00225	14.49	0.26	14.7643	0.271906	14.8351	0.272272
LR_15_TAR-3 - 16	rim		35.15	5570	253	2710000	565	1.716	0.042	0.01381	0.00085	0.002272	2.9e-05	0.012823	0.0453	0.003	0.000682	6.5e-05	13.92	0.85	0.86	14.63	0.18	0.21	13.8	1.3	2	-10	120	120	30600000000000	1700000000000	LR_15_TAR-3 - 16	0.002272	14.63	0.21	14.9138	0.223238	14.9861	0.223675
LR_15_TAR-3 - 17	rim		35.15	1820	91	855000	178	2.41	0.15	0.0153	0.0016	0.00229	5.6e-05	0.15993	0.0484	0.0052	0.00074	0.00017	15.4	1.6	1.7	14.74	0.36	0.37	14.9	3.5	3.9	170	210	210	9480000000000	690000000000	LR_15_TAR-3 - 17	0.00229	14.74	0.37	15.143	0.39057	15.2211	0.390816
LR_15_TAR-3 - 18	rim		17.939	3880	179	1780000	372	1.699	0.027	0.0158	0.0018	0.002299	3.8e-05	0.13384	0.0503	0.0056	0.00069	0.00011	15.9	1.8	1.8	14.8	0.25	0.26	13.9	2.2	2.7	190	220	220	20100000000000	1700000000000	LR_15_TAR-3 - 18	0.002299	14.8	0.26	15.1291	0.275689	15.205	0.276035
LR_15_TAR-3 - 19	rim		24.726	4252	209	2100000	438	1.721	0.037	0.0155	0.0011	0.002282	3.9e-05	-0.18842	0.0496	0.0043	0.00084	0.0001	15.6	1.1	1.2	14.69	0.25	0.27	16.9	2	2.8	160	170	170	24000000000000	670000000000	LR_15_TAR-3 - 19	0.002282	14.69	0.27	14.999	0.284141	15.0757	0.284481
LR_15_TAR-3 - 20	core/inner part of 19		22.787	5620	276	2830000	589	1.22	0.012	0.01522	0.00097	0.002281	4e-05	-0.089832	0.0487	0.0032	0.000742	7.8e-05	15.33	0.97	0.98	14.69	0.26	0.28	15	1.6	2.3	130	130	130	33600000000000	2700000000000	LR_15_TAR-3 - 20	0.002281	14.69	0.28	14.9658	0.291823	15.0359	0.292154
LR_15_TAR-3 - 21	rim		34.908	4770	223	2370000	494	1.75	0.025	0.0148	0.001	0.002228	3.1e-05	-0.11246	0.0486	0.0036	0.000646	7.9e-05	14.9	1	1.1	14.35	0.2	0.22	13.1	1.6	2.2	140	150	150	26300000000000	1900000000000	LR_15_TAR-3 - 21	0.002228	14.35	0.22	14.643	0.233794	14.7122	0.234227
LR_15_TAR-3 - 22	core/inner part		22.302	8450	368	4200000	877	1.527	0.021	0.01409	0.00073	0.002293	4.4e-05	0.17044	0.0449	0.0023	0.000723	6.9e-05	14.21	0.73	0.75	14.77	0.28	0.3	14.6	1.4	2.2	-27	95	95	49100000000000	3100000000000	LR_15_TAR-3 - 22	0.002293	14.77	0.3	15.0097	0.309584	15.077	0.309893
LR_15_TAR-3 - 23	rim		35.15	3590	162	1700000	355	2.143	0.025	0.0149	0.0013	0.002357	3.9e-05	0.12376	0.0463	0.004	0.00093	0.00013	15	1.3	1.3	15.18	0.25	0.27	18.7	2.6	3.3	40	160	160	19400000000000	1600000000000	LR_15_TAR-3 - 23	0.002357	15.18	0.27	15.5212	0.28632	15.59	0.286636
LR_15_TAR-3 - 24	core/inner part of 26		35.15	2947	144	1395000	291.3	1.596	0.028	0.0157	0.0014	0.002275	4.3e-05	0.21633	0.0503	0.0044	0.000798	9.1e-05	15.8	1.4	1.4	14.65	0.28	0.29	16.1	1.8	2.6	140	150	150	16260000000000	660000000000	LR_15_TAR-3 - 24	0.002275	14.65	0.29	14.9968	0.30673	15.0683	0.307047
LR_15_TAR-3 - 25	rim		34.908	3890	172	1830000	383	1.52	0.039	0.01498	0.00096	0.002302	4.2e-05	-0.042427	0.0468	0.0031	0.00074	8.6e-05	15.09	0.96	0.97	14.83	0.27	0.29	14.9	1.7	2.4	80	130	130	21500000000000	1500000000000	LR_15_TAR-3 - 25	0.002302	14.83	0.29	15.153	0.304915	15.218	0.305227
LR_15_TAR-3 - 26	rim		34.908	4940	236	2420000	505	1.75	0.017	0.01505	0.00089	0.002243	3.8e-05	-0.028287	0.0481	0.0028	0.000703	8.4e-05	15.16	0.89	0.9	14.44	0.25	0.26	14.2	1.7	2.3	130	120	120	27100000000000	1300000000000	LR_15_TAR-3 - 26	0.002243	14.44	0.26	14.7319	0.273119	14.8078	0.273485
LR_15_TAR-3 - 27	rim		31.029	4200	208	1950000	407	1.658	0.016	0.0155	0.0011	0.002312	4.8e-05	-0.03815	0.0494	0.0037	0.000787	8e-05	15.6	1.1	1.1	14.88	0.31	0.32	15.9	1.6	2.4	150	140	140	22700000000000	1500000000000	LR_15_TAR-3 - 27	0.002312	14.88	0.32	15.1986	0.334463	15.2783	0.334744
LR_15_TAR-3 - 28	rim2 of 27		22.787	7570	358	3790000	793	1.497	0.013	0.01507	0.00099	0.002272	4.4e-05	0.13232	0.0478	0.0031	0.000687	6.2e-05	15.19	0.99	1	14.63	0.28	0.3	13.9	1.3	2	120	130	130	43900000000000	2300000000000	LR_15_TAR-3 - 28	0.002272	14.63	0.3	14.8784	0.310128	14.9507	0.310442
LR_15_TAR-3 - 29	rim		35.15	2740	131	1304000	273	2.091	0.023	0.0154	0.0014	0.002315	4.5e-05	0.20022	0.0479	0.0044	0.00072	0.00012	15.5	1.4	1.4	14.91	0.29	0.3	14.5	2.4	2.9	110	160	160	14590000000000	860000000000	LR_15_TAR-3 - 29	0.002315	14.91	0.3	15.2739	0.317811	15.3426	0.318107
LR_15_TAR-3 - 30	rim	few common-Pb	17.454	4500	232	2287000	479	1.833	0.02	0.0162	0.002	0.002263	5.8e-05	0.11102	0.052	0.0063	0.00072	0.00012	16.3	2	2	14.57	0.37	0.39	14.5	2.3	2.8	240	240	240	26000000000000	1400000000000	LR_15_TAR-3 - 30	0.002263	14.57	0.39	14.8686	0.403517	14.9431	0.403761
LR_15_TAR-3 - 31	rim		20.848	8210	401	4050000	849	1.635	0.052	0.0154	0.00093	0.0023	3.6e-05	-0.088427	0.048	0.003	0.000701	6.6e-05	15.51	0.93	0.95	14.81	0.23	0.25	14.2	1.3	2.1	130	130	130	47000000000000	4600000000000	LR_15_TAR-3 - 31	0.0023	14.81	0.25	15.0547	0.259991	15.1271	0.260357
LR_15_TAR-3 - 32	rim		11.151	6580	321	3460000	724	1.997	0.02	0.0153	0.0013	0.002258	5.5e-05	0.26242	0.0496	0.0043	0.00073	0.00012	15.4	1.3	1.3	14.54	0.36	0.37	14.7	2.4	2.9	160	180	180	38500000000000	1800000000000	LR_15_TAR-3 - 32	0.002258	14.54	0.37	14.7997	0.381056	14.8719	0.381315
LR_15_TAR-3 - 33	rim		34.908	2810	128	1325000	277.5	1.82	0.054	0.0144	0.0012	0.002294	4.1e-05	0.25717	0.0441	0.0034	0.00082	0.00013	14.5	1.2	1.2	14.77	0.26	0.28	16.6	2.5	3.1	-30	140	140	15250000000000	640000000000	LR_15_TAR-3 - 33	0.002294	14.77	0.28	15.126	0.297493	15.1998	0.297815
LR_15_TAR-3 - 34	rim		34.908	2820	139	1382000	290	1.95	0.014	0.0154	0.0015	0.00226	3.9e-05	-0.056684	0.0499	0.005	0.000718	9.6e-05	15.5	1.5	1.5	14.55	0.25	0.27	14.5	1.9	2.5	160	190	190	15290000000000	890000000000	LR_15_TAR-3 - 34	0.00226	14.55	0.27	14.9005	0.287292	14.9756	0.287635
LR_15_TAR-3 - 35	rim		17.211	3560	151	1781000	373	2.446	0.028	0.014	0.0016	0.002327	7.6e-05	-0.39822	0.0447	0.0055	0.00064	0.00018	14.2	1.6	1.6	14.99	0.49	0.5	12.9	3.7	4	-80	230	230	20010000000000	810000000000	LR_15_TAR-3 - 35	0.002327	14.99	0.5	15.3238	0.516503	15.3896	0.516683
LR_15_TAR-3 - 36	core/inner part of 35		16.484	2860	138	1465000	307	1.637	0.052	0.0157	0.0019	0.002246	6.4e-05	-0.017117	0.0502	0.0059	0.00066	0.00017	15.8	1.9	1.9	14.46	0.41	0.42	13.2	3.4	3.7	240	240	240	16500000000000	1000000000000	LR_15_TAR-3 - 36	0.002246	14.46	0.42	14.8008	0.436539	14.8759	0.436768
LR_15_TAR-3 - 37	rim	old outlier	12.848	3620	172	1650000	346	1.749	0.05	0.0158	0.0021	0.002431	7.7e-05	0.19861	0.0457	0.0057	0.00086	0.00017	15.9	2.1	2.1	15.65	0.49	0.5	17.5	3.4	3.9	70	240	240	20010000000000	920000000000	LR_15_TAR-3 - 37	0.002431	15.65	0.5	15.9984	0.516983	16.0733	0.517148
LR_15_TAR-3 - 38	rim		15.514	7540	368	3810000	800	1.505	0.014	0.0151	0.001	0.002231	4.1e-05	0.090476	0.0491	0.0036	0.000717	7.4e-05	15.2	1	1	14.37	0.26	0.28	14.5	1.5	2.2	150	150	150	43700000000000	2000000000000	LR_15_TAR-3 - 38	0.002231	14.37	0.28	14.6144	0.28998	14.683	0.290328
LR_15_TAR-3 - 39	core/inner part of 38	few common-Pb	25.696	6760	346	3270000	686	1.81	0.12	0.01615	0.00072	0.002261	4.3e-05	-0.36634	0.052	0.0028	0.0009	0.0001	16.26	0.72	0.74	14.56	0.28	0.29	18.1	2.1	2.9	270	110	110	37800000000000	4800000000000	LR_15_TAR-3 - 39	0.002261	14.56	0.29	14.8218	0.30096	14.8934	0.301287
LR_15_TAR-3 - 40	rim		35.15	3401	150	1588000	333.4	2.2	0.021	0.0144	0.0012	0.002335	3.6e-05	0.16474	0.0452	0.0039	0.00069	0.00011	14.5	1.2	1.3	15.04	0.23	0.25	13.9	2.2	2.7	-10	150	150	17830000000000	680000000000	LR_15_TAR-3 - 40	0.002335	15.04	0.25	15.3866	0.267139	15.4539	0.267485
LR_15_TAR-3 - 41	rim		34.908	7370	355	3510000	737	1.681	0.062	0.01537	0.00075	0.002352	3.1e-05	-0.11684	0.0474	0.0027	0.00077	7.9e-05	15.48	0.75	0.77	15.15	0.2	0.22	15.6	1.6	2.4	80	110	110	41300000000000	2500000000000	LR_15_TAR-3 - 41	0.002352	15.15	0.22	15.4134	0.23146	15.4802	0.231854
LR_15_TAR-3 - 42	core/inner part		34.908	5760	277	2820000	592	1.876	0.025	0.0151	0.00084	0.002255	3.4e-05	0.093896	0.049	0.0028	0.000689	8.2e-05	15.22	0.84	0.86	14.52	0.22	0.24	14.2	1.6	2.2	150	110	110	31700000000000	2300000000000	LR_15_TAR-3 - 42	0.002255	14.52	0.24	14.7982	0.252354	14.8712	0.252746
LR_15_TAR-3 - 43	core/inner part of 41		35.15	6550	313	3200000	673	1.645	0.017	0.01481	0.00082	0.002249	3e-05	-0.032952	0.0479	0.0028	0.000693	6.1e-05	14.93	0.82	0.84	14.48	0.19	0.21	14	1.2	2	140	120	120	36800000000000	1800000000000	LR_15_TAR-3 - 43	0.002249	14.48	0.21	14.743	0.221742	14.8174	0.222191
LR_15_TAR-3 - 44	rim	young outlier	19.878	14060	613	6770000	1424	1.1435	0.0071	0.01309	0.00053	0.002153	2.4e-05	0.012489	0.0443	0.0019	0.000665	4.3e-05	13.21	0.53	0.55	13.86	0.15	0.18	13.44	0.87	1.7	-53	81	81	77700000000000	2100000000000	LR_15_TAR-3 - 44	0.002153	13.86	0.18	14.0426	0.187061	14.1196	0.187641
LR_15_TAR-3 - 45	core/inner part of 44	few common-Pb	35.045	18100	1110	8630000	1810	0.878	0.056	0.0184	0.0013	0.002267	2.3e-05	0.6472	0.0596	0.0045	0.000766	4.1e-05	18.5	1.3	1.3	14.6	0.15	0.17	15.48	0.82	1.9	560	150	150	111000000000000	12000000000000	LR_15_TAR-3 - 45	0.002267	14.6	0.17	14.7578	0.175751	14.828	0.176308
LR_15_TAR-3 - 46	rim		26.423	6570	299	3202000	674	1.654	0.064	0.0141	0.001	0.002259	4.1e-05	0.2928	0.0456	0.0032	0.000722	9.1e-05	14.2	1	1	14.54	0.26	0.28	14.6	1.8	2.5	60	140	140	37300000000000	1200000000000	LR_15_TAR-3 - 46	0.002259	14.54	0.28	14.8027	0.291046	14.8816	0.291385
LR_15_TAR-3 - 47	core/inner part of 46		22.544	4650	232	2303000	485	1.494	0.073	0.0156	0.0013	0.002314	4.5e-05	0.16113	0.0491	0.0043	0.00069	0.0001	15.7	1.3	1.3	14.9	0.29	0.31	14	2	2.6	140	170	170	27500000000000	850000000000	LR_15_TAR-3 - 47	0.002314	14.9	0.31	15.1998	0.323217	15.2722	0.323508
LR_15_TAR-3 - 48	core/inner part of 49	few common-Pb	34.423	10120	521	5060000	1065	1.095	0.06	0.01573	0.00087	0.0022	4.6e-05	0.13572	0.0519	0.0028	0.000745	4.5e-05	15.85	0.87	0.89	14.17	0.3	0.31	15.06	0.9	1.9	250	110	110	59700000000000	1700000000000	LR_15_TAR-3 - 48	0.0022	14.17	0.31	14.3815	0.318226	14.4507	0.318553
LR_15_TAR-3 - 49	rim		35.15	3840	179	1832000	386	1.802	0.033	0.0153	0.0011	0.00228	3.8e-05	-0.12763	0.0483	0.0035	0.00083	7.3e-05	15.4	1.1	1.1	14.68	0.25	0.27	16.8	1.5	2.4	130	140	140	21000000000000	1100000000000	LR_15_TAR-3 - 49	0.00228	14.68	0.27	15.0021	0.285085	15.0758	0.285425
LR_15_TAR-3 - 50	rim	young outlier	35.15	16710	740	8460000	1780	0.936	0.017	0.01358	0.00045	0.002188	2.1e-05	0.20604	0.0454	0.0014	0.000678	2.9e-05	13.69	0.45	0.47	14.09	0.13	0.16	13.69	0.58	1.6	-16	62	62	102900000000000	6900000000000	LR_15_TAR-3 - 50	0.002188	14.09	0.16	14.2493	0.165985	14.3215	0.166618
LR_15_TAR-3 - 51	rim		35.15	13800	642	6700000	1410	0.932	0.033	0.01461	0.0006	0.002262	2.6e-05	-0.046928	0.0465	0.002	0.000693	2.8e-05	14.72	0.6	0.62	14.56	0.17	0.19	14.01	0.56	1.7	32	88	88	85900000000000	8000000000000	LR_15_TAR-3 - 51	0.002262	14.56	0.19	14.7421	0.196852	14.8202	0.197352
LR_15_TAR-3 - 52	core/inner part		35.15	3670	180	1730000	367	2.009	0.026	0.0158	0.0014	0.002322	4.1e-05	0.18076	0.0487	0.0043	0.000668	9e-05	15.9	1.4	1.4	14.95	0.26	0.28	13.5	1.8	2.4	120	170	170	20100000000000	1300000000000	LR_15_TAR-3 - 52	0.002322	14.95	0.28	15.2824	0.295634	15.3562	0.29595
LR_15_TAR-3 - 53	core/inner part		20.848	5890	278	2910000	615	2.1	0.068	0.0146	0.0015	0.002317	3.9e-05	0.067653	0.0458	0.0048	0.00074	0.00011	14.7	1.5	1.5	14.92	0.25	0.27	14.9	2.3	2.8	0	180	180	33000000000000	2200000000000	LR_15_TAR-3 - 53	0.002317	14.92	0.27	15.2019	0.282203	15.2736	0.282536
LR_16_SZIV - 1	rim		22.302	5840	272	2810000	594	2.088	0.049	0.0139	0.0012	0.002091	4.4e-05	-0.017967	0.0482	0.0042	0.00066	0.0001	14	1.2	1.2	13.47	0.29	0.3	13.4	2	2.5	110	170	170	29700000000000	2100000000000	LR_16_SZIV - 1	0.002091	13.47	0.3	13.734	0.311495	13.802	0.311865
LR_16_SZIV - 2	rim	disc.	35.04	7950	781	3690000	780	1.52	0.15	0.0321	0.0035	0.002329	5.3e-05	0.81279	0.0987	0.0093	0.00127	0.00017	32	3.4	3.4	14.99	0.34	0.36	25.6	3.5	4.6	1500	200	200	44600000000000	1500000000000	LR_16_SZIV - 2	0.002329	14.99	0.36	15.2429	0.370436	15.322	0.370687
LR_16_SZIV - 3	rim		34.908	8110	373	4140000	877	2.748	0.032	0.01422	0.00075	0.002202	2.8e-05	0.092227	0.0473	0.0025	0.000758	8.3e-05	14.34	0.75	0.77	14.18	0.18	0.2	15.3	1.7	2.4	80	100	100	43500000000000	4800000000000	LR_16_SZIV - 3	0.002202	14.18	0.2	14.4216	0.210486	14.4937	0.21098
LR_16_SZIV - 4	rim		35.15	6640	304	3220000	683	2.936	0.086	0.01398	0.0008	0.002257	2.8e-05	0.080028	0.0454	0.0026	0.000765	7.4e-05	14.09	0.8	0.81	14.53	0.18	0.21	15.5	1.5	2.3	0	110	110	35100000000000	2800000000000	LR_16_SZIV - 4	0.002257	14.53	0.21	14.7985	0.222128	14.8744	0.222572
LR_16_SZIV - 5	rim		23.514	4380	210	2200000	466	1.994	0.033	0.0147	0.0012	0.002231	4.5e-05	0.05102	0.0482	0.0041	0.00071	0.00013	14.8	1.2	1.2	14.36	0.29	0.3	14.3	2.5	3	110	170	170	24600000000000	1700000000000	LR_16_SZIV - 5	0.002231	14.36	0.3	14.6597	0.313451	14.7384	0.313774
LR_16_SZIV - 6	rim		35.15	9130	423	4610000	977	2.969	0.045	0.01434	0.00064	0.00221	2.8e-05	0.16728	0.0477	0.0022	0.000707	6.7e-05	14.46	0.64	0.66	14.23	0.18	0.2	14.3	1.3	2.1	93	93	93	49000000000000	4800000000000	LR_16_SZIV - 6	0.00221	14.23	0.2	14.4611	0.20977	14.5347	0.210261
LR_16_SZIV - 7	rim	?young	26.666	7390	357	3760000	798	1.786	0.033	0.01404	0.00077	0.002087	3.2e-05	-0.19963	0.0489	0.003	0.0007	7.2e-05	14.15	0.77	0.79	13.44	0.21	0.23	14.1	1.4	2.2	140	120	120	39600000000000	1400000000000	LR_16_SZIV - 7	0.002087	13.44	0.23	13.6775	0.240016	13.7499	0.240497
LR_16_SZIV - 8	inner part		35.15	5430	266	2690000	571	1.883	0.077	0.0149	0.001	0.002238	3e-05	0.095799	0.0487	0.0035	0.000716	7.4e-05	15	1	1	14.41	0.2	0.22	14.5	1.5	2.2	130	140	140	29900000000000	1600000000000	LR_16_SZIV - 8	0.002238	14.41	0.22	14.6918	0.232939	14.7654	0.233371
LR_16_SZIV - 9	rim		35.15	3710	184	1810000	385	1.38	0.023	0.0146	0.001	0.002177	4e-05	-0.1333	0.0489	0.004	0.00069	0.0001	14.7	1	1	14.02	0.26	0.27	13.9	2	2.6	150	150	150	21100000000000	2200000000000	LR_16_SZIV - 9	0.002177	14.02	0.27	14.3271	0.284259	14.3983	0.284633
LR_16_SZIV - 10	inner part		34.908	3190	157	1650000	349	1.536	0.044	0.0146	0.0014	0.002153	4.1e-05	0.12066	0.0493	0.0047	0.000633	7.7e-05	14.7	1.4	1.4	13.86	0.27	0.28	12.8	1.6	2.1	170	180	180	17900000000000	1500000000000	LR_16_SZIV - 10	0.002153	13.86	0.28	14.179	0.295114	14.256	0.295482
LR_16_SZIV - 11	rim		35.15	9990	473	5010000	1064	2.251	0.023	0.01434	0.00059	0.002218	3.1e-05	0.16914	0.0473	0.002	0.000749	6.7e-05	14.46	0.59	0.61	14.28	0.2	0.22	15.1	1.3	2.2	77	84	84	54500000000000	3700000000000	LR_16_SZIV - 11	0.002218	14.28	0.22	14.5018	0.228928	14.5769	0.229375
LR_16_SZIV - 12	rim		35.15	11270	533	5377000	1142	1.08	0.017	0.0146	0.00059	0.002269	2.9e-05	0.42403	0.047	0.0017	0.00074	4.1e-05	14.71	0.59	0.62	14.61	0.19	0.21	14.95	0.83	1.9	66	74	74	66700000000000	1400000000000	LR_16_SZIV - 12	0.002269	14.61	0.21	14.8173	0.218092	14.8904	0.218541
LR_16_SZIV - 13	rim		17.211	7510	343	3890000	826	1.94	0.032	0.01393	0.0009	0.002235	3.9e-05	0.12373	0.0458	0.0031	0.000642	9.8e-05	14.05	0.9	0.91	14.39	0.25	0.27	13	2	2.5	20	130	130	43900000000000	1800000000000	LR_16_SZIV - 13	0.002235	14.39	0.27	14.6343	0.279987	14.7087	0.280347
LR_16_SZIV - 14	inner part		25.938	4870	224	2510000	534	1.892	0.087	0.0144	0.0012	0.002197	3.4e-05	0.17077	0.0468	0.0036	0.000779	7.2e-05	14.6	1.2	1.2	14.15	0.22	0.24	15.7	1.5	2.3	50	140	140	27800000000000	2100000000000	LR_16_SZIV - 14	0.002197	14.15	0.24	14.4336	0.252843	14.5035	0.253255
LR_16_SZIV - 15	rim	old	35.15	138300	7990	2760000	587	3.25	0.1	0.454	0.019	0.0567	0.0022	0.95507	0.05837	0.00066	0.02	0.0016	379	14	14	355	13	14	400	31	54	546	24	24	735000000000000	36000000000000	LR_16_SZIV - 15	0.0567	355	14	354.453	13.9857	355.062	13.9857
LR_16_SZIV - 16	rim		34.908	5730	270	2953000	628	1.113	0.013	0.01382	0.00082	0.002123	3.6e-05	-0.067266	0.0481	0.0029	0.000665	6.1e-05	14.05	0.81	0.82	13.67	0.23	0.25	13.4	1.2	2	110	120	120	34000000000000	1500000000000	LR_16_SZIV - 16	0.002123	13.67	0.25	13.9255	0.260985	13.9995	0.261412
LR_16_SZIV - 17	rim		35.15	7210	336	3590000	765	2.152	0.068	0.014	0.00084	0.002222	3.1e-05	0.33385	0.0469	0.0026	0.000749	8e-05	14.12	0.84	0.85	14.31	0.2	0.22	15.1	1.6	2.3	40	110	110	39500000000000	2300000000000	LR_16_SZIV - 17	0.002222	14.31	0.22	14.5631	0.230937	14.6338	0.231378
LR_16_SZIV - 18	inner part		35.15	7000	324	3400000	720	2.065	0.078	0.015	0.0011	0.002285	3.7e-05	0.31444	0.0472	0.0031	0.000768	8.3e-05	15.1	1.1	1.1	14.71	0.24	0.25	15.5	1.7	2.4	70	120	120	38100000000000	7300000000000	LR_16_SZIV - 18	0.002285	14.71	0.25	14.9737	0.261223	15.0497	0.261592
LR_16_SZIV - 19	rim		23.514	3430	154	1743000	371	1.881	0.037	0.0133	0.0014	0.002196	5.4e-05	0.026132	0.0443	0.0048	0.00072	0.00012	13.5	1.4	1.4	14.14	0.35	0.36	14.6	2.4	2.9	-50	190	190	19600000000000	1300000000000	LR_16_SZIV - 19	0.002196	14.14	0.36	14.4568	0.374759	14.5303	0.375038
LR_16_SZIV - 20	rim		22.06	2710	128	1288000	274	1.203	0.029	0.0142	0.0017	0.002174	6.6e-05	-0.065852	0.0467	0.0054	0.00072	8e-05	14.3	1.7	1.7	14	0.43	0.44	14.5	1.6	2.3	40	210	210	15030000000000	730000000000	LR_16_SZIV - 20	0.002174	14	0.44	14.3389	0.456915	14.4108	0.457148
LR_16_SZIV - 21	inner part		14.06	6200	300	3130000	668	1.253	0.046	0.0156	0.0012	0.002292	5.9e-05	0.13779	0.0494	0.0036	0.000793	9.1e-05	15.7	1.2	1.2	14.76	0.38	0.39	16	1.8	2.6	160	150	150	38700000000000	1400000000000	LR_16_SZIV - 21	0.002292	14.76	0.39	15.0231	0.401286	15.094	0.401525
LR_16_SZIV - 22	rim		24.969	8060	377	3973000	847	2.274	0.032	0.01411	0.00074	0.002151	3.4e-05	0.081949	0.0476	0.0025	0.000646	8.2e-05	14.23	0.74	0.75	13.85	0.22	0.24	13.1	1.7	2.2	70	110	110	42360000000000	940000000000	LR_16_SZIV - 22	0.002151	13.85	0.24	14.0885	0.249903	14.1626	0.250339
LR_16_SZIV - 23	rim	disc.	35.067	3220	550	1250000	267	1.88	0.045	0.071	0.012	0.0028	0.00012	0.86817	0.173	0.024	0.00247	0.00041	68	11	11	18.01	0.78	0.79	49.9	8.2	9.9	2330	270	270	18200000000000	2400000000000	LR_16_SZIV - 23	0.0028	18.01	0.79	18.4225	0.813295	18.51	0.813374
LR_16_SZIV - 24	inner part	disc.	35.05	4740	3160	352000	75	1.91	0.13	2.93	0.95	0.0301	0.0089	0.9964	0.544	0.086	0.119	0.032	1130	260	260	188	55	55	2180	570	610	3920	480	480	25700000000000	3300000000000	LR_16_SZIV - 24	0.0301	188	55	191.868	56.1382	195.12	56.1382
LR_16_SZIV - 25	inner part		31.271	3330	157	1710000	366	2.01	0.13	0.0142	0.0011	0.002174	4.5e-05	0.23807	0.0479	0.0038	0.0007	0.00011	14.6	1.2	1.2	14	0.29	0.31	14.1	2.2	2.7	100	150	150	18900000000000	1900000000000	LR_16_SZIV - 25	0.002174	14	0.31	14.3171	0.324783	14.389	0.325111
LR_16_SZIV - 26	inner part		34.908	3150	151	1516000	324	1.713	0.023	0.0142	0.0013	0.002189	5.2e-05	0.32123	0.0481	0.0041	0.00067	8.6e-05	14.3	1.3	1.3	14.1	0.34	0.35	13.5	1.7	2.3	130	170	170	17580000000000	750000000000	LR_16_SZIV - 26	0.002189	14.1	0.35	14.4263	0.365387	14.4946	0.365675
LR_16_SZIV - 27	rim of 28		34.908	4430	205	2160000	461	3.83	0.17	0.0144	0.0013	0.00225	3.9e-05	-0.011545	0.046	0.0041	0.0007	0.00011	14.5	1.3	1.3	14.49	0.25	0.27	14.2	2.3	2.8	20	160	160	23600000000000	1900000000000	LR_16_SZIV - 27	0.00225	14.49	0.27	14.7965	0.284032	14.8672	0.284382
LR_16_SZIV - 28	rim of 27		35.15	9400	415	4810000	1028	1.655	0.026	0.01333	0.00058	0.002156	2.5e-05	0.075466	0.0453	0.0021	0.000707	5.5e-05	13.45	0.58	0.6	13.88	0.16	0.19	14.3	1.1	2	-27	83	83	53300000000000	3300000000000	LR_16_SZIV - 28	0.002156	13.88	0.19	14.0977	0.199095	14.174	0.199638
LR_16_SZIV - 29	rim		35.15	11120	524	5630000	1203	2.143	0.027	0.01429	0.00068	0.002174	2.5e-05	0.22795	0.0482	0.0021	0.00067	5.4e-05	14.41	0.69	0.7	14	0.16	0.18	13.5	1.1	1.9	125	92	92	61100000000000	2900000000000	LR_16_SZIV - 29	0.002174	14	0.18	14.2068	0.188534	14.2788	0.189098
LR_16_SZIV - 30	inner part		21.575	8030	366	3960000	848	1.621	0.028	0.01474	0.00094	0.002295	2.5e-05	-0.062099	0.0461	0.003	0.000728	8.4e-05	14.86	0.94	0.96	14.78	0.16	0.19	14.7	1.7	2.4	40	130	130	47100000000000	2100000000000	LR_16_SZIV - 30	0.002295	14.78	0.19	15.024	0.200743	15.0942	0.201219
LR_16_SZIV - 31	rim		21.817	9120	441	4770000	1021	1.569	0.028	0.0148	0.0011	0.002168	3.3e-05	0.11411	0.0494	0.0036	0.000747	7.5e-05	14.9	1.1	1.1	13.96	0.21	0.23	15.1	1.5	2.3	150	150	150	54000000000000	4000000000000	LR_16_SZIV - 31	0.002168	13.96	0.23	14.1777	0.238669	14.2512	0.239117
LR_16_SZIV - 32	rim		22.06	8910	420	4670000	999	2.221	0.02	0.01426	0.00063	0.002169	3.6e-05	0.31502	0.0478	0.0021	0.000749	8.8e-05	14.38	0.63	0.65	13.97	0.23	0.25	15.1	1.8	2.5	94	93	93	50700000000000	1400000000000	LR_16_SZIV - 32	0.002169	13.97	0.25	14.1937	0.258931	14.2636	0.259344
LR_16_SZIV - 33	rim		34.908	6750	320	3420000	733	2.211	0.059	0.01416	0.0009	0.002188	2.5e-05	-0.03061	0.0468	0.0029	0.000709	7.2e-05	14.27	0.9	0.92	14.09	0.16	0.19	14.3	1.5	2.2	50	120	120	37200000000000	2600000000000	LR_16_SZIV - 33	0.002188	14.09	0.19	14.3449	0.201649	14.4169	0.20217
LR_16_SZIV - 34	rim	disc.	14.302	6420	334	3240000	695	2.568	0.035	0.0161	0.0017	0.002245	4e-05	0.39144	0.0524	0.0051	0.00072	0.00015	16.2	1.7	1.7	14.46	0.26	0.27	14.6	3.1	3.5	280	200	200	35700000000000	1400000000000	LR_16_SZIV - 34	0.002245	14.46	0.27	14.7255	0.281285	14.7941	0.28164
LR_16_SZIV - 35	rim		34.908	3770	183	1910000	410	1.3952	0.0092	0.0147	0.00095	0.002197	3.5e-05	-0.10788	0.0493	0.0037	0.000769	9.3e-05	14.81	0.95	0.97	14.14	0.23	0.25	15.5	1.9	2.6	170	140	140	21900000000000	1900000000000	LR_16_SZIV - 35	0.002197	14.14	0.25	14.4462	0.264355	14.5262	0.264749
LR_16_SZIV - 36	rim		35.15	11300	511	5650000	1213	2.083	0.023	0.01388	0.00062	0.002184	2.9e-05	0.24375	0.046	0.002	0.00071	5.4e-05	14	0.62	0.64	14.06	0.19	0.21	14.3	1.1	1.9	19	82	82	61700000000000	2300000000000	LR_16_SZIV - 36	0.002184	14.06	0.21	14.2668	0.218147	14.3432	0.218631
LR_16_SZIV - 37	rim		35.15	6500	288	3220000	691	2.322	0.069	0.01411	0.0008	0.002248	3.9e-05	0.28245	0.0449	0.0024	0.000696	7.3e-05	14.22	0.8	0.81	14.48	0.25	0.27	14.1	1.5	2.2	-23	97	97	36100000000000	3500000000000	LR_16_SZIV - 37	0.002248	14.48	0.27	14.7448	0.281233	14.8127	0.281587
LR_16_SZIV - 38	inner part		15.272	4420	229	2220000	477	1.275	0.039	0.0154	0.0012	0.002236	6.1e-05	0.0091261	0.05	0.004	0.00082	0.0001	15.6	1.2	1.2	14.4	0.4	0.41	16.6	2.1	2.8	200	170	170	26400000000000	1500000000000	LR_16_SZIV - 38	0.002236	14.4	0.41	14.6937	0.423448	14.7644	0.423686
LR_16_SZIV - 39	rim		29.332	5350	260	2697000	579	2.73	0.17	0.01429	0.00088	0.00214	3e-05	0.033388	0.0496	0.003	0.000762	8.9e-05	14.41	0.88	0.9	13.78	0.19	0.21	15.4	1.8	2.5	190	120	120	28300000000000	1000000000000	LR_16_SZIV - 39	0.00214	13.78	0.21	14.0546	0.222759	14.1279	0.223252
LR_16_SZIV - 40	rim of 42		22.302	7100	334	3720000	800	2.121	0.045	0.01426	0.00088	0.002169	3.1e-05	-0.083511	0.0474	0.0031	0.000637	7.4e-05	14.38	0.88	0.9	13.97	0.2	0.22	12.9	1.5	2.1	80	130	130	40600000000000	1400000000000	LR_16_SZIV - 40	0.002169	13.97	0.22	14.2145	0.230439	14.2843	0.230904
LR_16_SZIV - 41	rim		35.15	13680	647	6840000	1471	2.595	0.03	0.01424	0.00044	0.002204	2.4e-05	0.13713	0.0473	0.0014	0.00067	4.9e-05	14.36	0.44	0.47	14.19	0.15	0.18	13.55	0.99	1.8	50	66	66	74100000000000	3200000000000	LR_16_SZIV - 41	0.002204	14.19	0.18	14.3814	0.187551	14.4564	0.188103
LR_16_SZIV - 42	core of 40		35.15	1464	66	729000	157	1.591	0.019	0.0142	0.0022	0.002189	5.1e-05	0.074906	0.0459	0.0071	0.00088	0.00015	14.3	2.2	2.2	14.1	0.33	0.34	17.8	3.1	3.7	40	270	270	8340000000000	610000000000	LR_16_SZIV - 42	0.002189	14.1	0.34	14.4979	0.360659	14.5661	0.36095
LR_16_SZIV - 43	rim	disc.	33.453	4670	288	2241000	482	2.98	0.14	0.0189	0.0014	0.002259	3.2e-05	0.3483	0.0606	0.0044	0.00094	0.00012	19	1.4	1.4	14.54	0.2	0.23	18.9	2.3	3.2	580	150	150	25000000000000	1300000000000	LR_16_SZIV - 43	0.002259	14.54	0.23	14.8419	0.244215	14.9207	0.244619
LR_16_SZIV - 44	rim		35.15	6130	292	2972000	642	2.987	0.041	0.01494	0.00081	0.00224	2.7e-05	0.14826	0.0476	0.0026	0.00069	9.3e-05	15.05	0.81	0.83	14.43	0.17	0.2	13.9	1.9	2.4	110	110	110	32360000000000	710000000000	LR_16_SZIV - 44	0.00224	14.43	0.2	14.7045	0.212813	14.7709	0.213284
LR_16_SZIV - 45	rim		35.15	8410	394	4230000	913	2.462	0.019	0.01416	0.00069	0.002172	3.1e-05	0.30482	0.0479	0.0022	0.000692	5.5e-05	14.28	0.69	0.71	13.99	0.2	0.22	14	1.1	1.9	110	95	95	45900000000000	2400000000000	LR_16_SZIV - 45	0.002172	13.99	0.22	14.2234	0.229709	14.2925	0.230173
LR_16_SZIV - 46	rim of 47		10.909	17120	776	9450000	2043	1.876	0.034	0.01371	0.00064	0.002134	2.9e-05	0.22775	0.0458	0.0018	0.000721	6.5e-05	13.82	0.64	0.66	13.74	0.19	0.21	14.6	1.3	2.1	6	80	80	103900000000000	1600000000000	LR_16_SZIV - 46	0.002134	13.74	0.21	13.8945	0.215375	13.9693	0.215888
LR_16_SZIV - 47	rim of 46		23.514	17650	841	9340000	2020	1.511	0.02	0.01407	0.00063	0.002145	2.7e-05	-0.11731	0.0477	0.0023	0.000707	4.7e-05	14.18	0.63	0.65	13.81	0.17	0.2	14.28	0.96	1.9	90	100	100	105800000000000	4500000000000	LR_16_SZIV - 47	0.002145	13.81	0.2	13.9636	0.205362	14.0392	0.205894
LR_16_SZIV - 48	rim		18.181	16440	784	8590000	1859	2.151	0.021	0.01468	0.00076	0.002194	3e-05	0.11905	0.0485	0.0027	0.000716	8.4e-05	14.79	0.76	0.77	14.13	0.19	0.22	14.5	1.7	2.4	120	110	110	95800000000000	4500000000000	LR_16_SZIV - 48	0.002194	14.13	0.22	14.2965	0.225887	14.3672	0.22635
LR_16_SZIV - 49	rim of 50		35.15	9990	469	4960000	1070	2.45	0.11	0.01467	0.00074	0.002243	2.7e-05	0.097497	0.0474	0.0024	0.000717	7.6e-05	14.79	0.74	0.76	14.44	0.17	0.2	14.5	1.5	2.2	81	98	98	56000000000000	5500000000000	LR_16_SZIV - 49	0.002243	14.44	0.2	14.6617	0.209119	14.7376	0.209598
LR_16_SZIV - 50	rim of 49		27.635	10560	488	5200000	1126	1.157	0.016	0.01428	0.00055	0.002197	2e-05	0.2209	0.0471	0.0018	0.000689	5.1e-05	14.4	0.55	0.58	14.14	0.13	0.16	13.9	1	1.9	67	76	76	62200000000000	4200000000000	LR_16_SZIV - 50	0.002197	14.14	0.16	14.3472	0.168959	14.4273	0.169576
LR_16_SZIV - 51	core of 53		35.15	4550	206	2340000	507	2.02	0.1	0.0135	0.001	0.002149	3.2e-05	-0.14915	0.0456	0.0037	0.000709	9e-05	13.6	1	1	13.84	0.21	0.23	14.3	1.8	2.4	0	150	150	25600000000000	1600000000000	LR_16_SZIV - 51	0.002149	13.84	0.23	14.1251	0.243181	14.1963	0.243629
LR_16_SZIV - 52	rim		10.909	7380	349	3860000	836	1.966	0.036	0.0145	0.0018	0.002185	5.1e-05	0.3555	0.0483	0.0057	0.0008	0.00013	14.6	1.8	1.8	14.07	0.33	0.34	16.1	2.5	3.1	110	230	230	43100000000000	2500000000000	LR_16_SZIV - 52	0.002185	14.07	0.34	14.3106	0.349989	14.3834	0.35029
LR_16_SZIV - 53	rim of 51		35.15	6450	295	3250000	705	1.854	0.065	0.01361	0.00073	0.002161	3.6e-05	-0.11195	0.0459	0.0027	0.000717	8.2e-05	13.73	0.74	0.75	13.91	0.23	0.25	14.5	1.7	2.3	20	110	110	36100000000000	1500000000000	LR_16_SZIV - 53	0.002161	13.91	0.25	14.1644	0.260841	14.2429	0.261254
LR_16_SZIV - 54	rim		35.15	11130	525	5680000	1232	2.833	0.029	0.01435	0.00058	0.002156	2.7e-05	0.021891	0.0479	0.0019	0.000761	6e-05	14.47	0.58	0.6	13.88	0.17	0.2	15.4	1.2	2.1	99	80	80	60700000000000	4500000000000	LR_16_SZIV - 54	0.002156	13.88	0.2	14.0856	0.208205	14.162	0.208725
LR_16_SZIV - 55	inner part		14.302	5080	248	2290000	497	1.568	0.063	0.0153	0.0016	0.002237	3.6e-05	0.10333	0.0496	0.0054	0.00094	0.00012	15.4	1.6	1.7	14.4	0.23	0.25	19	2.5	3.3	210	220	220	27500000000000	1800000000000	LR_16_SZIV - 55	0.002237	14.4	0.25	14.6897	0.263077	14.767	0.263459
LR_16_SZIV - 56	rim		19.393	11580	560	5700000	1238	1.38	0.017	0.01432	0.00077	0.002146	3.4e-05	0.5667	0.0485	0.0022	0.00069	5.3e-05	14.43	0.77	0.79	13.82	0.22	0.24	13.9	1.1	1.9	127	95	95	65400000000000	1700000000000	LR_16_SZIV - 56	0.002146	13.82	0.24	14.0179	0.247522	14.0898	0.247964
LR_16_SZIV - 57	rim	disc.	35.15	3940	530	1660000	361	2.677	0.031	0.0493	0.0068	0.002534	6.2e-05	0.76136	0.138	0.017	0.00242	0.00035	49.6	6.7	6.7	16.32	0.4	0.41	48.9	7.1	9	2050	240	240	21500000000000	1400000000000	LR_16_SZIV - 57	0.002534	16.32	0.41	16.6754	0.426337	16.7424	0.426521
LR_16_SZIV - 58	rim	disc.	35.092	6260	363	3070000	667	1.601	0.039	0.0171	0.0011	0.002217	3.8e-05	-0.14097	0.0566	0.0037	0.000827	6.4e-05	17.2	1.1	1.1	14.28	0.25	0.26	16.7	1.3	2.3	470	140	140	35600000000000	1600000000000	LR_16_SZIV - 58	0.002217	14.28	0.26	14.5425	0.271195	14.611	0.271573
LR_16_SZIV - 59	rim of 60	disc.	34.18	2256	490	824000	179	1.94	0.027	0.0901	0.0093	0.002975	9.2e-05	0.65259	0.218	0.02	0.00387	0.00049	87.2	8.7	8.8	19.15	0.59	0.6	77.9	9.9	13	2910	150	150	12650000000000	720000000000	LR_16_SZIV - 59	0.002975	19.15	0.6	19.6359	0.62466	19.7077	0.624751
LR_16_SZIV - 60	core of 59	old	17.696	81270	4720	1037000	225.5	2.832	0.045	0.648	0.012	0.08017	0.00096	0.047493	0.0588	0.0014	0.02396	0.00087	508.7	6.9	8	497.1	5.7	6.5	478	17	56	555	53	53	416400000000000	4000000000000	LR_16_SZIV - 60	0.08017	497.1	6.5	498.163	6.54196	498.229	6.54196
synth Zircon blank - 6			35.083	3	1.4	101	0.0209	no value	NAN	no value	NAN	no value	NAN	NaN	no value	NAN	no value	NAN	no value	NAN	NAN	no value	NAN	NAN	no value	NAN	NAN	no value	NAN	NAN	no value	NAN	synth Zircon blank - 6
synth Zircon blank - 7			35.056	0.6	-0.5	94	0.0199	no value	NAN	no value	NAN	no value	NAN	NaN	no value	NAN	no value	NAN	no value	NAN	NAN	no value	NAN	NAN	no value	NAN	NAN	no value	NAN	NAN	no value	NAN	synth Zircon blank - 7
synth Zircon blank - 8			35.037	2.6	2.2	123	0.0265	no value	NAN	no value	NAN	no value	NAN	NaN	no value	NAN	no value	NAN	no value	NAN	NAN	no value	NAN	NAN	no value	NAN	NAN	no value	NAN	NAN	no value	NAN	synth Zircon blank - 8
synth Zircon blank - 9			35.067	0.3	2	100	0.0221	no value	NAN	no value	NAN	no value	NAN	NaN	no value	NAN	no value	NAN	no value	NAN	NAN	no value	NAN	NAN	no value	NAN	NAN	no value	NAN	NAN	no value	NAN	synth Zircon blank - 9
synth Zircon blank - 10			35.053	2.4	3	52	0.0117	no value	NAN	no value	NAN	no value	NAN	NaN	no value	NAN	no value	NAN	no value	NAN	NAN	no value	NAN	NAN	no value	NAN	NAN	no value	NAN	NAN	no value	NAN	synth Zircon blank - 10
Session20191204
Comments			Duration(s)	Pb206_CPS	Pb207_CPS	U238_CPS	Approx_U_PPM	FInal_U_Th_Ratio	FInal_U_Th_Ratio_Int2SE	Final207_235	Final207_235_Prop2SE	Final206_238	Final206_238_Prop2SE	ErrorCorrelation_6_38vs7_35	Final207_206	Final207_206_Prop2SE	Final208_232	Final208_232_Prop2SE	FinalAge207_235	FinalAge207_235_Int2SE	FinalAge207_235_Prop2SE	FinalAge206_238	FinalAge206_238_Int2SE	FinalAge206_238_Prop2SE	FinalAge208_232	FinalAge208_232_Int2SE	FinalAge208_232_Prop2SE	FinalAge207_206	FinalAge207_206_Int2SE	FinalAge207_206_Prop2SE			Comments	Final206_238	FinalAge206_238	FinalAge206_238_Prop2SE	CorrectedAge	CorrectedAge_2SE	Th_corrected_Age	Th_corrected_Age_2SE	logDose
AUSZ8-10 - 1			26.747	717	86	3440000	133.3	1.1728	0.0065	0.00348	0.00073	0.000214	1.6e-05	-0.031362	0.114	0.025	9e-05	2.4e-05	3.52	0.74	0.74	1.38	0.1	0.1	1.81	0.49	0.49	1860	430	430			AUSZ8-10 - 1	0.000214	1.38	0.1	1.413	0.149116	1.486	0.149748	14.8579
AUSZ8-10 - 2			26.512	808	95	3440000	195.3	1.1655	0.0086	0.00412	0.00077	0.000248	1.9e-05	0.023214	0.134	0.027	0.000118	2.9e-05	4.17	0.8	0.78	1.6	0.12	0.12	2.38	0.59	0.59	1800	410	410			AUSZ8-10 - 2	0.000248	1.6	0.12	1.646	0.179132	1.719	0.179657	15.0805
AUSZ8-10 - 3			26.126	804	84	3600000	149.2	1.1427	0.0064	0.00339	0.00066	0.000237	1.6e-05	0.29856	0.102	0.018	7.6e-05	2.3e-05	3.43	0.66	0.66	1.53	0.1	0.11	1.53	0.47	0.47	1470	360	360			AUSZ8-10 - 3	0.000237	1.53	0.11	1.564	0.148973	1.637	0.149605	14.9527
AUSZ8-10 - 4			26.562	630	65	2750000	66.1	1.373	0.01	0.00316	0.00081	0.000238	1.6e-05	-0.18962	0.104	0.028	9.9e-05	3.4e-05	3.2	0.81	0.81	1.54	0.1	0.1	2	0.68	0.69	1180	580	580			AUSZ8-10 - 4	0.000238	1.54	0.1	1.561	0.147017	1.634	0.147658	14.5902
AUSZ8-10 - 5			26.613	747	50	3020000	92.2	1.306	0.011	0.0024	0.00062	0.000264	1.7e-05	-0.26358	0.072	0.02	8.9e-05	3.1e-05	2.43	0.62	0.63	1.7	0.1	0.11	1.81	0.61	0.62	680	560	560			AUSZ8-10 - 5	0.000264	1.7	0.11	1.735	0.156925	1.808	0.157525	14.7791
AUSZ8-10 - 6			26.562	619	88	2730000	75.8	1.37	0.012	0.0046	0.0009	0.000233	1.7e-05	-0.025424	0.137	0.029	9.4e-05	3.1e-05	4.65	0.9	0.91	1.5	0.11	0.11	1.91	0.61	0.62	1840	480	480			AUSZ8-10 - 6	0.000233	1.5	0.11	1.532	0.156938	1.605	0.157538	14.6393
AUSZ8-10 - 7			19.754	821	64	3750000	209	1.1182	0.0089	0.00249	0.00056	0.000232	1.4e-05	0.24837	0.079	0.019	0.000104	2.7e-05	2.52	0.57	0.57	1.498	0.089	0.091	2.1	0.53	0.54	810	520	520			AUSZ8-10 - 7	0.000232	1.498	0.091	1.53	0.13039	1.603	0.131112	15.0882
AUSZ8-10 - 8			26.411	758	103	3380000	95.6	1.1324	0.0072	0.00428	0.00082	0.000229	1.7e-05	-0.11541	0.137	0.03	9.4e-05	2.8e-05	4.33	0.83	0.83	1.47	0.11	0.11	1.9	0.58	0.56	2050	400	400			AUSZ8-10 - 8	0.000229	1.47	0.11	1.508	0.15763	1.582	0.158227	14.7395
AUSZ8-10 - 9			26.495	760	56	3360000	134.6	1.1442	0.0081	0.00251	0.00075	0.000232	2e-05	-0.053356	0.086	0.028	0.000105	3e-05	2.54	0.75	0.76	1.49	0.13	0.13	2.13	0.6	0.61	800	620	620			AUSZ8-10 - 9	0.000232	1.49	0.13	1.539	0.188153	1.612	0.188653	14.8983
LR35_SZVG - 1	La inclusion	interior	17.441	36100	1780	16770000	1050	2.813	0.097	0.0145	0.0011	0.002165	3.9e-05	-0.0085925	0.0486	0.0038	0.000768	7.4e-05	14.6	1	1.1	13.94	0.16	0.25	15.5	1.2	1.5	110	140	150			LR35_SZVG - 1	0.002165	13.94	0.25	14.179	0.365568	14.252	0.365822	16.71
LR35_SZVG - 2		rim	26.517	69100	3360	32800000	2010	2.335	0.039	0.0144	0.0012	0.00218	2.9e-05	0.20241	0.0488	0.0034	0.000672	3.3e-05	14.5	1.2	1.2	14.04	0.14	0.19	13.57	0.58	0.66	70	100	100			LR35_SZVG - 2	0.00218	14.04	0.19	14.216	0.269996	14.289	0.270342	17.0022
LR35_SZVG - 3	short	rim	8.0086	66200	2970	34300000	2052	1.396	0.052	0.01379	0.00057	0.00216	3.9e-05	-0.15872	0.0465	0.0017	0.000662	2.9e-05	13.9	0.88	0.57	13.91	0.18	0.25	13.38	0.79	0.59	20	150	75			LR35_SZVG - 3	0.00216	13.91	0.25	14.149	0.366341	14.222	0.366594	17.0325
LR35_SZVG - 4		rim	26.339	23890	1159	11130000	640	1.745	0.017	0.01439	0.00076	0.002207	3.7e-05	0.073684	0.0464	0.0022	0.000669	4.9e-05	14.5	0.74	0.76	14.21	0.21	0.24	13.51	0.92	0.99	40	110	110			LR35_SZVG - 4	0.002207	14.21	0.24	14.425	0.34455	14.498	0.344819	16.5238
LR35_SZVG - 5		rim	13.704	11660	561	4680000	257	2.519	0.039	0.0166	0.0024	0.002433	8e-05	-0.15329	0.0494	0.0069	0.00078	0.00013	16.7	2.1	2.3	15.67	0.49	0.52	15.7	2.3	2.5	120	270	280			LR35_SZVG - 5	0.002433	15.67	0.52	16.063	0.755476	16.136	0.755593	16.1543
LR35_SZVG - 6		rim	10.678	39510	1850	17230000	897.6	1.445	0.012	0.01397	0.00065	0.002161	3.3e-05	0.049487	0.0468	0.0021	0.000645	3.1e-05	14.08	0.86	0.65	13.92	0.26	0.21	13.03	0.87	0.62	40	130	100			LR35_SZVG - 6	0.002161	13.92	0.21	14.114	0.307516	14.187	0.307819	16.6726
LR35_SZVG - 7	disc, inclusion	interior	26.339	32800	2720	14400000	715	1.566	0.015	0.0286	0.0086	0.002313	8.2e-05	0.95792	0.085	0.022	0.00106	0.00034	28.4	7.3	8.3	14.89	0.44	0.53	21.5	4.7	6.9	1220	350	360			LR35_SZVG - 7	0.002313	14.89	0.53	15.387	0.79188	15.46	0.79199	16.5988
LR35_SZVG - 8		rim	7.6527	40600	2030	21740000	1017	3.606	0.071	0.0145	0.0011	0.002186	3.5e-05	0.62867	0.0495	0.0032	0.00065	0.00011	15.1	1.3	1.1	14.07	0.33	0.23	13.2	2.2	2.2	160	160	140			LR35_SZVG - 8	0.002186	14.07	0.23	14.288	0.326735	14.361	0.327019	16.6944
LR35_SZVG - 9	disc, inclusion	rim	26.415	77700	4450	35600000	1546	2.52	0.022	0.01746	0.00064	0.00222	2.9e-05	0.14439	0.0562	0.002	0.000861	4.2e-05	17.58	0.6	0.64	14.29	0.15	0.19	17.39	0.66	0.84	481	76	76			LR35_SZVG - 9	0.00222	14.29	0.19	14.475	0.269854	14.548	0.2702	16.8944
LR35_SZVG - 10		rim	15.483	52000	2460	22740000	841	1.649	0.055	0.01433	0.0005	0.00221	3.2e-05	-0.052227	0.047	0.0018	0.000694	3.7e-05	14.44	0.57	0.5	14.23	0.18	0.21	14.03	0.81	0.74	49	99	83			LR35_SZVG - 10	0.00221	14.23	0.21	14.422	0.297595	14.495	0.297908	16.6474
LR35_SZVG - 11		rim	26.161	7470	345	3270000	112.5	2.689	0.03	0.0148	0.0017	0.002315	4.2e-05	0.11962	0.0461	0.0052	0.00063	0.0001	14.9	1.7	1.7	14.9	0.24	0.27	12.8	2	2.1	10	210	210			LR35_SZVG - 11	0.002315	14.9	0.27	15.072	0.383514	15.145	0.383756	15.7729
LR35_SZVG - 12	inclusion	rim	7.1188	34400	1730	17600000	500	3.08	0.054	0.0154	0.00097	0.002264	3.7e-05	-0.21741	0.05	0.0032	0.00074	7.7e-05	15.5	1.3	0.97	14.58	0.29	0.24	14.9	2.4	1.6	180	210	140			LR35_SZVG - 12	0.002264	14.58	0.24	14.783	0.343189	14.856	0.34346	16.4066
LR35_SZVG - 13		rim	17.263	44300	2100	21440000	602.6	1.884	0.057	0.0143	0.00085	0.002195	2.6e-05	0.24376	0.0471	0.0024	0.00074	4.6e-05	14.41	0.81	0.85	14.13	0.14	0.17	14.96	0.88	0.94	50	110	110			LR35_SZVG - 13	0.002195	14.13	0.17	14.282	0.239823	14.355	0.240213	16.4926
LR35_SZVG - 14		rim	16.373	82000	3930	36360000	1012	2.155	0.035	0.01439	0.00042	0.002196	2.6e-05	0.19118	0.0472	0.0012	0.000678	3.5e-05	14.51	0.44	0.42	14.14	0.16	0.17	13.69	0.7	0.7	58	70	58			LR35_SZVG - 14	0.002196	14.14	0.17	14.298	0.240893	14.371	0.241281	16.7122
LR35_SZVG - 15	inclusion	rim	25.628	97300	4440	44100000	1219	2.106	0.017	0.01419	0.0004	0.00224	2.8e-05	0.13176	0.0457	0.0012	0.000731	3.6e-05	14.31	0.38	0.4	14.42	0.15	0.18	14.76	0.56	0.73	-13	58	57			LR35_SZVG - 15	0.00224	14.42	0.18	14.596	0.260064	14.669	0.260423	16.8027
LR35_SZVG - 16		rim	8.3645	86300	4020	44540000	1226	2.623	0.035	0.01451	0.00051	0.002177	3e-05	0.35166	0.0473	0.0018	0.000671	5.4e-05	14.63	0.74	0.51	14.02	0.25	0.19	13.6	1.3	1.1	59	81	82			LR35_SZVG - 16	0.002177	14.02	0.19	14.203	0.279275	14.276	0.279609	16.7839
LR35_SZVG - 17		interior	14.949	66020	3310	32800000	899	2.432	0.025	0.01495	0.00046	0.002161	2.6e-05	0.097424	0.0493	0.0015	0.000707	4e-05	15.07	0.73	0.46	13.91	0.17	0.17	14.3	1	0.81	170	110	75			LR35_SZVG - 17	0.002161	13.91	0.17	14.071	0.240717	14.144	0.241105	16.6486
LR35_SZVG - 18		rim	22.246	25200	1197	11930000	326	1.687	0.047	0.01462	0.00095	0.002218	4e-05	0.38646	0.0482	0.0031	0.000703	4.2e-05	14.74	0.95	0.95	14.28	0.24	0.26	14.19	0.76	0.84	90	130	130			LR35_SZVG - 18	0.002218	14.28	0.26	14.487	0.370207	14.56	0.370458	16.2356
LR35_SZVG - 19	disc, inclusion	rim	19.399	30100	1550	14300000	392	1.599	0.053	0.01564	0.00077	0.002217	3.5e-05	-0.18217	0.051	0.0027	0.000741	5.3e-05	15.76	0.87	0.77	14.28	0.21	0.23	15	1.2	1.1	250	120	110			LR35_SZVG - 19	0.002217	14.28	0.23	14.462	0.323537	14.535	0.323824	16.3178
LR35_SZVG - 20	La inclusion	rim	26.517	58500	2860	28100000	769	2.904	0.021	0.01454	0.00056	0.002177	3.3e-05	0.1807	0.048	0.0019	0.00071	4e-05	14.65	0.53	0.56	14.02	0.19	0.21	14.34	0.7	0.8	94	83	83			LR35_SZVG - 20	0.002177	14.02	0.21	14.212	0.306823	14.285	0.307127	16.5777
LR35_SZVG - 21		rim	18.509	42300	2020	19180000	527	3.801	0.04	0.01442	0.00062	0.00216	2.9e-05	0.26031	0.0474	0.002	0.000686	4.6e-05	14.53	0.74	0.62	13.91	0.17	0.19	13.9	1	0.94	90	110	92			LR35_SZVG - 21	0.00216	13.91	0.19	14.069	0.267645	14.142	0.267994	16.4027
LR35_SZVG - 22		rim	10.322	99100	4620	51500000	1420	2.092	0.046	0.01434	0.00043	0.00217	2.5e-05	0.08553	0.0473	0.0014	0.000738	3.1e-05	14.46	0.61	0.43	13.97	0.21	0.16	14.92	0.89	0.62	60	110	64			LR35_SZVG - 22	0.00217	13.97	0.16	14.128	0.231898	14.201	0.232301	16.8548
LR35_SZVG - 23	La inclusion	rim	19.221	76400	3670	33600000	931	2.899	0.032	0.01474	0.00076	0.002228	2.8e-05	0.14586	0.0476	0.0024	0.000741	6.2e-05	14.85	0.75	0.76	14.35	0.14	0.18	15	1.2	1.2	70	110	110			LR35_SZVG - 23	0.002228	14.35	0.18	14.515	0.259582	14.588	0.259942	16.6708
LR35_SZVG - 24		rim	26.339	42240	2031	19240000	566	1.248	0.033	0.01467	0.00066	0.002218	3.3e-05	0.10661	0.0476	0.0019	0.000719	3.6e-05	14.79	0.64	0.66	14.28	0.19	0.21	14.54	0.58	0.73	92	91	91			LR35_SZVG - 24	0.002218	14.28	0.21	14.471	0.306029	14.544	0.306334	16.4936
LR35_SZVG - 25		interior	25.45	25700	1280	11990000	356	1.353	0.016	0.01484	0.00075	0.002221	3e-05	-0.14896	0.0489	0.0027	0.000679	4.7e-05	14.95	0.75	0.75	14.3	0.14	0.19	13.72	0.86	0.94	130	120	120			LR35_SZVG - 25	0.002221	14.3	0.19	14.459	0.276046	14.532	0.276384	16.287
LR35_SZVG - 26		rim	15.839	50580	2440	24230000	725	2.575	0.035	0.01406	0.00075	0.002191	3.7e-05	0.31348	0.0472	0.0026	0.000728	7e-05	14.17	0.74	0.75	14.11	0.2	0.24	14.7	1.4	1.4	50	120	120			LR35_SZVG - 26	0.002191	14.11	0.24	14.325	0.34494	14.398	0.345209	16.5592
LR35_SZVG - 27		rim	16.017	24310	1246	11490000	347	2.395	0.021	0.01577	0.00098	0.002254	4.2e-05	0.11573	0.052	0.0032	0.000718	7.5e-05	15.89	0.97	0.98	14.51	0.26	0.27	14.5	1.5	1.5	260	140	140			LR35_SZVG - 27	0.002254	14.51	0.27	14.731	0.389292	14.804	0.389529	16.2536
LR35_SZVG - 28		interior	20.822	14800	736	7160000	218.2	1.321	0.028	0.01507	0.00072	0.002196	4.6e-05	-0.13963	0.0499	0.0032	0.000755	5.5e-05	15.18	0.76	0.72	14.14	0.25	0.3	15.2	1.4	1.1	170	120	140			LR35_SZVG - 28	0.002196	14.14	0.3	14.358	0.425443	14.431	0.42566	16.0717
LR35_SZVG - 29	bad, inclusion	rim	26.517	40600	2170	18500000	571	2.564	0.048	0.01672	0.00064	0.002236	3.5e-05	0.18177	0.0533	0.002	0.00088	4.8e-05	16.83	0.59	0.64	14.4	0.19	0.23	17.78	0.84	0.98	354	83	84			LR35_SZVG - 29	0.002236	14.4	0.23	14.596	0.324765	14.669	0.325052	16.4639
LR35_SZVG - 30		rim	27.051	23200	1160	10500000	330	2.049	0.019	0.01528	0.0012	0.002272	4.6e-05	-0.16623	0.049	0.0041	0.00074	8.8e-05	15.4	0.72	1.2	14.63	0.16	0.29	14.9	1.1	1.8	150	110	180			LR35_SZVG - 30	0.002272	14.63	0.29	14.866	0.427292	14.939	0.427508	16.2409
LR35_SZVG - 31	disc, inclusion	rim	8.3645	42400	2370	20900000	660	0.966	0.076	0.0168	0.001	0.002243	6.6e-05	0.25653	0.0554	0.0029	0.000772	4.6e-05	16.9	1.2	1	14.45	0.42	0.43	15.6	0.97	0.93	420	130	120			LR35_SZVG - 31	0.002243	14.45	0.43	14.837	0.630096	14.91	0.630239	16.5887
LR35_SZVG - 32		rimof33	6.9408	33610	1640	17600000	558	2.439	0.023	0.0146	0.0014	0.002186	4.1e-05	-0.020876	0.0485	0.0049	0.00078	0.00012	14.7	1.4	1.4	14.08	0.34	0.27	15.8	2.2	2.3	110	220	220			LR35_SZVG - 32	0.002186	14.08	0.27	14.307	0.382346	14.38	0.382588	16.4463
LR35_SZVG - 33		rimof32	16.017	91100	4330	43600000	1391	1.2095	0.0064	0.01419	0.00055	0.002174	2.5e-05	-0.075268	0.0474	0.0017	0.000694	2.8e-05	14.31	0.64	0.55	14	0.16	0.16	14.01	0.51	0.57	70	110	79			LR35_SZVG - 33	0.002174	14	0.16	14.154	0.231926	14.227	0.232329	16.8788
LR35_SZVG - 34		rim	10.5	61300	2770	27200000	870	2.61	0.11	0.0139	0.001	0.002177	6.6e-05	0.39248	0.0463	0.0029	0.00078	8.5e-05	14.1	1	1	14.02	0.4	0.43	15.8	1.6	1.7	20	130	130			LR35_SZVG - 34	0.002177	14.02	0.43	14.418	0.632062	14.491	0.632204	16.6353
LR35_SZVG - 35		rim	18.865	50500	2300	23800000	765	2.58	0.21	0.01407	0.00079	0.00218	7.9e-05	-0.12755	0.0466	0.0024	0.000725	4.6e-05	14.18	0.82	0.8	14.04	0.21	0.51	14.64	0.77	0.92	50	130	110			LR35_SZVG - 35	0.00218	14.04	0.51	14.511	0.763731	14.584	0.763846	16.5834
LR35_SZVG - 36		rim	17.085	97700	4710	47000000	1516	2.612	0.028	0.01474	0.00047	0.002214	2.9e-05	0.069406	0.048	0.0015	0.000701	5e-05	14.86	0.36	0.47	14.25	0.14	0.19	14.16	0.71	1	109	66	70			LR35_SZVG - 36	0.002214	14.25	0.19	14.436	0.269858	14.509	0.270204	16.8835
LR35_SZVG - 37		interior	26.517	121400	5710	54740000	1766	8.737	0.085	0.01462	0.0004	0.00226	2.7e-05	0.06705	0.0466	0.0012	0.000715	5.3e-05	14.74	0.36	0.4	14.55	0.13	0.17	14.45	0.98	1.1	33	54	55			LR35_SZVG - 37	0.00226	14.55	0.17	14.719	0.250728	14.792	0.2511	16.9332
LR35_SZVG - 38		rim	20.288	29610	1460	13390000	470.8	2.026	0.052	0.0151	0.00089	0.002192	4e-05	-0.15598	0.0497	0.0036	0.000738	5.3e-05	15.2	1.2	0.9	14.12	0.28	0.26	14.9	1.1	1.1	150	170	150			LR35_SZVG - 38	0.002192	14.12	0.26	14.334	0.371995	14.407	0.372244	16.3825
LR35_SZVG - 39		rim	26.695	45600	2120	20300000	744	2.342	0.031	0.01485	0.00058	0.002295	3.1e-05	-0.075036	0.0459	0.0017	0.000746	4.7e-05	14.97	0.55	0.58	14.78	0.17	0.2	15.07	0.83	0.95	-3	76	76			LR35_SZVG - 39	0.002295	14.78	0.2	14.96	0.287434	15.033	0.287758	16.5944
LR35_SZVG - 40	short	rim	6.2289	19860	946	10050000	394	2.579	0.054	0.0149	0.0012	0.002276	7e-05	0.73149	0.0488	0.0021	0.00073	0.00011	15	1.5	1.2	14.65	0.46	0.45	14.7	2.5	2.2	130	130	100			LR35_SZVG - 40	0.002276	14.65	0.45	15.031	0.663165	15.104	0.6633	16.3111
LR35_SZVG - 41		rim	20.288	14800	780	7460000	300	3.26	0.14	0.0157	0.0015	0.002211	4.9e-05	0.17237	0.0514	0.0048	0.000667	7.4e-05	15.8	1.3	1.5	14.24	0.26	0.31	13.5	1.3	1.5	220	170	200			LR35_SZVG - 41	0.002211	14.24	0.31	14.481	0.455521	14.554	0.455723	16.1718
LR35_SZVG - 42	La inclusion	rim	26.339	32700	1600	15160000	623	2.032	0.063	0.01469	0.00059	0.002158	5.7e-05	-0.11462	0.0494	0.0023	0.000689	4.4e-05	14.81	0.66	0.59	13.9	0.17	0.36	13.91	0.85	0.9	150	100	100			LR35_SZVG - 42	0.002158	13.9	0.36	14.225	0.539661	14.298	0.53983	16.4967
LR35_SZVG - 43		rim	26.695	15310	758	6800000	284	1.995	0.022	0.0156	0.0012	0.002311	3.4e-05	-0.079067	0.0486	0.0037	0.000748	7.5e-05	15.7	1.1	1.2	14.88	0.21	0.22	15.1	1.4	1.5	130	150	150			LR35_SZVG - 43	0.002311	14.88	0.22	15.05	0.312556	15.123	0.312854	16.1861
LR35_SZVG - 44	La inclusion	rim	22.958	49500	2280	22400000	942	2.412	0.037	0.01473	0.00088	0.002249	3.3e-05	0.015396	0.0478	0.0028	0.000707	4.8e-05	14.84	0.69	0.88	14.48	0.13	0.21	14.28	0.78	0.96	80	100	130			LR35_SZVG - 44	0.002249	14.48	0.21	14.681	0.307228	14.754	0.307531	16.6868
LR35_SZVG - 45	La inclusion	rim	15.839	88900	4330	39800000	1687	2.197	0.017	0.01453	0.00047	0.002165	2.7e-05	0.5202	0.0486	0.0014	0.000704	3.7e-05	14.65	0.58	0.47	13.94	0.2	0.18	14.23	0.91	0.75	124	74	62			LR35_SZVG - 45	0.002165	13.94	0.18	14.108	0.251002	14.181	0.251374	16.9281
LR35_SZVG - 46		interior	26.339	23800	1060	10200000	435	1.472	0.014	0.01516	0.00085	0.002348	3.6e-05	0.36599	0.0469	0.0024	0.000742	5.4e-05	15.28	0.83	0.85	15.12	0.2	0.23	15	1	1.1	60	110	110			LR35_SZVG - 46	0.002348	15.12	0.23	15.317	0.333235	15.39	0.333514	16.3987
LR35_SZVG - 47	age zoned (first part)	interior	10.678	52400	2560	27100000	1150	1.53	0.013	0.0143	0.0013	0.002189	5.1e-05	0.70263	0.0465	0.0036	0.000683	5.3e-05	14.5	1.2	1.3	14.1	0.27	0.33	13.8	1	1.1	60	140	160			LR35_SZVG - 47	0.002189	14.1	0.33	14.412	0.48351	14.485	0.483699	16.7852
LR35_SZVG - 48		interior	14.593	16980	832	8130000	343	2.008	0.016	0.0152	0.0014	0.002252	3.7e-05	0.18381	0.0485	0.0045	0.000721	8.1e-05	15.3	1.4	1.4	14.5	0.21	0.24	14.6	1.6	1.6	100	190	190			LR35_SZVG - 48	0.002252	14.5	0.24	14.692	0.341783	14.765	0.342055	16.2582
LR35_SZVG - 49		rim	8.1866	55150	2560	27390000	1145	2.392	0.042	0.0139	0.00077	0.002163	3.2e-05	0.76414	0.047	0.0023	0.000671	4.9e-05	14.02	0.72	0.77	13.93	0.3	0.21	13.6	1.2	0.99	50	71	97			LR35_SZVG - 49	0.002163	13.93	0.21	14.124	0.298361	14.197	0.298674	16.7567
LR35_SZVG - 50	La inclusion	rim	17.441	43000	2060	20100000	728	2.669	0.042	0.01473	0.00063	0.002232	3.2e-05	0.19476	0.0471	0.0021	0.000749	4.2e-05	14.84	0.91	0.63	14.37	0.23	0.2	15.1	1	0.84	50	140	91			LR35_SZVG - 50	0.002232	14.37	0.2	14.56	0.297023	14.633	0.297337	16.5716
LR35_SZVG - 51		rim	11.39	52780	2560	26900000	953	1.821	0.025	0.01443	0.00057	0.002169	3.2e-05	0.21417	0.048	0.0019	0.000678	3.7e-05	14.55	0.93	0.57	13.97	0.2	0.2	13.71	0.86	0.74	90	140	88			LR35_SZVG - 51	0.002169	13.97	0.2	14.161	0.298016	14.234	0.298329	16.6922
LR35_SZVG - 52		rim	26.695	41010	1893	18620000	647	2.488	0.026	0.01415	0.00072	0.002238	3e-05	-0.42057	0.0455	0.0026	0.000712	3.6e-05	14.27	0.69	0.72	14.41	0.16	0.19	14.38	0.62	0.73	0	120	120			LR35_SZVG - 52	0.002238	14.41	0.19	14.584	0.277672	14.657	0.278008	16.5227
LR35_SZVG - 53	disc, inclusion	rim	26.517	68100	4330	30400000	1038	2.744	0.057	0.0203	0.0014	0.002326	3.1e-05	0.78392	0.0629	0.004	0.001016	8.7e-05	20.4	1.5	1.4	14.97	0.17	0.2	20.5	1.7	1.8	650	130	130			LR35_SZVG - 53	0.002326	14.97	0.2	15.166	0.288121	15.239	0.288445	16.7416
LR35_SZVG - 54	La inclusion	rimof55	8.0086	42700	2090	21900000	736	3.327	0.031	0.0148	0.0012	0.002197	5.3e-05	0.26067	0.0485	0.0039	0.000739	8.3e-05	15	1.2	1.2	14.15	0.34	0.34	14.9	1.7	1.7	120	180	180			LR35_SZVG - 54	0.002197	14.15	0.34	14.459	0.500679	14.532	0.500862	16.5607
LR35_SZVG - 55		rimof54	10.144	65100	3140	32100000	1059	2.884	0.041	0.01509	0.00094	0.00228	5e-05	0.49465	0.048	0.0026	0.000756	5.9e-05	15.21	0.93	0.94	14.68	0.3	0.32	15.3	1.2	1.2	100	120	120			LR35_SZVG - 55	0.00228	14.68	0.32	14.988	0.472377	15.061	0.472571	16.7391
LR35_SZVG - 56	La inclusion		11.746	15220	732	7650000	248.2	1.204	0.018	0.0146	0.0012	0.002165	6.1e-05	-0.040829	0.0493	0.0046	0.000678	7.7e-05	14.8	1.3	1.2	13.94	0.25	0.39	13.7	1.6	1.5	180	210	210			LR35_SZVG - 56	0.002165	13.94	0.39	14.24	0.571533	14.313	0.571692	16.1315
LR35_SZVG - 57	Th/U changing	rimof58	14.415	79000	3900	36900000	1181	3.25	0.11	0.01543	0.00051	0.002261	3e-05	0.20508	0.0492	0.0017	0.000725	4.6e-05	15.54	0.66	0.51	14.56	0.16	0.19	14.6	1.2	0.92	151	93	76			LR35_SZVG - 57	0.002261	14.56	0.19	14.743	0.27896	14.816	0.279294	16.7784
LR35_SZVG - 58		rimof57	15.305	54000	2660	22570000	712	1.991	0.081	0.01588	0.00072	0.002332	3.9e-05	0.16324	0.0494	0.002	0.000811	5.8e-05	16	0.61	0.72	15.01	0.23	0.25	16.4	1	1.2	161	77	93			LR35_SZVG - 58	0.002332	15.01	0.25	15.246	0.363706	15.319	0.363961	16.5911
AUSZ7-1 - 1			26.596	15410	767	2690000	28.7	3.143	0.025	0.04	0.0029	0.00584	0.00012	0.11701	0.0495	0.0036	0.00199	0.00024	39.8	2.8	2.9	37.53	0.7	0.75	40.1	4.6	4.8	170	140	140			AUSZ7-1 - 1	0.00584	37.53	0.75	37.954	1.08945	38.027	1.08952	15.5808
AUSZ7-1 - 2			20.376	15550	834	2601000	119.2	3.138	0.029	0.0434	0.0043	0.00594	0.00013	0.21204	0.0527	0.0051	0.0019	0.00023	43.1	4.2	4.2	38.19	0.77	0.84	38.3	4.7	4.7	300	200	200			AUSZ7-1 - 2	0.00594	38.19	0.84	38.834	1.20476	38.907	1.20482	16.2032
AUSZ7-1 - 3			26.562	16900	836	2930000	152.1	3.033	0.018	0.0409	0.0028	0.005981	9.9e-05	-0.15384	0.0501	0.0037	0.00201	0.00017	40.7	2.8	2.7	38.44	0.55	0.63	40.5	3	3.5	160	150	160			AUSZ7-1 - 3	0.005981	38.44	0.63	38.964	0.912646	39.037	0.912738	16.31
AUSZ7-1 - 4			26.814	15250	746	2700000	103.1	3.143	0.022	0.04	0.0032	0.005929	0.00011	-0.19073	0.0492	0.0042	0.0019	0.00023	39.8	3.1	3.2	38.11	0.6	0.71	38.3	4.5	4.7	110	170	170			AUSZ7-1 - 4	0.005929	38.11	0.71	38.643	1.01209	38.716	1.01217	16.1388
AUSZ7-1 - 5			18.625	26720	1275	4470000	103.5	2.178	0.014	0.0393	0.0024	0.005864	7.9e-05	0.0063355	0.0482	0.0029	0.00181	0.00016	39.1	2.3	2.3	37.69	0.42	0.51	36.6	3.2	3.3	100	130	130			AUSZ7-1 - 5	0.005864	37.69	0.51	38.077	0.721561	38.149	0.721682	16.15
AUSZ7-1 - 6			22.462	16340	814	2950000	89.5	3.06	0.024	0.0401	0.0026	0.005826	0.00012	0.1108	0.0496	0.0032	0.00212	0.00029	39.9	2.5	2.5	37.45	0.63	0.76	42.7	5.6	5.8	200	140	140			AUSZ7-1 - 6	0.005826	37.45	0.76	38.012	1.1052	38.084	1.10527	16.0703
AUSZ7-1 - 7			26.411	16140	820	2830000	79.8	3.014	0.029	0.0395	0.0029	0.005874	7.9e-05	0.41964	0.0505	0.0034	0.00187	0.00022	39.3	2.8	2.8	37.76	0.46	0.5	37.8	4.3	4.5	210	150	150			AUSZ7-1 - 7	0.005874	37.76	0.5	38.116	0.71917	38.189	0.719292	16.0263
AUSZ7-1 - 8			26.814	15430	764	2730000	141.7	3.11	0.022	0.0399	0.0029	0.00583	0.00012	-0.11168	0.0501	0.0037	0.0019	0.0002	40.2	2.8	2.8	37.5	0.73	0.74	38.3	3.8	4.1	190	160	160			AUSZ7-1 - 8	0.00583	37.5	0.74	38.098	1.11232	38.17	1.11239	16.2692
AUSZ7-1 - 9			26.562	15310	778	2670000	74.5	3.118	0.026	0.0404	0.0026	0.005949	0.00011	0.034161	0.0496	0.0033	0.00195	0.00022	40.1	2.5	2.5	38.24	0.59	0.7	39.3	4.3	4.4	180	140	140			AUSZ7-1 - 9	0.005949	38.24	0.7	38.732	1.00766	38.804	1.00775	15.9981
AUSZ7-1 - 10			24.185	15080	733	2580000	106.5	3.146	0.028	0.0406	0.0025	0.005965	9.2e-05	0.1701	0.049	0.0028	0.00191	0.00025	40.4	2.4	2.4	38.34	0.48	0.59	38.5	4.9	5	150	130	130			AUSZ7-1 - 10	0.005965	38.34	0.59	38.789	0.842864	38.862	0.842966	16.1564
AUSZ7-5 - 1			26.529	906	99	2560000	47.5	1.545	0.011	0.00558	0.00085	0.000362	2.4e-05	0.20775	0.117	0.016	0.000159	3.8e-05	5.65	0.84	0.86	2.33	0.15	0.15	3.22	0.81	0.78	1760	300	300			AUSZ7-5 - 1	0.000362	2.33	0.15	2.375	0.220611	2.448	0.221037	14.6221
AUSZ7-5 - 2			26.261	946	107	2570000	109	1.556	0.012	0.0059	0.001	0.00038	2e-05	0.23725	0.113	0.019	0.000171	4.3e-05	5.9	1	1	2.45	0.13	0.13	3.45	0.87	0.87	1770	310	310			AUSZ7-5 - 2	0.00038	2.45	0.13	2.496	0.184574	2.569	0.185083	15.0014
AUSZ7-5 - 3			26.814	944	84	2620000	141.8	1.52	0.01	0.00455	0.00095	0.000385	2.8e-05	-0.08514	0.09	0.021	0.000122	3.5e-05	4.61	0.94	0.96	2.48	0.18	0.18	2.46	0.7	0.7	1080	460	460			AUSZ7-5 - 3	0.000385	2.48	0.18	2.553	0.263606	2.626	0.263962	15.1157
AUSZ7-5 - 4			26.227	906	77	2610000	103.7	1.548	0.013	0.00437	0.0009	0.00037	2e-05	0.057606	0.085	0.017	0.000171	4.8e-05	4.42	0.91	0.91	2.38	0.12	0.13	3.45	0.93	0.96	1070	450	450			AUSZ7-5 - 4	0.00037	2.38	0.13	2.43	0.184541	2.503	0.18505	14.9662
AUSZ7-5 - 5			26.814	886	94	2400000	56.4	1.6014	0.0092	0.00544	0.00092	0.000392	2.8e-05	0.14363	0.103	0.018	0.000143	4.7e-05	5.5	0.94	0.93	2.53	0.18	0.18	2.89	0.93	0.94	1580	370	370			AUSZ7-5 - 5	0.000392	2.53	0.18	2.579	0.259036	2.652	0.259398	14.7271
AUSZ7-5 - 6			26.831	856	90	2450000	74.6	1.582	0.013	0.0052	0.001	0.000363	2e-05	0.057268	0.105	0.022	0.000207	5e-05	5.3	1.1	1.1	2.34	0.13	0.13	4.2	1	1	1540	430	430			AUSZ7-5 - 6	0.000363	2.34	0.13	2.38	0.183759	2.453	0.184271	14.8141
AUSZ7-5 - 7			26.562	958	89	2550000	71.4	1.5376	0.0099	0.0048	0.001	0.00039	2.6e-05	-0.078401	0.09	0.02	0.000163	3.6e-05	4.9	1	1	2.51	0.17	0.17	3.29	0.72	0.72	1020	460	460			AUSZ7-5 - 7	0.00039	2.51	0.17	2.567	0.240747	2.64	0.241137	14.8296
AUSZ7-5 - 8			26.261	867	55	2340000	126.1	1.5718	0.0088	0.00346	0.0009	0.000383	2.6e-05	0.023166	0.07	0.019	0.000153	4.5e-05	3.5	0.96	0.91	2.47	0.16	0.16	3.09	0.9	0.91	440	550	550			AUSZ7-5 - 8	0.000383	2.47	0.16	2.532	0.243271	2.605	0.243657	15.0642
AUSZ7-5 - 9			26.16	881	83	2490000	70.1	1.538	0.01	0.00446	0.00095	0.000377	3.2e-05	0.20623	0.097	0.02	0.000157	4.8e-05	4.51	0.9	0.96	2.43	0.21	0.21	3.17	0.97	0.97	1290	430	430			AUSZ7-5 - 9	0.000377	2.43	0.21	2.494	0.299389	2.567	0.299701	14.8032
AUSZ7-5 - 10			26.411	846	77	2340000	95.3	1.591	0.012	0.00486	0.00082	0.000366	2.2e-05	-0.038023	0.088	0.015	0.000177	4.8e-05	4.92	0.82	0.83	2.36	0.14	0.14	3.57	0.94	0.96	1340	390	390			AUSZ7-5 - 10	0.000366	2.36	0.14	2.407	0.20356	2.48	0.204022	14.9261
GJ-1 - 1			17.957	959000	58600	9610000	310	29.59	0.42	0.826	0.013	0.09835	0.00096	0.19793	0.06058	0.00068	0.0323	0.0021	611.3	4.7	6.9	604.7	3.2	5.6	642	37	42	623	23	24			GJ-1 - 1	0.09835	604.7	5.6	604.706	7.822	604.773	7.82193	17.8131
GJ-1 - 2			12.211	1048000	63500	11610000	354	29.62	0.43	0.8137	0.018	0.09727	0.0012	0.53429	0.06007	0.00076	0.0316	0.0023	604.5	5.4	10	598.4	5	7.2	628	44	44	604	26	27			GJ-1 - 2	0.09727	598.4	7.2	597.238	9.76472	597.304	9.76462	17.8659
GJ-1 - 3			14.366	958000	58100	9520000	309	29.18	0.39	0.8165	0.015	0.0979	0.0011	0.24764	0.05971	0.00072	0.0298	0.0016	606	5.3	8.4	602.1	4.5	6.2	594	30	32	598	23	24			GJ-1 - 3	0.0979	602.1	6.2	602.122	8.96814	602.189	8.96806	17.8097
GJ-1 - 5			16.651	1009000	60900	9997000	319	29.89	0.39	0.81	0.015	0.0978	0.0011	0.43464	0.06008	0.00071	0.0319	0.0021	602.1	5.8	8.4	601.5	4.2	6.6	634	36	42	610	22	23			GJ-1 - 5	0.0978	601.5	6.6	601.288	8.9634	601.355	8.96331	17.8231
GJ-1 - 6			24.148	1061000	64300	11060000	325	29.75	0.24	0.808	0.012	0.09735	0.001	0.52971	0.06005	0.0005	0.0299	0.0017	601.2	4.3	6.6	598.8	3.8	6.1	595	29	32	604	16	18			GJ-1 - 6	0.09735	598.8	6.1	598.561	8.15027	598.627	8.15019	17.8291
GJ-1 - 7			27.166	954000	57900	10270000	319	29.82	0.21	0.8071	0.014	0.09763	0.0011	0.52074	0.0601	0.0006	0.0295	0.0015	600.7	4.5	7.9	600.5	3.5	6.5	588	23	30	605	20	22			GJ-1 - 7	0.09763	600.5	6.5	600.304	8.96506	600.37	8.96498	17.8223
GJ-1 - 8			27.166	959000	58000	10250000	323	30.06	0.24	0.8102	0.013	0.09853	0.001	0.53511	0.05991	0.00059	0.0315	0.0017	602.5	4.7	7.2	605.8	3.1	6.1	626	27	32	598	20	21			GJ-1 - 8	0.09853	605.8	6.1	605.444	8.1408	605.51	8.14073	17.8317
GJ-1 - 9			27.166	951000	57400	10050000	321	29.72	0.34	0.8033	0.015	0.09754	0.0011	0.59028	0.05994	0.00051	0.0297	0.0015	598.6	4.4	8.1	600	3.3	6.5	591	22	29	603	16	17			GJ-1 - 9	0.09754	600	6.5	599.731	8.96489	599.798	8.96481	17.8246
GJ-1 - 10			17.972	908000	54710	9150000	318.7	29.56	0.37	0.8055	0.011	0.09739	0.0011	0.42157	0.06037	0.00057	0.0288	0.0017	599.9	3.3	6.4	599.1	4	6.2	574	31	34	615	19	21			GJ-1 - 10	0.09739	599.1	6.2	598.922	8.96759	598.989	8.96751	17.8208
GJ-1 - 11			25.355	966000	58300	10290000	334	29.4	0.3	0.806	0.012	0.09771	0.00092	0.5284	0.06025	0.00059	0.02936	0.0013	600.1	5.3	6.9	601	3.7	5.4	585	18	25	611	20	21			GJ-1 - 11	0.09771	601	5.4	600.481	7.49329	600.547	7.49322	17.8426
GJ-1 - 12			28.524	943000	57900	10100000	315	29.82	0.24	0.8201	0.013	0.09855	0.001	0.5797	0.06051	0.00055	0.0305	0.0016	608	4.4	7.4	605.9	3.7	5.9	608	30	32	623	19	20			GJ-1 - 12	0.09855	605.9	5.9	605.746	8.14392	605.813	8.14385	17.8209
GJ-1 - 13			19.36	914000	55600	9230000	320	29.63	0.38	0.82	0.014	0.09856	0.0011	0.649	0.06054	0.00076	0.0296	0.0016	607.9	6.6	7.7	606	4.7	6.2	589	27	32	620	26	27			GJ-1 - 13	0.09856	606	6.2	605.659	8.95541	605.726	8.95532	17.8279
GJ-1 - 14			24.805	953000	58100	10080000	321	29.65	0.24	0.8106	0.014	0.09731	0.001	0.30378	0.06046	0.00068	0.03	0.0016	602.7	5	7.6	598.6	3.2	6.1	598	24	31	617	23	24			GJ-1 - 14	0.09731	598.6	6.1	598.42	8.15226	598.487	8.15219	17.8236
GJ-1 - 15			19.058	999500	60800	10910000	322	30.06	0.29	0.8136	0.014	0.09787	0.0012	0.52037	0.06027	0.00053	0.0308	0.0016	604.4	4.1	7.9	601.9	4.7	7	613	28	31	612	17	19			GJ-1 - 15	0.09787	601.9	7	601.59	9.77522	601.656	9.77513	17.8274
GJ-1 - 16			19.368	962000	58100	9800000	319	29.55	0.39	0.8153	0.013	0.0982	0.0011	0.40737	0.06021	0.00062	0.0292	0.0018	605.4	4.9	7.3	603.9	3.1	6.2	582	28	35	609	21	22			GJ-1 - 16	0.0982	603.9	6.2	603.602	8.95945	603.669	8.95937	17.8249
GJ-1 - 17			25.757	977000	58700	10310000	327	29.51	0.31	0.8062	0.012	0.09791	0.0011	0.54359	0.05975	0.00052	0.0303	0.0015	600.2	4.5	7.4	602.1	3.7	6.2	602	23	29	600	19	21			GJ-1 - 17	0.09791	602.1	6.2	601.721	8.95815	601.788	8.95806	17.8343
GJ-1 - 18			25.757	964000	58100	10190000	319	29.75	0.25	0.8176	0.013	0.09794	0.001	0.29408	0.06038	0.00075	0.0293	0.0015	606.6	4.9	7.3	602.3	3.4	6.1	583	25	30	619	25	26			GJ-1 - 18	0.09794	602.3	6.1	602.119	8.1476	602.186	8.14752	17.8237
GJ-1 - 19			25.757	951000	58000	10090000	321	29.56	0.32	0.8158	0.013	0.0979	0.0011	0.67299	0.06051	0.00058	0.0302	0.0016	605.6	5.3	7.5	602.1	4.3	6.4	602	25	31	620	19	21			GJ-1 - 19	0.0979	602.1	6.4	601.816	8.96136	601.882	8.96128	17.8262
GJ-1 - 20			25.757	954000	57800	10140000	322	29.39	0.26	0.8108	0.013	0.09732	0.0012	0.43762	0.06063	0.00057	0.03	0.0015	602.8	5.1	7.5	598.6	3.8	6.8	597	24	30	624	19	20			GJ-1 - 20	0.09732	598.6	6.8	598.411	9.78127	598.478	9.78118	17.8249
GJ-1 - 21			25.757	960000	57500	10130000	321	29.72	0.32	0.8069	0.014	0.09811	0.0012	0.61805	0.05969	0.0006	0.0308	0.0016	600.6	5.1	7.6	603.3	4.3	7	613	25	32	590	20	22			GJ-1 - 21	0.09811	603.3	7	603.005	9.77324	603.071	9.77315	17.8271
GJ-1 - 22			18.907	948000	57190	10570000	322	29.98	0.35	0.799	0.016	0.09718	0.0012	0.71407	0.05972	0.00065	0.0296	0.0017	596.4	6.5	9	597.8	4.8	6.9	590	28	33	592	23	24			GJ-1 - 22	0.09718	597.8	6.9	597.602	9.78281	597.668	9.78272	17.8243
GJ-1 - 23			26.519	957000	57900	10220000	319	29.83	0.2	0.8142	0.011	0.09786	0.001	0.34871	0.0604	0.00054	0.0309	0.0018	604.7	3.5	6.4	601.8	4.2	6.1	615	29	36	616	18	19			GJ-1 - 23	0.09786	601.8	6.1	601.656	8.1483	601.723	8.14823	17.8233
GJ-1 - 24			26.764	949000	57600	10090000	322	29.65	0.28	0.8148	0.013	0.09821	0.0011	0.43593	0.06028	0.00048	0.031	0.0017	605.1	4.1	7	603.9	3.5	6.2	618	28	33	612	16	17			GJ-1 - 24	0.09821	603.9	6.2	603.584	8.9578	603.65	8.95772	17.829
GJ-1 - 25			28.038	939000	57000	9890000	313	29.72	0.32	0.8154	0.013	0.09804	0.0011	0.63401	0.06014	0.00054	0.0295	0.0015	605.4	4.7	7.2	602.9	3.5	6.5	588	25	29	607	18	19			GJ-1 - 25	0.09804	602.9	6.5	602.831	8.96429	602.897	8.9642	17.8159
GJ-1 - 26			13.999	979000	59580	11150000	331	29.75	0.4	0.818	0.017	0.0983	0.0016	0.41198	0.0606	0.00068	0.0288	0.0017	606.6	6.5	9.3	604.3	6.6	9.1	574	30	33	623	23	24			GJ-1 - 26	0.0983	604.3	9.1	603.621	13.0132	603.688	13.0131	17.8412
GJ-1 - 27			15.633	982000	59400	10960000	316	29.89	0.3	0.808	0.015	0.09769	0.0012	0.59634	0.06016	0.00069	0.0301	0.0017	601.4	5.8	8.4	600.8	4.9	7.3	599	30	34	607	24	25			GJ-1 - 27	0.09769	600.8	7.3	600.717	9.78108	600.784	9.78099	17.8184
GJ-1 - 28			26.998	934000	56300	9810000	316	29.85	0.24	0.8104	0.013	0.09768	0.0011	0.37503	0.06011	0.0006	0.0303	0.0019	602.6	4.6	7.1	600.8	3.1	6.2	603	32	37	605	20	22			GJ-1 - 28	0.09768	600.8	6.2	600.67	8.96614	600.737	8.96606	17.8184
GJ-1 - 29			25.825	978000	58800	10270000	333	29.73	0.29	0.8108	0.013	0.09797	0.001	0.40156	0.05994	0.0005	0.031	0.0016	602.8	3.8	7.2	602.5	3.9	6	618	25	31	606	18	20			GJ-1 - 29	0.09797	602.5	6	601.968	8.14207	602.034	8.142	17.8425
GJ-1 - 30			17.361	943000	57100	9420000	317	29.61	0.27	0.8158	0.014	0.09817	0.0012	0.65681	0.06	0.0005	0.031	0.0016	605.6	5.4	7.9	603.6	5	7.1	617	31	32	602	17	18			GJ-1 - 30	0.09817	603.6	7.1	603.464	9.77518	603.53	9.77509	17.8219
GJ-1 - 31			26.831	970000	59200	10250000	320	29.91	0.25	0.8134	0.012	0.09764	0.001	0.61677	0.06061	0.00049	0.03	0.0018	604.2	4.5	6.8	600.5	3.1	6	598	30	35	624	16	17			GJ-1 - 31	0.09764	600.5	6	600.358	8.14981	600.425	8.14974	17.8236
GJ-1 - 32			26.831	991000	59600	10430000	323	29.52	0.25	0.806	0.014	0.0973	0.0011	0.51915	0.06014	0.00057	0.0294	0.0016	600.2	3.9	7.3	598.5	3.5	6.3	586	28	31	607	19	21			GJ-1 - 32	0.0973	598.5	6.3	598.292	8.96623	598.359	8.96614	17.8262
GJ-1 - 33			26.831	990000	59400	10300000	320	29.68	0.25	0.8136	0.012	0.09845	0.00099	0.47736	0.05977	0.00049	0.0303	0.0015	604.4	3.9	6.7	605.3	2.9	5.8	604	21	29	594	16	18			GJ-1 - 33	0.09845	605.3	5.8	605.053	8.06136	605.12	8.06129	17.8273
Plesovice - 1			26.411	1151000	62060	21700000	628	9.373	0.061	0.3963	0.0056	0.05375	0.00052	0.51427	0.05313	0.00048	0.01735	0.00061	339	2.7	4.1	337.5	2	3.2	347.6	7.5	12	332	19	20			Plesovice - 1	0.05375	337.5	3.2	337.021	4.409	337.09	4.40897	17.8622
Plesovice - 2			26.68	1324800	71640	24890000	680	9.14	0.25	0.4008	0.0062	0.054	0.00053	0.44691	0.05401	0.00051	0.01771	0.00066	342.2	2.8	4.5	339	2	3.2	354.8	8	13	369	20	21			Plesovice - 2	0.054	339	3.2	338.15	4.4905	338.22	4.49047	17.899
Plesovice - 5			23.301	1598000	85710	30200000	741	5.936	0.053	0.4045	0.006	0.05461	0.0006	0.60812	0.05344	0.00046	0.01734	0.00058	344.9	2.7	4.3	342.8	2.3	3.7	347.5	5.6	12	346	18	20			Plesovice - 5	0.05461	342.8	3.7	341.133	5.07901	341.202	5.07898	17.9473
Plesovice - 6			15.502	767100	41170	15310000	470	10.371	0.083	0.4014	0.0066	0.05462	0.00064	0.60843	0.05361	0.00056	0.01684	0.00064	342.6	4.1	4.5	342.8	3.1	3.9	337.5	9.4	13	353	22	24			Plesovice - 6	0.05462	342.8	3.9	343.538	5.45348	343.607	5.45344	17.7422
Plesovice - 7			26.16	1488000	79900	28100000	775	7.248	0.045	0.3985	0.0058	0.05417	0.00052	0.42612	0.05363	0.0005	0.017	0.00059	340.5	2.7	4.2	340.1	2.1	3.2	340.8	7	12	353	20	21			Plesovice - 7	0.05417	340.1	3.2	338.5	4.41109	338.57	4.41106	17.9605
Plesovice - 8			16.15	1472000	78500	25960000	1503	5.781	0.043	0.4017	0.0068	0.05483	0.00065	0.28733	0.05301	0.00079	0.01728	0.00059	342.9	4	4.9	344.1	2.8	3.9	346.3	7	12	326	33	34			Plesovice - 8	0.05483	344.1	3.9	336.218	5.84704	336.288	5.847	18.2556
Plesovice - 9			20.224	828000	44200	15170000	433	9.757	0.074	0.3978	0.0056	0.05395	0.0006	0.40271	0.05313	0.0005	0.01712	0.00082	340.1	2.5	4	338.7	2.4	3.7	343	13	16	336	20	22			Plesovice - 9	0.05395	338.7	3.7	339.746	5.12869	339.815	5.12866	17.7014
Plesovice - 10			26.663	1514000	81000	28700000	1127	5.992	0.033	0.4015	0.0056	0.05443	0.00057	0.58574	0.05321	0.00045	0.01693	0.00057	342.7	2.3	4	341.7	2.3	3.5	339.3	5.1	11	336	18	19			Plesovice - 10	0.05443	341.7	3.5	337.311	4.93275	337.381	4.93272	18.1282
91500 - 1			26.411	360400	27100	2033000	12.57	2.458	0.02	1.858	0.031	0.1778	0.002	0.62296	0.07483	0.00089	0.0528	0.0019	1066	8	11	1054.9	8.2	11	1039	24	37	1062	23	24			91500 - 1	0.1778	1054.9	11	1065.26	15.7374	1065.32	15.7373	16.7237
91500 - 2			18.633	356300	27120	1986000	49.3	2.503	0.02	1.816	0.031	0.1765	0.0023	0.30369	0.0749	0.0011	0.0554	0.0022	1051	8.2	11	1047.7	8.9	12	1090	31	43	1064	28	29			91500 - 2	0.1765	1047.7	12	1058.32	18.0883	1058.38	18.0882	17.3066
91500 - 3			26.411	367500	27790	2160000	138.7	2.524	0.024	1.827	0.032	0.177	0.0021	0.368	0.07523	0.00095	0.0534	0.0018	1054.7	8.8	11	1050.4	8.4	11	1051	21	34	1076	25	26			91500 - 3	0.177	1050.4	11	1052.33	16.0256	1052.39	16.0254	17.7539
91500 - 4			22.303	338700	25320	1933000	91.8	2.563	0.028	1.809	0.035	0.1777	0.0022	0.43294	0.07372	0.001	0.0538	0.002	1048.3	9.9	13	1054.5	9.3	12	1060	25	38	1031	27	28			91500 - 4	0.1777	1054.5	12	1060.59	16.9942	1060.65	16.994	17.5794
91500 - 5			9.5831	336500	25630	1800000	46.7	2.458	0.031	1.873	0.041	0.1781	0.0023	0.045577	0.0757	0.0018	0.0521	0.0023	1071	12	15	1056.8	9.2	13	1026	32	44	1085	46	46			91500 - 5	0.1781	1056.8	13	1067.23	18.0734	1067.29	18.0732	17.2886
91500 - 6			26.797	366800	27660	2140000	66.1	2.583	0.022	1.832	0.033	0.1774	0.0019	0.31765	0.07544	0.001	0.0535	0.0019	1056.4	9.5	12	1052.8	7.5	11	1052	25	37	1077	26	27			91500 - 6	0.1774	1052.8	11	1060.17	14.7869	1060.23	14.7868	17.435
91500 - 7			26.126	369200	27840	2150000	58.6	2.619	0.023	1.839	0.033	0.1777	0.0019	0.56396	0.07459	0.0009	0.0537	0.0019	1059	9.3	12	1054.2	7.2	10	1057	24	37	1055	23	24			91500 - 7	0.1777	1054.2	10	1062.36	14.8214	1062.42	14.8212	17.3844
91500 - 8			23.074	367900	28040	2136000	130.6	2.465	0.021	1.846	0.032	0.1768	0.0019	0.34443	0.07591	0.00094	0.0523	0.002	1061.6	9.9	11	1049.3	7.6	11	1029	26	39	1096	26	27			91500 - 8	0.1768	1049.3	11	1051.67	14.5171	1051.74	14.517	17.73
91500 - 9			26.562	316900	23780	1822000	53	2.677	0.024	1.852	0.031	0.1792	0.0019	0.24075	0.07517	0.001	0.0523	0.0019	1063.9	8.1	11	1064.4	6.6	10	1030	23	37	1070	26	27			91500 - 9	0.1792	1064.4	10	1070.94	14.8289	1071	14.8287	17.3426
91500 - 10			23.292	338300	25630	1915000	72.2	2.759	0.023	1.823	0.03	0.1768	0.0022	0.41346	0.07535	0.00087	0.0536	0.0019	1055.3	7.3	11	1049.3	9.4	12	1054	23	36	1076	22	23			91500 - 10	0.1768	1049.3	12	1057.55	17.1338	1057.61	17.1336	17.4712

## Sheet: references
Reference material analyses by sessions
1 - Weighted mean average; 2 - Propagated 2SE without Ssys; 3 - MSWD; 4 - No. Analyses; 5 - Average rel. 2SE of individual analyses
Sessions	GJ-11					Plesovice2					91500 3					AUSZ7-14					AUSZ7-55					AUSZ8-106
	Ref. age: 601.9 Ma					Ref. age: 337.15 Ma					Ref. age: 1063.5 Ma					Ref. age: 38.89 Ma					Ref. age: 2.35 Ma					Ref. age: 1.431 Ma (no Th diseq. correction)
	1	2	3	4	5	1	2	3	4	5	1	2	3	4	5	1	2	3	4	5	1	2	3	4	5	1	2	3	4	5
20160409p1
uncorrected	601.86	0.91	1	30	0.83	341.1	1.3	10.5	6	0.95	1052.3	5.8	2.2	9	1	37.54	0.27	1.7	9	2.16	2.265	0.063	1.5	9	8.44
shift corrected	601.25	0.92	0.93	30	0.84	340.3	1.3	7.1	6	0.96	1059.4	3.5	2.6	9	1.01	39	0.29	1.5	9	2.25	2.42	0.068	1.4	9	8.51
Th diseq. corrected																39.07	0.29	1.5	9	2.25	2.497	0.075	1.15	9	9.03
20160409p2
uncorrected	601.95	0.89	0.84	36	0.9	339.74	0.96	2.8	12	0.99	1053.8	3.1	1.9	12	1.03	38.04	0.25	0.98	12	2.37	2.345	0.065	0.75	12	9.77
shift corrected	601.36	0.9	0.82	36	0.91	339.2	0.96	1.7	12	1.01	1058.6	3.1	1.7	12	1.04	39	0.26	0.95	12	2.44	2.452	0.068	0.73	12	9.83
Th diseq. corrected																39.07	0.26	0.96	12	2.43	2.526	0.073	0.63	12	10.16
20191204
uncorrected	601.9	1.1	0.58	32	1.07	340.6	1.9	1.7	8	1.04	1053.7	3.5	0.83	10	1.07	37.93	0.26	1.3	10	1.77	2.416	0.047	0.9	10	6.49	1.497	0.053	1.4	9	7.17
shift corrected	601.6	1.5	0.3	32	1.49	338.8	1.7	0.84	8	1.47	1060.6	4.9	0.63	10	1.52	38.4	0.29	0.72	10	2.53	2.466	0.068	0.5	10	9.18	1.554	0.068	1.3	9	10.09
Th diseq. corrected																38.47	0.29	0.72	10	2.53	2.539	0.068	0.5	10	8.94	1.627	0.068	1.3	9	9.68
1 - Jackson et al., 2004; Horstwood et al., 2016
2 - Sláma et al., 2008; Horstwood et al., 2016
3 - Wiedenbeck et al., 1995; Horstwood et al., 2016
4 - Kennedy et al. 2014; ID-TIMS dating of University of Geneva: 38.896 ± 0.05 Ma
5 - von Quadt et al., 2016; ID-TIMS dating of ETH, Zürich: 2.4095 ± 0.0017 Ma
6 - this study: ID-TIMS dating of ETH Zürich: 1.431 ± 0.002 Ma
Reference:
Horstwood, M.S.A., Košler, J., Gehrels, G., Jackson, S.E., Mclean, N.M., Paton, C., Pearson, N.J., Sircombe, K., Sylvester, P., Vermeesch, P., Bowring, J.F., Condon, D.J., and Schoene, B. (2016). Community-Derived Standards for LA-ICP-MS U-(Th-)Pb Geochronology – Uncertainty Propagation, Age Interpretation and Data Reporting. Geostandards and Geoanalytical Research 40, 311-332. https://doi.org/10…
Jackson, S. E., Pearson, N. J., Griffin, W. L., and Belousova, E. A. (2004). The application of laser ablation-inductively coupled plasma-mass spectrometry to in situ U–Pb zircon geochronology. Chem. Geol. 211 (1), 47–69. doi:10.1016/j.chemgeo.2004.06.017
Kennedy, A.K., Wotzlaw, J.-F., Schaltegger, U., Crowley, J.L., and Schmitz, M. (2014). Eocene zircon reference material for microanalysis of U-Th-Pb isotopes and trace elements. The Canadian Mineralogist 52(3), 409-421. doi:10.3749/canmin.52.3.409.
Sláma, J., Košler, J., Condon, D.J., Crowley, J.L., Gerdes, A., Hanchar, J.M., et al. (2008). Plešovice zircon — A new natural reference material for U–Pb and Hf isotopic microanalysis. Chemical Geology 249(1), 1-35. doi:10.1016/j.chemgeo.2007.11.005.
von Quadt, A., Wotzlaw, J.-F., Buret, Y., Large, S.J.E., Peytcheva, I., and Trinquier, A. (2016). High-precision zircon U/Pb geochronology by ID-TIMS using new 1013 ohm resistors. Journal of Analytical Atomic Spectrometry 31(3), 658-665. doi: 10.1039/C5JA00457H.
Wiedenbeck, M., Allé, P., Corfu, F., Griffin, W.L., Meier, M., Oberli, F., et al. (1995). Three natural zircon standards for U-Th-Pb, Lu-Hf, trace element and REE analyses. Geostandards Newsletter 19(1), 1-23. doi:10.1111/j.1751-908X.1995.tb00147.x.

## Sheet: ID-TIMS data of AUSZ8-10
ID-TIMS data of reference material AUSZ8-10	Dates (Ma)						Composition				Isotopic Ratios
	206Pb/	±2σ	207Pb/	±2σ	207Pb/	±2σ	Th/	Pb*	Pbc	Pb*/	206Pb/	206Pb/		207Pb/		207Pb/		Corr.
Fraction	238U a	abs	235U a	abs	206Pb a	abs	U b	(pg) c	(pg) d	Pbc e	204Pb f	238U g	±2σ %	235U g	±2σ %	206Pb g	±2σ %	coef.
A810_z2	1.42902	0.00337283	1.6168	0.0539454	291.189	72.5206	0.719719	0.854702	0.11004	7.76718	448.735	0.000221702	0.23605	0.00159357	3.33921	0.0521549	3.17466	0.714614
A810_z3	1.43259	0.00384083	1.59981	0.0580614	261.265	79.2234	0.680652	1.18015	0.133207	8.85952	514.562	0.000222256	0.268133	0.00157682	3.63212	0.051478	3.4495	0.700331
A810_z4	1.43214	0.00572787	1.74264	0.114621	455.159	140.439	0.715286	0.371264	0.175766	2.11226	135.214	0.000222185	0.399997	0.00171771	6.58306	0.0560955	6.32831	0.654739
A810_z5	1.42551	0.0223642	1.87069	0.469854	620.58	522.64	0.687962	0.20105	0.42094	0.477622	44.9159	0.000221157	1.56903	0.00184405	25.1397	0.0605011	24.2227	0.604993
A810_z6	1.42556	0.012752	1.68042	0.247982	384.196	317.377	0.660086	0.168373	0.152297	1.10556	80.515	0.000221164	0.894629	0.00165633	14.7693	0.0543408	14.1255	0.734236
A810_z7	1.43226	0.0122634	1.98971	0.256196	742.371	262.104	0.740477	0.504296	0.564657	0.8931	67.1777	0.000222204	0.856324	0.00196148	12.8887	0.064051	12.3935	0.600277
weighted mean	1.4307	0.0022	MSWD=0.63
a Isotopic dates calculated using λ238 = 1.55125E-10 (Jaffey et al. 1971) and λ235 = 9.8485E-10 (Jaffey et al. 1971). No Th disequilibrium correction applied.
b Th contents calculated from radiogenic 208Pb and 230Th-corrected 206Pb/238U date of the sample, assuming concordance between U-Pb Th-Pb systems.
c Total mass of radiogenic Pb.
d Total mass of common Pb.
e Ratio of radiogenic Pb (including 208Pb) to common Pb.
f Measured ratio corrected for fractionation and spike contribution only.
g Measured ratios corrected for fractionation, tracer and blank.
Analytical conditions are similar to von Quadt et al. (2016)
Reference:
von Quadt, A., Wotzlaw, J.-F., Buret, Y., Large, S.J.E., Peytcheva, I., and Trinquier, A. (2016). High-precision zircon U/Pb geochronology by ID-TIMS using new 1013 ohm resistors. Journal of Analytical Atomic Spectrometry 31(3), 658-665. doi: 10.1039/C5JA00457H.

## Sheet: PlotDat1
Source sheet	samples_sorted	0.2	17.4924	3	18.4747	0.661717	1	20.1	0.431132	2.85	17.813
Plot name	Average0	45.8	17.4924	4	18.0551	0.410056	2	18.7845	0.337171	3.15	17.813
Plot Type	15			5	18.0401	0.414887	45	16.6053	0.223259	3.15	19.1364
1st free col	11			6	17.9839	0.30022	IsoLine	IsoLine	IsoLine	2.85	19.1364
Sigma Level	2			7	17.9594	0.1939				2.85	17.813
Absolute Errs	TRUE			8	17.9314	0.368759				ErrBox	ErrBox
Symbol Type	1			9	17.9024	0.258639				3.85	17.6451
Inverse Plot	FALSE			10	17.8392	0.276841				4.15	17.6451
Color Plot	TRUE			11	17.8317	0.297333				4.15	18.4652
3D plot	FALSE			12	17.811	0.381025				3.85	18.4652
Linear	FALSE			13	17.7751	0.38847				3.85	17.6451
Data Range	AC3:AD47			14	17.7679	0.290219				ErrBox	ErrBox
Filled Symbols	TRUE			15	17.7181	0.447756				4.85	17.6252
ConcAge	FALSE			16	17.6814	0.250917				5.15	17.6252
ConcSwap	FALSE			17	17.6282	0.375947				5.15	18.455
1st Symbol-row	1			18	17.6146	0.252251				4.85	18.455
				19	17.6005	0.21798				4.85	17.6252
				20	17.5859	0.266549				ErrBox	ErrBox
				21	17.5565	0.203066				5.85	17.6837
				22	17.5322	0.396887				6.15	17.6837
				23	17.5108	0.304602				6.15	18.2842
				24	17.5071	0.215185				5.85	18.2842
				25	17.4723	0.283503				5.85	17.6837
				26	17.4534	0.403611				ErrBox	ErrBox
				27	17.4533	0.344032				6.85	17.7655
				28	17.4498	0.290999				7.15	17.7655
				29	17.4145	0.256898				7.15	18.1533
				30	17.3824	0.500276				6.85	18.1533
				31	17.3706	0.209668				6.85	17.7655
				32	17.2792	0.317491				ErrBox	ErrBox
				33	17.2782	0.343611				7.85	17.5627
				34	17.2689	0.248519				8.15	17.5627
				35	17.236	0.262024				8.15	18.3002
				36	17.2344	0.308322				7.85	18.3002
				37	17.2134	0.213862				7.85	17.5627
				38	17.2019	0.258116				ErrBox	ErrBox
				39	17.1768	0.279044				8.85	17.6438
				40	17.1762	0.367599				9.15	17.6438
				41	17.0581	0.212403				9.15	18.161
				42	17.0258	0.424685				8.85	18.161
				43	16.9857	0.250881				8.85	17.6438
				44	16.8592	0.284815				ErrBox	ErrBox
				IsoLine	IsoLine	IsoLine	IsoLine			9.85	17.5623
										10.15	17.5623
										10.15	18.116
										9.85	18.116
										9.85	17.5623
										ErrBox	ErrBox
										10.85	17.5343
										11.15	17.5343
										11.15	18.129
										10.85	18.129
										10.85	17.5343
										ErrBox	ErrBox
										11.85	17.4299
										12.15	17.4299
										12.15	18.192
										11.85	18.192
										11.85	17.4299
										ErrBox	ErrBox
										12.85	17.3866
										13.15	17.3866
										13.15	18.1635
										12.85	18.1635
										12.85	17.3866
										ErrBox	ErrBox
										13.85	17.4777
										14.15	17.4777
										14.15	18.0582
										13.85	18.0582
										13.85	17.4777
										ErrBox	ErrBox
										14.85	17.2703
										15.15	17.2703
										15.15	18.1658
										14.85	18.1658
										14.85	17.2703
										ErrBox	ErrBox
										15.85	17.4305
										16.15	17.4305
										16.15	17.9324
										15.85	17.9324
										15.85	17.4305
										ErrBox	ErrBox
										16.85	17.2523
										17.15	17.2523
										17.15	18.0042
										16.85	18.0042
										16.85	17.2523
										ErrBox	ErrBox
										17.85	17.3624
										18.15	17.3624
										18.15	17.8669
										17.85	17.8669
										17.85	17.3624
										ErrBox	ErrBox
										18.85	17.3825
										19.15	17.3825
										19.15	17.8185
										18.85	17.8185
										18.85	17.3825
										ErrBox	ErrBox
										19.85	17.3194
										20.15	17.3194
										20.15	17.8525
										19.85	17.8525
										19.85	17.3194
										ErrBox	ErrBox
										20.85	17.3535
										21.15	17.3535
										21.15	17.7596
										20.85	17.7596
										20.85	17.3535
										ErrBox	ErrBox
										21.85	17.1354
										22.15	17.1354
										22.15	17.9291
										21.85	17.9291
										21.85	17.1354
										ErrBox	ErrBox
										22.85	17.2062
										23.15	17.2062
										23.15	17.8154
										22.85	17.8154
										22.85	17.2062
										ErrBox	ErrBox
										23.85	17.2919
										24.15	17.2919
										24.15	17.7223
										23.85	17.7223
										23.85	17.2919
										ErrBox	ErrBox
										24.85	17.1888
										25.15	17.1888
										25.15	17.7558
										24.85	17.7558
										24.85	17.1888
										ErrBox	ErrBox
										25.85	17.0498
										26.15	17.0498
										26.15	17.857
										25.85	17.857
										25.85	17.0498
										ErrBox	ErrBox
										26.85	17.1092
										27.15	17.1092
										27.15	17.7973
										26.85	17.7973
										26.85	17.1092
										ErrBox	ErrBox
										27.85	17.1588
										28.15	17.1588
										28.15	17.7408
										27.85	17.7408
										27.85	17.1588
										ErrBox	ErrBox
										28.85	17.1576
										29.15	17.1576
										29.15	17.6714
										28.85	17.6714
										28.85	17.1576
										ErrBox	ErrBox
										29.85	16.8822
										30.15	16.8822
										30.15	17.8827
										29.85	17.8827
										29.85	16.8822
										ErrBox	ErrBox
										30.85	17.1609
										31.15	17.1609
										31.15	17.5803
										30.85	17.5803
										30.85	17.1609
										ErrBox	ErrBox
										31.85	16.9617
										32.15	16.9617
										32.15	17.5967
										31.85	17.5967
										31.85	16.9617
										ErrBox	ErrBox
										32.85	16.9346
										33.15	16.9346
										33.15	17.6218
										32.85	17.6218
										32.85	16.9346
										ErrBox	ErrBox
										33.85	17.0204
										34.15	17.0204
										34.15	17.5174
										33.85	17.5174
										33.85	17.0204
										ErrBox	ErrBox
										34.85	16.974
										35.15	16.974
										35.15	17.498
										34.85	17.498
										34.85	16.974
										ErrBox	ErrBox
										35.85	16.9261
										36.15	16.9261
										36.15	17.5427
										35.85	17.5427
										35.85	16.9261
										ErrBox	ErrBox
										36.85	16.9995
										37.15	16.9995
										37.15	17.4272
										36.85	17.4272
										36.85	16.9995
										ErrBox	ErrBox
										37.85	16.9437
										38.15	16.9437
										38.15	17.46
										37.85	17.46
										37.85	16.9437
										ErrBox	ErrBox
										38.85	16.8978
										39.15	16.8978
										39.15	17.4559
										38.85	17.4559
										38.85	16.8978
										ErrBox	ErrBox
										39.85	16.8086
										40.15	16.8086
										40.15	17.5438
										39.85	17.5438
										39.85	16.8086
										ErrBox	ErrBox
										40.85	16.8457
										41.15	16.8457
										41.15	17.2705
										40.85	17.2705
										40.85	16.8457
										ErrBox	ErrBox
										41.85	16.6011
										42.15	16.6011
										42.15	17.4504
										41.85	17.4504
										41.85	16.6011
										ErrBox	ErrBox
										42.85	16.7348
										43.15	16.7348
										43.15	17.2366
										42.85	17.2366
										42.85	16.7348
										ErrBox	ErrBox
										43.85	16.5744
										44.15	16.5744
										44.15	17.144
										43.85	17.144
										43.85	16.5744
										ErrBox	ErrBox
										0.85	19.6689
										1.15	19.6689
										1.15	20.5311
										0.85	20.5311
										0.85	19.6689
										ErrBox	ErrBox
										1.85	18.4473
										2.15	18.4473
										2.15	19.1217
										1.85	19.1217
										1.85	18.4473
										ErrBox	ErrBox
										44.85	16.3821
										45.15	16.3821
										45.15	16.8286
										44.85	16.8286
										44.85	16.3821
										ErrBox	ErrBox

## Sheet: PlotDat5
Source sheet	samples_sorted	0.2	17.2585	1	17.5071	0.215185	22	16.6053	0.223259	0.85	17.2919
Plot name	Average3	22.8	17.2585	2	17.4723	0.283503	IsoLine	IsoLine	IsoLine	1.15	17.2919
Plot Type	15			3	17.4534	0.403611				1.15	17.7223
1st free col	11			4	17.4533	0.344032				0.85	17.7223
Sigma Level	2			5	17.4498	0.290999				0.85	17.2919
Absolute Errs	TRUE			6	17.4145	0.256898				ErrBox	ErrBox
Symbol Type	1			7	17.3824	0.500276				1.85	17.1888
Inverse Plot	FALSE			8	17.3706	0.209668				2.15	17.1888
Color Plot	TRUE			9	17.2792	0.317491				2.15	17.7558
3D plot	FALSE			10	17.2782	0.343611				1.85	17.7558
Linear	FALSE			11	17.2689	0.248519				1.85	17.1888
Data Range	AC26:AD47			12	17.236	0.262024				ErrBox	ErrBox
Filled Symbols	TRUE			13	17.2344	0.308322				2.85	17.0498
ConcAge	FALSE			14	17.2134	0.213862				3.15	17.0498
ConcSwap	FALSE			15	17.2019	0.258116				3.15	17.857
1st Symbol-row	1			16	17.1768	0.279044				2.85	17.857
				17	17.1762	0.367599				2.85	17.0498
				18	17.0581	0.212403				ErrBox	ErrBox
				19	17.0258	0.424685				3.85	17.1092
				20	16.9857	0.250881				4.15	17.1092
				21	16.8592	0.284815				4.15	17.7973
				IsoLine	IsoLine	IsoLine	IsoLine			3.85	17.7973
										3.85	17.1092
										ErrBox	ErrBox
										4.85	17.1588
										5.15	17.1588
										5.15	17.7408
										4.85	17.7408
										4.85	17.1588
										ErrBox	ErrBox
										5.85	17.1576
										6.15	17.1576
										6.15	17.6714
										5.85	17.6714
										5.85	17.1576
										ErrBox	ErrBox
										6.85	16.8822
										7.15	16.8822
										7.15	17.8827
										6.85	17.8827
										6.85	16.8822
										ErrBox	ErrBox
										7.85	17.1609
										8.15	17.1609
										8.15	17.5803
										7.85	17.5803
										7.85	17.1609
										ErrBox	ErrBox
										8.85	16.9617
										9.15	16.9617
										9.15	17.5967
										8.85	17.5967
										8.85	16.9617
										ErrBox	ErrBox
										9.85	16.9346
										10.15	16.9346
										10.15	17.6218
										9.85	17.6218
										9.85	16.9346
										ErrBox	ErrBox
										10.85	17.0204
										11.15	17.0204
										11.15	17.5174
										10.85	17.5174
										10.85	17.0204
										ErrBox	ErrBox
										11.85	16.974
										12.15	16.974
										12.15	17.498
										11.85	17.498
										11.85	16.974
										ErrBox	ErrBox
										12.85	16.9261
										13.15	16.9261
										13.15	17.5427
										12.85	17.5427
										12.85	16.9261
										ErrBox	ErrBox
										13.85	16.9995
										14.15	16.9995
										14.15	17.4272
										13.85	17.4272
										13.85	16.9995
										ErrBox	ErrBox
										14.85	16.9437
										15.15	16.9437
										15.15	17.46
										14.85	17.46
										14.85	16.9437
										ErrBox	ErrBox
										15.85	16.8978
										16.15	16.8978
										16.15	17.4559
										15.85	17.4559
										15.85	16.8978
										ErrBox	ErrBox
										16.85	16.8086
										17.15	16.8086
										17.15	17.5438
										16.85	17.5438
										16.85	16.8086
										ErrBox	ErrBox
										17.85	16.8457
										18.15	16.8457
										18.15	17.2705
										17.85	17.2705
										17.85	16.8457
										ErrBox	ErrBox
										18.85	16.6011
										19.15	16.6011
										19.15	17.4504
										18.85	17.4504
										18.85	16.6011
										ErrBox	ErrBox
										19.85	16.7348
										20.15	16.7348
										20.15	17.2366
										19.85	17.2366
										19.85	16.7348
										ErrBox	ErrBox
										20.85	16.5744
										21.15	16.5744
										21.15	17.144
										20.85	17.144
										20.85	16.5744
										ErrBox	ErrBox
										21.85	16.3821
										22.15	16.3821
										22.15	16.8286
										21.85	16.8286
										21.85	16.3821
										ErrBox	ErrBox

## Sheet: PlotDat7
Source sheet	samples_sorted	0.2	17.678	2	18.4348	0.296918	1	20.4142	0.405471	1.85	18.1378
Plot name	Average0	45.8	17.678	3	18.3676	0.483803	IsoLine	IsoLine	IsoLine	2.15	18.1378
Plot Type	15			4	18.2078	0.373134				2.15	18.7317
1st free col	11			5	18.1625	0.226689				1.85	18.7317
Sigma Level	2			6	18.1405	0.513469				1.85	18.1378
Absolute Errs	TRUE			7	18.1405	0.277808				ErrBox	ErrBox
Symbol Type	1			8	18.1292	0.435673				2.85	17.8838
Inverse Plot	FALSE			9	18.1148	0.301099				3.15	17.8838
Color Plot	TRUE			10	18.1124	0.263885				3.15	18.8514
3D plot	FALSE			11	18.1069	0.390305				2.85	18.8514
Linear	FALSE			12	18.0517	0.286311				2.85	17.8838
Data Range	AC59:AD103			13	18.0318	0.37725				ErrBox	ErrBox
Filled Symbols	TRUE			14	18.0288	0.20766				3.85	17.8346
ConcAge	FALSE			15	17.9509	0.296739				4.15	17.8346
ConcSwap	FALSE			16	17.9505	0.235342				4.15	18.5809
1st Symbol-row	1			17	17.9435	0.256064				3.85	18.5809
				18	17.9236	0.246594				3.85	17.8346
				19	17.9077	0.298729				ErrBox	ErrBox
				20	17.8013	0.318804				4.85	17.9358
				21	17.7648	0.312617				5.15	17.9358
				22	17.7453	0.294041				5.15	18.3892
				23	17.6894	0.249739				4.85	18.3892
				24	17.6247	0.227384				4.85	17.9358
				25	17.581	0.227071				ErrBox	ErrBox
				26	17.5692	0.26559				5.85	17.627
				27	17.5469	0.255187				6.15	17.627
				28	17.5441	0.426566				6.15	18.654
				29	17.5341	0.372792				5.85	18.654
				30	17.4973	0.280878				5.85	17.627
				31	17.4958	0.418823				ErrBox	ErrBox
				32	17.4602	0.260655				6.85	17.8627
				33	17.4511	0.296684				7.15	17.8627
				34	17.4131	0.204094				7.15	18.4183
				35	17.3661	0.255573				6.85	18.4183
				36	17.355	0.231753				6.85	17.8627
				37	17.3096	0.401115				ErrBox	ErrBox
				38	17.2868	0.357569				7.85	17.6935
				39	17.2783	0.233143				8.15	17.6935
				40	17.2491	0.241193				8.15	18.5649
				41	17.2359	0.270705				7.85	18.5649
				42	17.2298	0.255554				7.85	17.6935
				43	17.2071	0.302065				ErrBox	ErrBox
				44	17.1658	0.263691				8.85	17.8137
				45	16.9172	0.365581				9.15	17.8137
				IsoLine	IsoLine	IsoLine	IsoLine			9.15	18.4159
										8.85	18.4159
										8.85	17.8137
										ErrBox	ErrBox
										9.85	17.8485
										10.15	17.8485
										10.15	18.3763
										9.85	18.3763
										9.85	17.8485
										ErrBox	ErrBox
										10.85	17.7166
										11.15	17.7166
										11.15	18.4973
										10.85	18.4973
										10.85	17.7166
										ErrBox	ErrBox
										11.85	17.7654
										12.15	17.7654
										12.15	18.3381
										11.85	18.3381
										11.85	17.7654
										ErrBox	ErrBox
										12.85	17.6545
										13.15	17.6545
										13.15	18.409
										12.85	18.409
										12.85	17.6545
										ErrBox	ErrBox
										13.85	17.8212
										14.15	17.8212
										14.15	18.2365
										13.85	18.2365
										13.85	17.8212
										ErrBox	ErrBox
										14.85	17.6541
										15.15	17.6541
										15.15	18.2476
										14.85	18.2476
										14.85	17.6541
										ErrBox	ErrBox
										15.85	17.7152
										16.15	17.7152
										16.15	18.1859
										15.85	18.1859
										15.85	17.7152
										ErrBox	ErrBox
										16.85	17.6874
										17.15	17.6874
										17.15	18.1996
										16.85	18.1996
										16.85	17.6874
										ErrBox	ErrBox
										17.85	17.677
										18.15	17.677
										18.15	18.1702
										17.85	18.1702
										17.85	17.677
										ErrBox	ErrBox
										18.85	17.6089
										19.15	17.6089
										19.15	18.2064
										18.85	18.2064
										18.85	17.6089
										ErrBox	ErrBox
										19.85	17.4825
										20.15	17.4825
										20.15	18.1201
										19.85	18.1201
										19.85	17.4825
										ErrBox	ErrBox
										20.85	17.4522
										21.15	17.4522
										21.15	18.0774
										20.85	18.0774
										20.85	17.4522
										ErrBox	ErrBox
										21.85	17.4513
										22.15	17.4513
										22.15	18.0393
										21.85	18.0393
										21.85	17.4513
										ErrBox	ErrBox
										22.85	17.4397
										23.15	17.4397
										23.15	17.9392
										22.85	17.9392
										22.85	17.4397
										ErrBox	ErrBox
										23.85	17.3973
										24.15	17.3973
										24.15	17.8521
										23.85	17.8521
										23.85	17.3973
										ErrBox	ErrBox
										24.85	17.354
										25.15	17.354
										25.15	17.8081
										24.85	17.8081
										24.85	17.354
										ErrBox	ErrBox
										25.85	17.3036
										26.15	17.3036
										26.15	17.8348
										25.85	17.8348
										25.85	17.3036
										ErrBox	ErrBox
										26.85	17.2917
										27.15	17.2917
										27.15	17.8021
										26.85	17.8021
										26.85	17.2917
										ErrBox	ErrBox
										27.85	17.1175
										28.15	17.1175
										28.15	17.9707
										27.85	17.9707
										27.85	17.1175
										ErrBox	ErrBox
										28.85	17.1613
										29.15	17.1613
										29.15	17.9069
										28.85	17.9069
										28.85	17.1613
										ErrBox	ErrBox
										29.85	17.2165
										30.15	17.2165
										30.15	17.7782
										29.85	17.7782
										29.85	17.2165
										ErrBox	ErrBox
										30.85	17.077
										31.15	17.077
										31.15	17.9146
										30.85	17.9146
										30.85	17.077
										ErrBox	ErrBox
										31.85	17.1996
										32.15	17.1996
										32.15	17.7209
										31.85	17.7209
										31.85	17.1996
										ErrBox	ErrBox
										32.85	17.1544
										33.15	17.1544
										33.15	17.7478
										32.85	17.7478
										32.85	17.1544
										ErrBox	ErrBox
										33.85	17.209
										34.15	17.209
										34.15	17.6171
										33.85	17.6171
										33.85	17.209
										ErrBox	ErrBox
										34.85	17.1105
										35.15	17.1105
										35.15	17.6216
										34.85	17.6216
										34.85	17.1105
										ErrBox	ErrBox
										35.85	17.1233
										36.15	17.1233
										36.15	17.5868
										35.85	17.5868
										35.85	17.1233
										ErrBox	ErrBox
										36.85	16.9085
										37.15	16.9085
										37.15	17.7107
										36.85	17.7107
										36.85	16.9085
										ErrBox	ErrBox
										37.85	16.9292
										38.15	16.9292
										38.15	17.6444
										37.85	17.6444
										37.85	16.9292
										ErrBox	ErrBox
										38.85	17.0452
										39.15	17.0452
										39.15	17.5114
										38.85	17.5114
										38.85	17.0452
										ErrBox	ErrBox
										39.85	17.0079
										40.15	17.0079
										40.15	17.4903
										39.85	17.4903
										39.85	17.0079
										ErrBox	ErrBox
										40.85	16.9652
										41.15	16.9652
										41.15	17.5066
										40.85	17.5066
										40.85	16.9652
										ErrBox	ErrBox
										41.85	16.9742
										42.15	16.9742
										42.15	17.4854
										41.85	17.4854
										41.85	16.9742
										ErrBox	ErrBox
										42.85	16.9051
										43.15	16.9051
										43.15	17.5092
										42.85	17.5092
										42.85	16.9051
										ErrBox	ErrBox
										43.85	16.9021
										44.15	16.9021
										44.15	17.4295
										43.85	17.4295
										43.85	16.9021
										ErrBox	ErrBox
										44.85	16.5516
										45.15	16.5516
										45.15	17.2828
										44.85	17.2828
										44.85	16.5516
										ErrBox	ErrBox
										0.85	20.0088
										1.15	20.0088
										1.15	20.8197
										0.85	20.8197
										0.85	20.0088
										ErrBox	ErrBox

## Sheet: PlotDat8
Source sheet	samples_sorted	0.2	17.4376	1	17.7648	0.312617	25	16.9172	0.365581	0.85	17.4522
Plot name	Average0	25.8	17.4376	2	17.7453	0.294041	IsoLine	IsoLine	IsoLine	1.15	17.4522
Plot Type	15			3	17.6894	0.249739				1.15	18.0774
1st free col	11			4	17.6247	0.227384				0.85	18.0774
Sigma Level	2			5	17.581	0.227071				0.85	17.4522
Absolute Errs	TRUE			6	17.5692	0.26559				ErrBox	ErrBox
Symbol Type	1			7	17.5469	0.255187				1.85	17.4513
Inverse Plot	FALSE			8	17.5441	0.426566				2.15	17.4513
Color Plot	TRUE			9	17.5341	0.372792				2.15	18.0393
3D plot	FALSE			10	17.4973	0.280878				1.85	18.0393
Linear	FALSE			11	17.4958	0.418823				1.85	17.4513
Data Range	AC79:AD103			12	17.4602	0.260655				ErrBox	ErrBox
Filled Symbols	TRUE			13	17.4511	0.296684				2.85	17.4397
ConcAge	FALSE			14	17.4131	0.204094				3.15	17.4397
ConcSwap	FALSE			15	17.3661	0.255573				3.15	17.9392
1st Symbol-row	1			16	17.355	0.231753				2.85	17.9392
				17	17.3096	0.401115				2.85	17.4397
				18	17.2868	0.357569				ErrBox	ErrBox
				19	17.2783	0.233143				3.85	17.3973
				20	17.2491	0.241193				4.15	17.3973
				21	17.2359	0.270705				4.15	17.8521
				22	17.2298	0.255554				3.85	17.8521
				23	17.2071	0.302065				3.85	17.3973
				24	17.1658	0.263691				ErrBox	ErrBox
				IsoLine	IsoLine	IsoLine	IsoLine			4.85	17.354
										5.15	17.354
										5.15	17.8081
										4.85	17.8081
										4.85	17.354
										ErrBox	ErrBox
										5.85	17.3036
										6.15	17.3036
										6.15	17.8348
										5.85	17.8348
										5.85	17.3036
										ErrBox	ErrBox
										6.85	17.2917
										7.15	17.2917
										7.15	17.8021
										6.85	17.8021
										6.85	17.2917
										ErrBox	ErrBox
										7.85	17.1175
										8.15	17.1175
										8.15	17.9707
										7.85	17.9707
										7.85	17.1175
										ErrBox	ErrBox
										8.85	17.1613
										9.15	17.1613
										9.15	17.9069
										8.85	17.9069
										8.85	17.1613
										ErrBox	ErrBox
										9.85	17.2165
										10.15	17.2165
										10.15	17.7782
										9.85	17.7782
										9.85	17.2165
										ErrBox	ErrBox
										10.85	17.077
										11.15	17.077
										11.15	17.9146
										10.85	17.9146
										10.85	17.077
										ErrBox	ErrBox
										11.85	17.1996
										12.15	17.1996
										12.15	17.7209
										11.85	17.7209
										11.85	17.1996
										ErrBox	ErrBox
										12.85	17.1544
										13.15	17.1544
										13.15	17.7478
										12.85	17.7478
										12.85	17.1544
										ErrBox	ErrBox
										13.85	17.209
										14.15	17.209
										14.15	17.6171
										13.85	17.6171
										13.85	17.209
										ErrBox	ErrBox
										14.85	17.1105
										15.15	17.1105
										15.15	17.6216
										14.85	17.6216
										14.85	17.1105
										ErrBox	ErrBox
										15.85	17.1233
										16.15	17.1233
										16.15	17.5868
										15.85	17.5868
										15.85	17.1233
										ErrBox	ErrBox
										16.85	16.9085
										17.15	16.9085
										17.15	17.7107
										16.85	17.7107
										16.85	16.9085
										ErrBox	ErrBox
										17.85	16.9292
										18.15	16.9292
										18.15	17.6444
										17.85	17.6444
										17.85	16.9292
										ErrBox	ErrBox
										18.85	17.0452
										19.15	17.0452
										19.15	17.5114
										18.85	17.5114
										18.85	17.0452
										ErrBox	ErrBox
										19.85	17.0079
										20.15	17.0079
										20.15	17.4903
										19.85	17.4903
										19.85	17.0079
										ErrBox	ErrBox
										20.85	16.9652
										21.15	16.9652
										21.15	17.5066
										20.85	17.5066
										20.85	16.9652
										ErrBox	ErrBox
										21.85	16.9742
										22.15	16.9742
										22.15	17.4854
										21.85	17.4854
										21.85	16.9742
										ErrBox	ErrBox
										22.85	16.9051
										23.15	16.9051
										23.15	17.5092
										22.85	17.5092
										22.85	16.9051
										ErrBox	ErrBox
										23.85	16.9021
										24.15	16.9021
										24.15	17.4295
										23.85	17.4295
										23.85	16.9021
										ErrBox	ErrBox
										24.85	16.5516
										25.15	16.5516
										25.15	17.2828
										24.85	17.2828
										24.85	16.5516
										ErrBox	ErrBox

## Sheet: PlotDat9
Source sheet	samples_sorted	0.2	17.9683	2	19.1175	0.336877	1	37.4249	0.533633	1.85	18.7806
Plot name	Average0	47.8	17.9683	3	19.0253	0.390067	47	16.5559	0.226677	2.15	18.7806
Plot Type	15			4	18.8532	0.322455	IsoLine	IsoLine	IsoLine	2.15	19.4544
1st free col	11			5	18.8038	0.268204				1.85	19.4544
Sigma Level	2			6	18.7817	0.201331				1.85	18.7806
Absolute Errs	TRUE			7	18.6131	0.466206				ErrBox	ErrBox
Symbol Type	1			8	18.5099	0.318188				2.85	18.6353
Inverse Plot	FALSE			9	18.442	0.294921				3.15	18.6353
Color Plot	TRUE			10	18.3783	0.340986				3.15	19.4154
3D plot	FALSE			11	18.3386	0.289869				2.85	19.4154
Linear	FALSE			12	18.3186	0.300887				2.85	18.6353
Data Range	AC111:AD157			13	18.2927	0.364408				ErrBox	ErrBox
Filled Symbols	TRUE			14	18.2771	0.379235				3.85	18.5307
ConcAge	FALSE			15	18.2647	0.412363				4.15	18.5307
ConcSwap	FALSE			16	18.2288	0.353712				4.15	19.1756
1st Symbol-row	1			17	18.2137	0.215765				3.85	19.1756
				18	18.182	0.381217				3.85	18.5307
				19	18.1765	0.404435				ErrBox	ErrBox
				20	18.1218	0.386713				4.85	18.5356
				21	18.0445	0.234796				5.15	18.5356
				22	18.0138	0.238005				5.15	19.072
				23	18.0017	0.435451				4.85	19.072
				24	17.9926	0.302401				4.85	18.5356
				25	17.9253	0.287591				ErrBox	ErrBox
				26	17.788	0.373702				5.85	18.5804
				27	17.7637	0.332101				6.15	18.5804
				28	17.7552	0.265141				6.15	18.983
				29	17.7273	0.343666				5.85	18.983
				30	17.7053	0.34148				5.85	18.5804
				31	17.6955	0.319065				ErrBox	ErrBox
				32	17.6705	0.29664				6.85	18.1469
				33	17.6579	0.256373				7.15	18.1469
				34	17.6403	0.307066				7.15	19.0793
				35	17.6267	0.30457				6.85	19.0793
				36	17.5885	0.493256				6.85	18.1469
				37	17.5704	0.24343				ErrBox	ErrBox
				38	17.5529	0.248785				7.85	18.1918
				39	17.5162	0.340649				8.15	18.1918
				40	17.4084	0.26421				8.15	18.8281
				41	17.3973	0.362692				7.85	18.8281
				42	17.3725	0.24187				7.85	18.1918
				43	17.3459	0.467902				ErrBox	ErrBox
				44	17.2235	0.322565				8.85	18.1471
				45	17.2171	0.333228				9.15	18.1471
				46	17.132	0.230309				9.15	18.7369
				IsoLine	IsoLine	IsoLine	IsoLine			8.85	18.7369
										8.85	18.1471
										ErrBox	ErrBox
										9.85	18.0373
										10.15	18.0373
										10.15	18.7193
										9.85	18.7193
										9.85	18.0373
										ErrBox	ErrBox
										10.85	18.0487
										11.15	18.0487
										11.15	18.6285
										10.85	18.6285
										10.85	18.0487
										ErrBox	ErrBox
										11.85	18.0177
										12.15	18.0177
										12.15	18.6195
										11.85	18.6195
										11.85	18.0177
										ErrBox	ErrBox
										12.85	17.9282
										13.15	17.9282
										13.15	18.6571
										12.85	18.6571
										12.85	17.9282
										ErrBox	ErrBox
										13.85	17.8978
										14.15	17.8978
										14.15	18.6563
										13.85	18.6563
										13.85	17.8978
										ErrBox	ErrBox
										14.85	17.8523
										15.15	17.8523
										15.15	18.677
										14.85	18.677
										14.85	17.8523
										ErrBox	ErrBox
										15.85	17.8751
										16.15	17.8751
										16.15	18.5825
										15.85	18.5825
										15.85	17.8751
										ErrBox	ErrBox
										16.85	17.9979
										17.15	17.9979
										17.15	18.4294
										16.85	18.4294
										16.85	17.9979
										ErrBox	ErrBox
										17.85	17.8008
										18.15	17.8008
										18.15	18.5632
										17.85	18.5632
										17.85	17.8008
										ErrBox	ErrBox
										18.85	17.7721
										19.15	17.7721
										19.15	18.581
										18.85	18.581
										18.85	17.7721
										ErrBox	ErrBox
										19.85	17.7351
										20.15	17.7351
										20.15	18.5085
										19.85	18.5085
										19.85	17.7351
										ErrBox	ErrBox
										20.85	17.8097
										21.15	17.8097
										21.15	18.2793
										20.85	18.2793
										20.85	17.8097
										ErrBox	ErrBox
										21.85	17.7758
										22.15	17.7758
										22.15	18.2518
										21.85	18.2518
										21.85	17.7758
										ErrBox	ErrBox
										22.85	17.5663
										23.15	17.5663
										23.15	18.4372
										22.85	18.4372
										22.85	17.5663
										ErrBox	ErrBox
										23.85	17.6902
										24.15	17.6902
										24.15	18.295
										23.85	18.295
										23.85	17.6902
										ErrBox	ErrBox
										24.85	17.6377
										25.15	17.6377
										25.15	18.2129
										24.85	18.2129
										24.85	17.6377
										ErrBox	ErrBox
										25.85	17.4143
										26.15	17.4143
										26.15	18.1617
										25.85	18.1617
										25.85	17.4143
										ErrBox	ErrBox
										26.85	17.4316
										27.15	17.4316
										27.15	18.0958
										26.85	18.0958
										26.85	17.4316
										ErrBox	ErrBox
										27.85	17.4901
										28.15	17.4901
										28.15	18.0204
										27.85	18.0204
										27.85	17.4901
										ErrBox	ErrBox
										28.85	17.3837
										29.15	17.3837
										29.15	18.071
										28.85	18.071
										28.85	17.3837
										ErrBox	ErrBox
										29.85	17.3638
										30.15	17.3638
										30.15	18.0468
										29.85	18.0468
										29.85	17.3638
										ErrBox	ErrBox
										30.85	17.3765
										31.15	17.3765
										31.15	18.0146
										30.85	18.0146
										30.85	17.3765
										ErrBox	ErrBox
										31.85	17.3739
										32.15	17.3739
										32.15	17.9672
										31.85	17.9672
										31.85	17.3739
										ErrBox	ErrBox
										32.85	17.4015
										33.15	17.4015
										33.15	17.9143
										32.85	17.9143
										32.85	17.4015
										ErrBox	ErrBox
										33.85	17.3333
										34.15	17.3333
										34.15	17.9474
										33.85	17.9474
										33.85	17.3333
										ErrBox	ErrBox
										34.85	17.3221
										35.15	17.3221
										35.15	17.9312
										34.85	17.9312
										34.85	17.3221
										ErrBox	ErrBox
										35.85	17.0953
										36.15	17.0953
										36.15	18.0818
										35.85	18.0818
										35.85	17.0953
										ErrBox	ErrBox
										36.85	17.327
										37.15	17.327
										37.15	17.8139
										36.85	17.8139
										36.85	17.327
										ErrBox	ErrBox
										37.85	17.3041
										38.15	17.3041
										38.15	17.8017
										37.85	17.8017
										37.85	17.3041
										ErrBox	ErrBox
										38.85	17.1755
										39.15	17.1755
										39.15	17.8568
										38.85	17.8568
										38.85	17.1755
										ErrBox	ErrBox
										39.85	17.1442
										40.15	17.1442
										40.15	17.6726
										39.85	17.6726
										39.85	17.1442
										ErrBox	ErrBox
										40.85	17.0346
										41.15	17.0346
										41.15	17.7599
										40.85	17.7599
										40.85	17.0346
										ErrBox	ErrBox
										41.85	17.1307
										42.15	17.1307
										42.15	17.6144
										41.85	17.6144
										41.85	17.1307
										ErrBox	ErrBox
										42.85	16.878
										43.15	16.878
										43.15	17.8138
										42.85	17.8138
										42.85	16.878
										ErrBox	ErrBox
										43.85	16.9009
										44.15	16.9009
										44.15	17.546
										43.85	17.546
										43.85	16.9009
										ErrBox	ErrBox
										44.85	16.8839
										45.15	16.8839
										45.15	17.5504
										44.85	17.5504
										44.85	16.8839
										ErrBox	ErrBox
										45.85	16.9017
										46.15	16.9017
										46.15	17.3623
										45.85	17.3623
										45.85	16.9017
										ErrBox	ErrBox
										0.85	36.8913
										1.15	36.8913
										1.15	37.9585
										0.85	37.9585
										0.85	36.8913
										ErrBox	ErrBox
										46.85	16.3292
										47.15	16.3292
										47.15	16.7826
										46.85	16.7826
										46.85	16.3292
										ErrBox	ErrBox

## Sheet: PlotDat10
Source sheet	samples_sorted	0.2	17.9471	2	19.0253	0.390067	1	19.1175	0.336877	1.85	18.6353
Plot name	Average0	46.8	17.9471	3	18.8532	0.322455	46	16.5559	0.226677	2.15	18.6353
Plot Type	15			4	18.8038	0.268204	IsoLine	IsoLine	IsoLine	2.15	19.4154
1st free col	11			5	18.7817	0.201331				1.85	19.4154
Sigma Level	2			6	18.6131	0.466206				1.85	18.6353
Absolute Errs	TRUE			7	18.5099	0.318188				ErrBox	ErrBox
Symbol Type	1			8	18.442	0.294921				2.85	18.5307
Inverse Plot	FALSE			9	18.3783	0.340986				3.15	18.5307
Color Plot	TRUE			10	18.3386	0.289869				3.15	19.1756
3D plot	FALSE			11	18.3186	0.300887				2.85	19.1756
Linear	FALSE			12	18.2927	0.364408				2.85	18.5307
Data Range	AC112:AD157			13	18.2771	0.379235				ErrBox	ErrBox
Filled Symbols	TRUE			14	18.2647	0.412363				3.85	18.5356
ConcAge	FALSE			15	18.2288	0.353712				4.15	18.5356
ConcSwap	FALSE			16	18.2137	0.215765				4.15	19.072
1st Symbol-row	1			17	18.182	0.381217				3.85	19.072
				18	18.1765	0.404435				3.85	18.5356
				19	18.1218	0.386713				ErrBox	ErrBox
				20	18.0445	0.234796				4.85	18.5804
				21	18.0138	0.238005				5.15	18.5804
				22	18.0017	0.435451				5.15	18.983
				23	17.9926	0.302401				4.85	18.983
				24	17.9253	0.287591				4.85	18.5804
				25	17.788	0.373702				ErrBox	ErrBox
				26	17.7637	0.332101				5.85	18.1469
				27	17.7552	0.265141				6.15	18.1469
				28	17.7273	0.343666				6.15	19.0793
				29	17.7053	0.34148				5.85	19.0793
				30	17.6955	0.319065				5.85	18.1469
				31	17.6705	0.29664				ErrBox	ErrBox
				32	17.6579	0.256373				6.85	18.1918
				33	17.6403	0.307066				7.15	18.1918
				34	17.6267	0.30457				7.15	18.8281
				35	17.5885	0.493256				6.85	18.8281
				36	17.5704	0.24343				6.85	18.1918
				37	17.5529	0.248785				ErrBox	ErrBox
				38	17.5162	0.340649				7.85	18.1471
				39	17.4084	0.26421				8.15	18.1471
				40	17.3973	0.362692				8.15	18.7369
				41	17.3725	0.24187				7.85	18.7369
				42	17.3459	0.467902				7.85	18.1471
				43	17.2235	0.322565				ErrBox	ErrBox
				44	17.2171	0.333228				8.85	18.0373
				45	17.132	0.230309				9.15	18.0373
				IsoLine	IsoLine	IsoLine	IsoLine			9.15	18.7193
										8.85	18.7193
										8.85	18.0373
										ErrBox	ErrBox
										9.85	18.0487
										10.15	18.0487
										10.15	18.6285
										9.85	18.6285
										9.85	18.0487
										ErrBox	ErrBox
										10.85	18.0177
										11.15	18.0177
										11.15	18.6195
										10.85	18.6195
										10.85	18.0177
										ErrBox	ErrBox
										11.85	17.9282
										12.15	17.9282
										12.15	18.6571
										11.85	18.6571
										11.85	17.9282
										ErrBox	ErrBox
										12.85	17.8978
										13.15	17.8978
										13.15	18.6563
										12.85	18.6563
										12.85	17.8978
										ErrBox	ErrBox
										13.85	17.8523
										14.15	17.8523
										14.15	18.677
										13.85	18.677
										13.85	17.8523
										ErrBox	ErrBox
										14.85	17.8751
										15.15	17.8751
										15.15	18.5825
										14.85	18.5825
										14.85	17.8751
										ErrBox	ErrBox
										15.85	17.9979
										16.15	17.9979
										16.15	18.4294
										15.85	18.4294
										15.85	17.9979
										ErrBox	ErrBox
										16.85	17.8008
										17.15	17.8008
										17.15	18.5632
										16.85	18.5632
										16.85	17.8008
										ErrBox	ErrBox
										17.85	17.7721
										18.15	17.7721
										18.15	18.581
										17.85	18.581
										17.85	17.7721
										ErrBox	ErrBox
										18.85	17.7351
										19.15	17.7351
										19.15	18.5085
										18.85	18.5085
										18.85	17.7351
										ErrBox	ErrBox
										19.85	17.8097
										20.15	17.8097
										20.15	18.2793
										19.85	18.2793
										19.85	17.8097
										ErrBox	ErrBox
										20.85	17.7758
										21.15	17.7758
										21.15	18.2518
										20.85	18.2518
										20.85	17.7758
										ErrBox	ErrBox
										21.85	17.5663
										22.15	17.5663
										22.15	18.4372
										21.85	18.4372
										21.85	17.5663
										ErrBox	ErrBox
										22.85	17.6902
										23.15	17.6902
										23.15	18.295
										22.85	18.295
										22.85	17.6902
										ErrBox	ErrBox
										23.85	17.6377
										24.15	17.6377
										24.15	18.2129
										23.85	18.2129
										23.85	17.6377
										ErrBox	ErrBox
										24.85	17.4143
										25.15	17.4143
										25.15	18.1617
										24.85	18.1617
										24.85	17.4143
										ErrBox	ErrBox
										25.85	17.4316
										26.15	17.4316
										26.15	18.0958
										25.85	18.0958
										25.85	17.4316
										ErrBox	ErrBox
										26.85	17.4901
										27.15	17.4901
										27.15	18.0204
										26.85	18.0204
										26.85	17.4901
										ErrBox	ErrBox
										27.85	17.3837
										28.15	17.3837
										28.15	18.071
										27.85	18.071
										27.85	17.3837
										ErrBox	ErrBox
										28.85	17.3638
										29.15	17.3638
										29.15	18.0468
										28.85	18.0468
										28.85	17.3638
										ErrBox	ErrBox
										29.85	17.3765
										30.15	17.3765
										30.15	18.0146
										29.85	18.0146
										29.85	17.3765
										ErrBox	ErrBox
										30.85	17.3739
										31.15	17.3739
										31.15	17.9672
										30.85	17.9672
										30.85	17.3739
										ErrBox	ErrBox
										31.85	17.4015
										32.15	17.4015
										32.15	17.9143
										31.85	17.9143
										31.85	17.4015
										ErrBox	ErrBox
										32.85	17.3333
										33.15	17.3333
										33.15	17.9474
										32.85	17.9474
										32.85	17.3333
										ErrBox	ErrBox
										33.85	17.3221
										34.15	17.3221
										34.15	17.9312
										33.85	17.9312
										33.85	17.3221
										ErrBox	ErrBox
										34.85	17.0953
										35.15	17.0953
										35.15	18.0818
										34.85	18.0818
										34.85	17.0953
										ErrBox	ErrBox
										35.85	17.327
										36.15	17.327
										36.15	17.8139
										35.85	17.8139
										35.85	17.327
										ErrBox	ErrBox
										36.85	17.3041
										37.15	17.3041
										37.15	17.8017
										36.85	17.8017
										36.85	17.3041
										ErrBox	ErrBox
										37.85	17.1755
										38.15	17.1755
										38.15	17.8568
										37.85	17.8568
										37.85	17.1755
										ErrBox	ErrBox
										38.85	17.1442
										39.15	17.1442
										39.15	17.6726
										38.85	17.6726
										38.85	17.1442
										ErrBox	ErrBox
										39.85	17.0346
										40.15	17.0346
										40.15	17.7599
										39.85	17.7599
										39.85	17.0346
										ErrBox	ErrBox
										40.85	17.1307
										41.15	17.1307
										41.15	17.6144
										40.85	17.6144
										40.85	17.1307
										ErrBox	ErrBox
										41.85	16.878
										42.15	16.878
										42.15	17.8138
										41.85	17.8138
										41.85	16.878
										ErrBox	ErrBox
										42.85	16.9009
										43.15	16.9009
										43.15	17.546
										42.85	17.546
										42.85	16.9009
										ErrBox	ErrBox
										43.85	16.8839
										44.15	16.8839
										44.15	17.5504
										43.85	17.5504
										43.85	16.8839
										ErrBox	ErrBox
										44.85	16.9017
										45.15	16.9017
										45.15	17.3623
										44.85	17.3623
										44.85	16.9017
										ErrBox	ErrBox
										0.85	18.7806
										1.15	18.7806
										1.15	19.4544
										0.85	19.4544
										0.85	18.7806
										ErrBox	ErrBox
										45.85	16.3292
										46.15	16.3292
										46.15	16.7826
										45.85	16.7826
										45.85	16.3292
										ErrBox	ErrBox

[truncated: 17 more sheets: PlotDat12, PlotDat14, PlotDat15, PlotDat16, PlotDat17, PlotDat18, PlotDat19, PlotDat21, PlotDat23, PlotDat24, PlotDat25, PlotDat26, PlotDat27, PlotDat28, PlotDat29, samples_sorted, Table2]
